# Supplementary material for: Food hazards on the European Union market: The data analysis of the Rapid Alert System for Food and Feed
Source: PubMed Central journal article supplement (PMC7063371; doi:10.1002/fsn3.1448), 2020-02-11
Supplement: FSN3-8-1603-s001.pdf [file FSN3-8-1603-s001.pdf]

## Supplementary Information

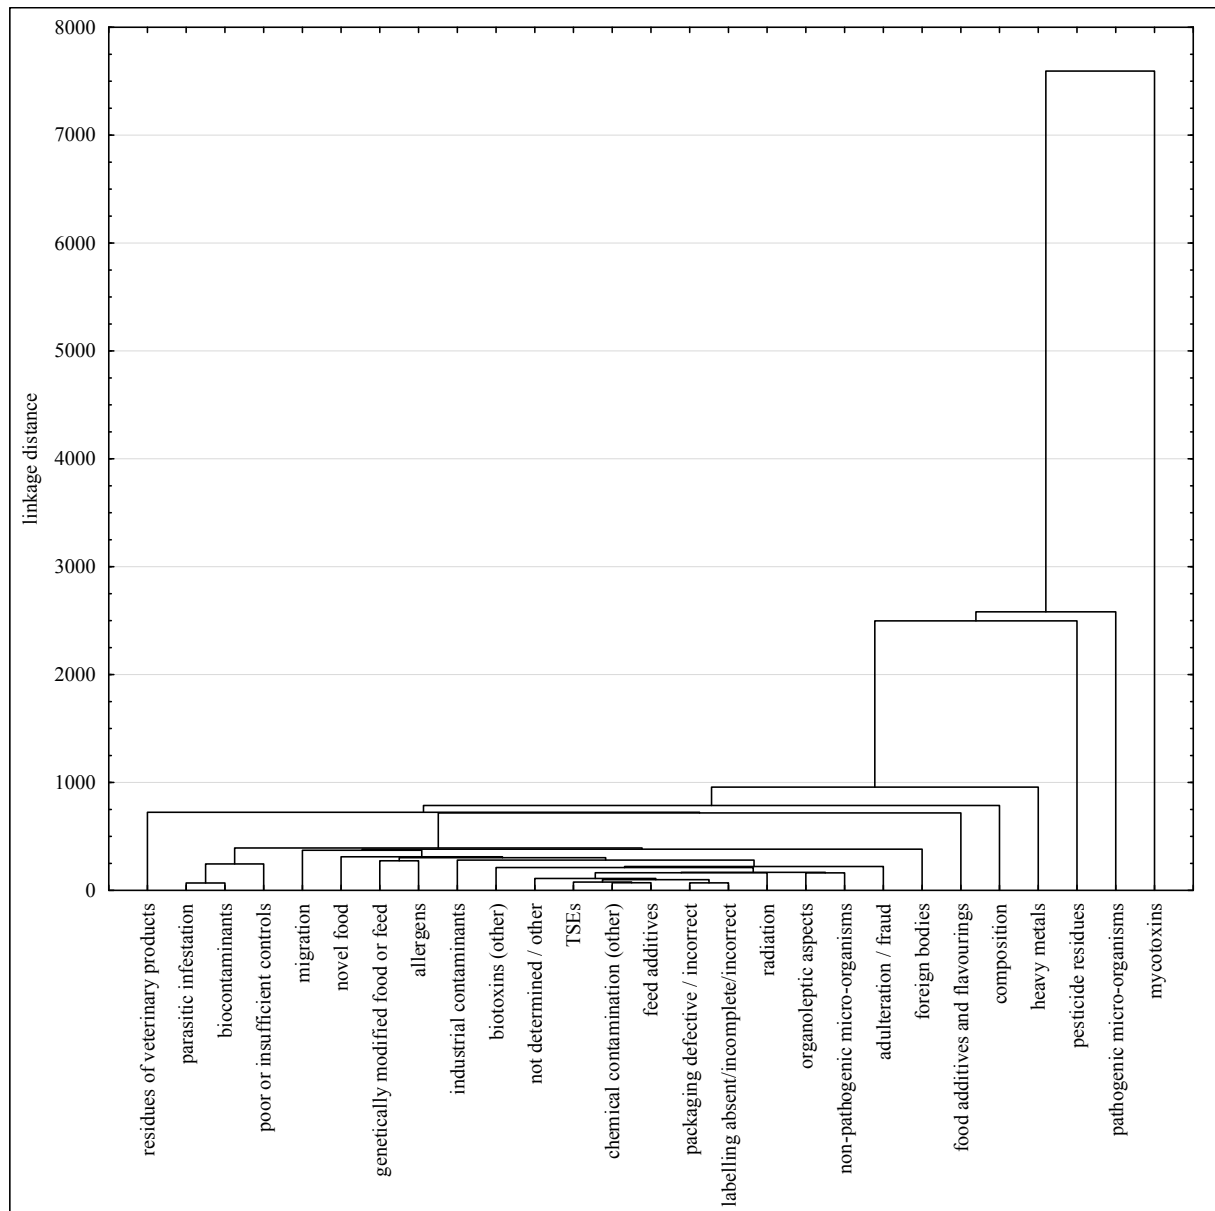

**FIGURE S1** Similarities between notifications within product categories and hazard categories.

residues of veterinary products – residues of veterinary medicinal products

TSEs – transmissible spongiform encephalopathies



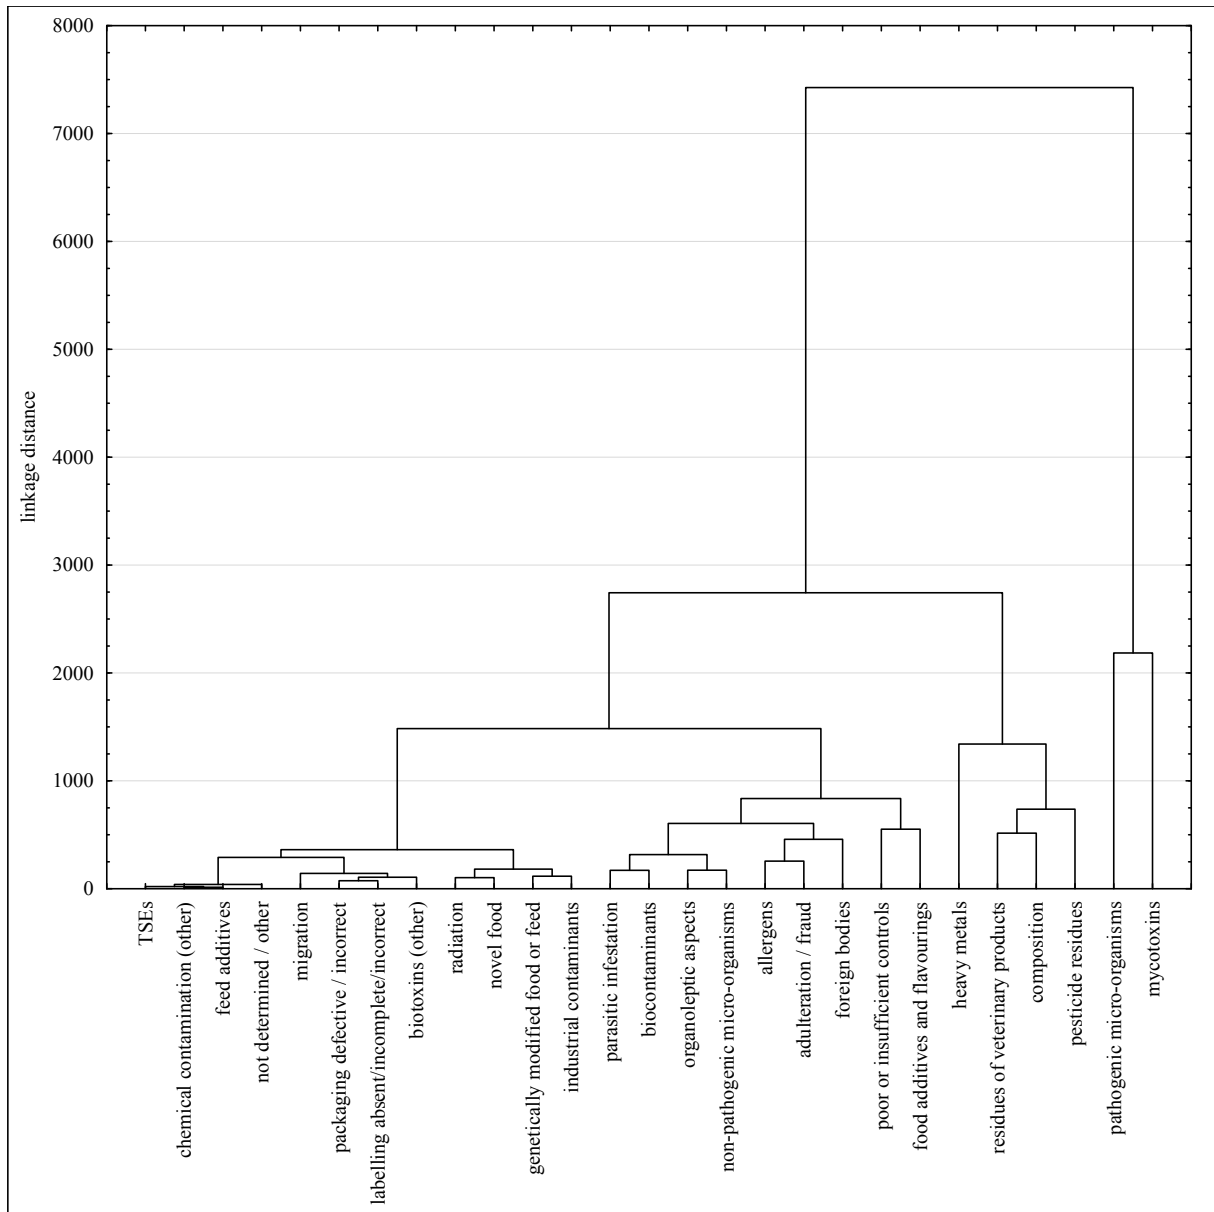

**FIGURE S3** Similarities between notifications within notifying countries and hazard categories.

residues of veterinary products – residues of veterinary medicinal products

TSEs – transmissible spongiform encephalopathies

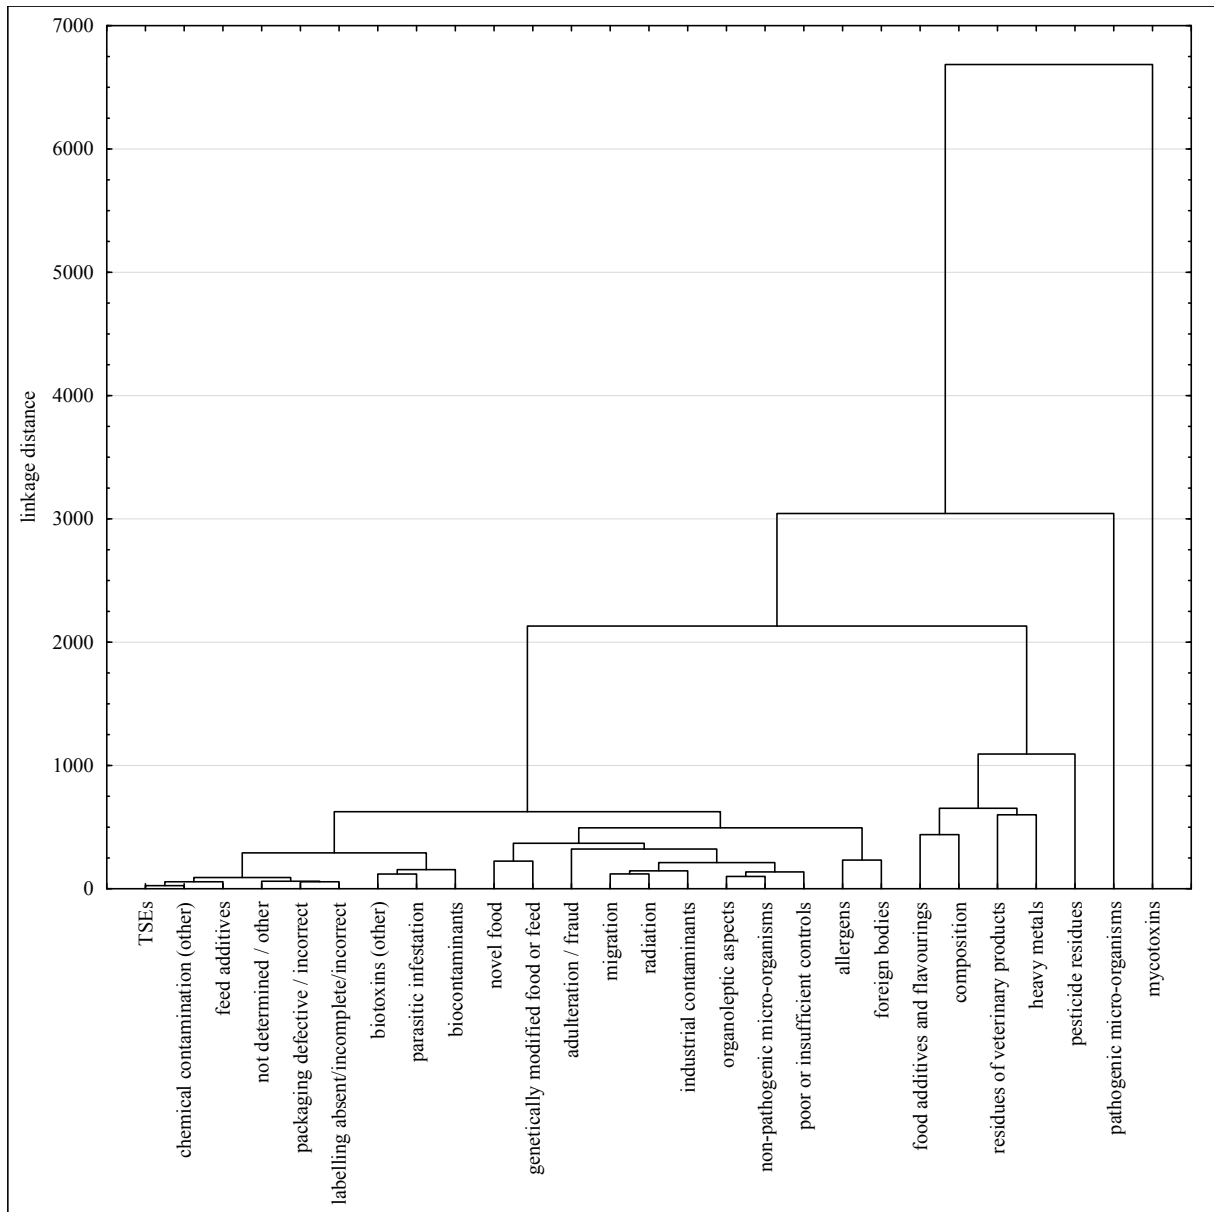

**FIGURE S4** Similarities between notifications within origin countries and hazard categories.

residues of veterinary products – residues of veterinary medicinal products

TSEs – transmissible spongiform encephalopathies

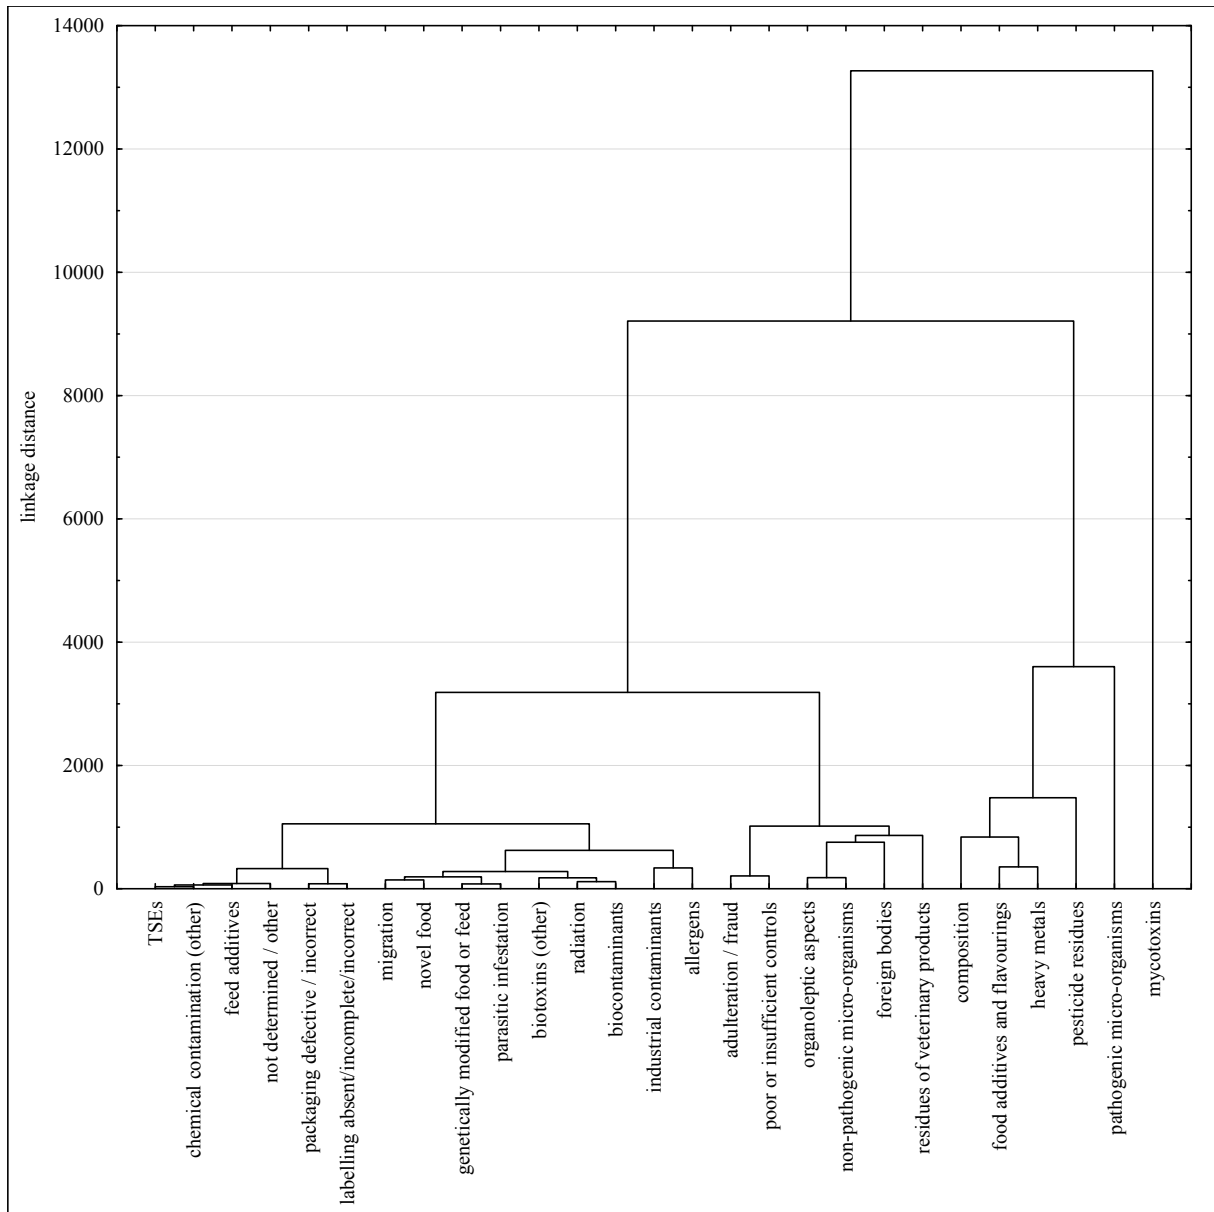

**FIGURE S5** Similarities between notifications within notification basis and hazard categories.

residues of veterinary products – residues of veterinary medicinal products

TSEs – transmissible spongiform encephalopathies

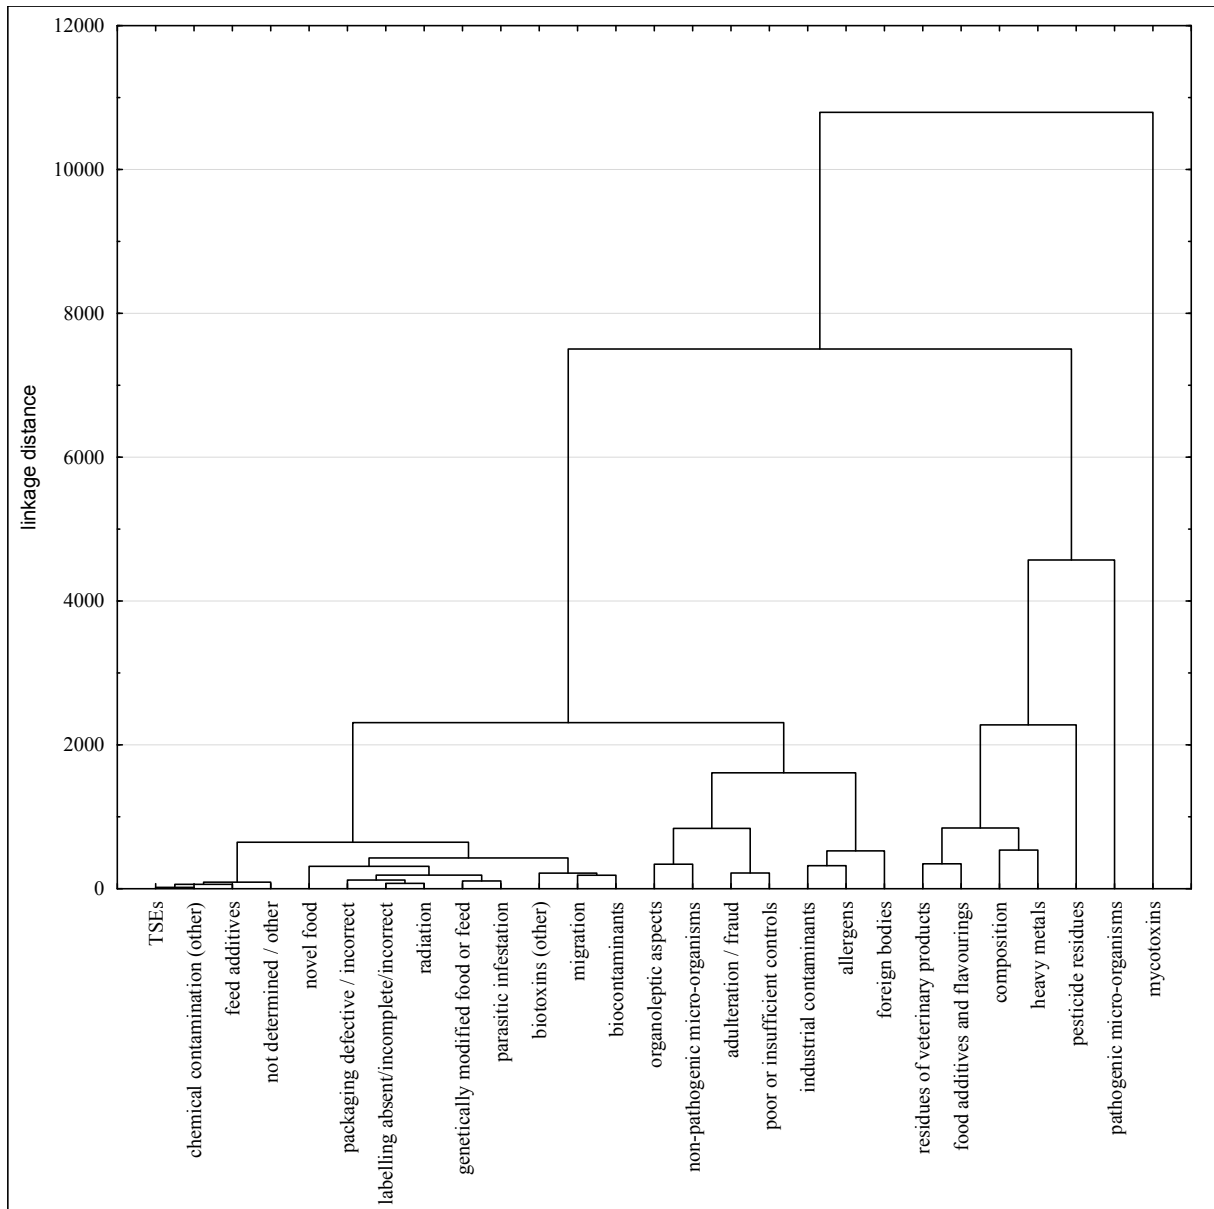

**FIGURE S6** Similarities between notifications within notification type and hazard categories.

residues of veterinary products – residues of veterinary medicinal products  
 TSEs – transmissible spongiform encephalopathies

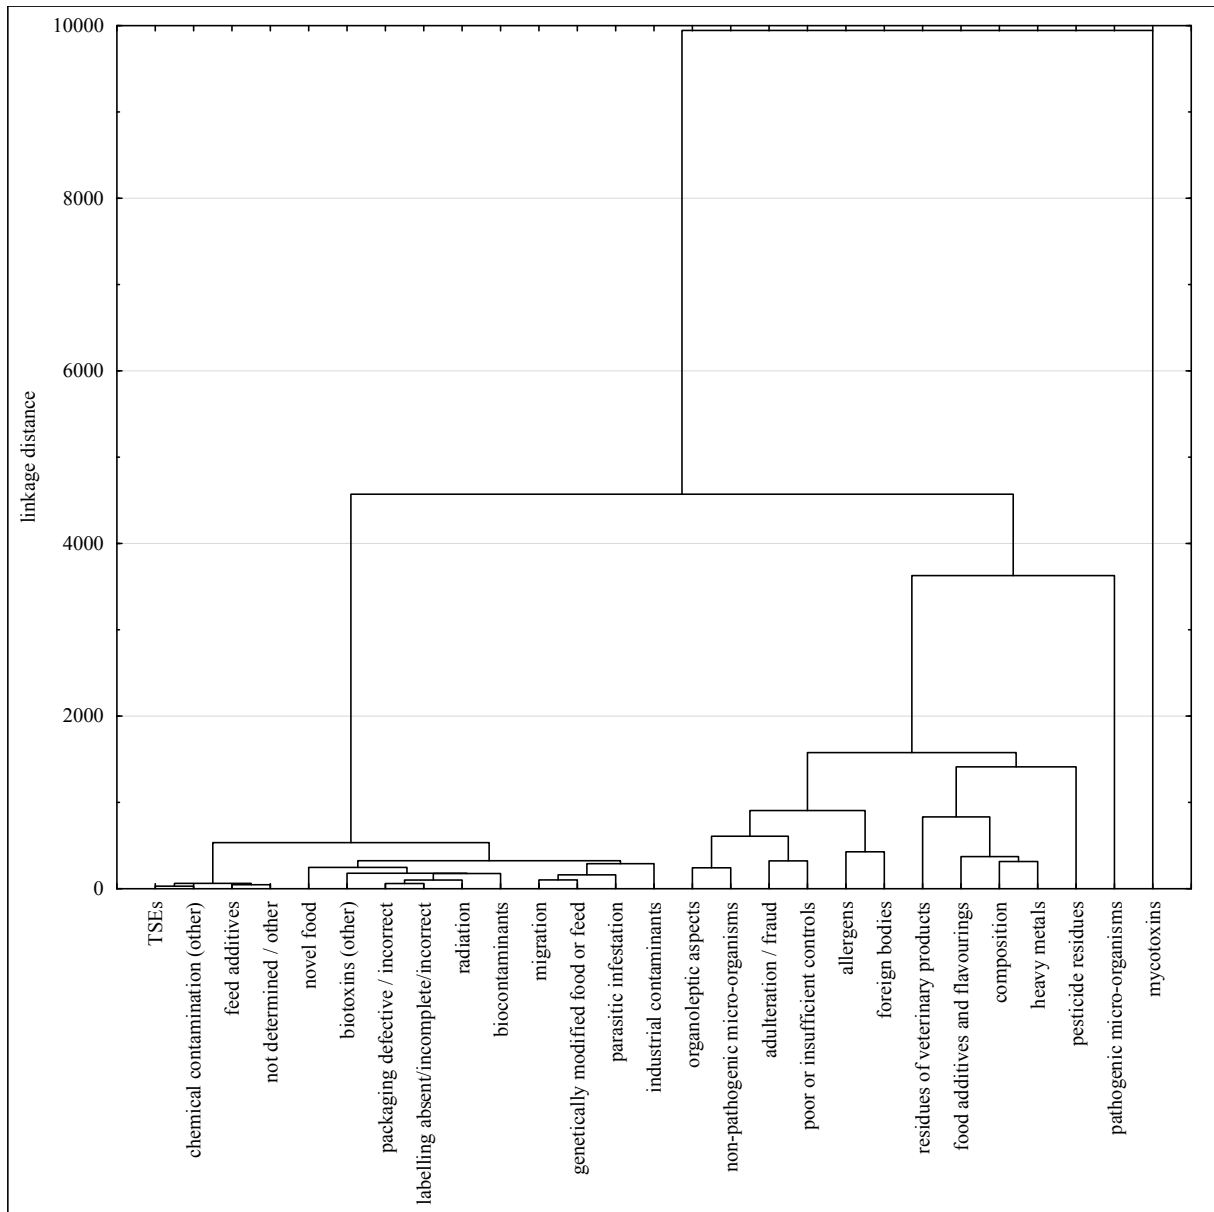

FIGURE S7 Similarities between notifications within distribution status and hazard categories.

residues of veterinary products – residues of veterinary medicinal products

TSEs – transmissible spongiform encephalopathies

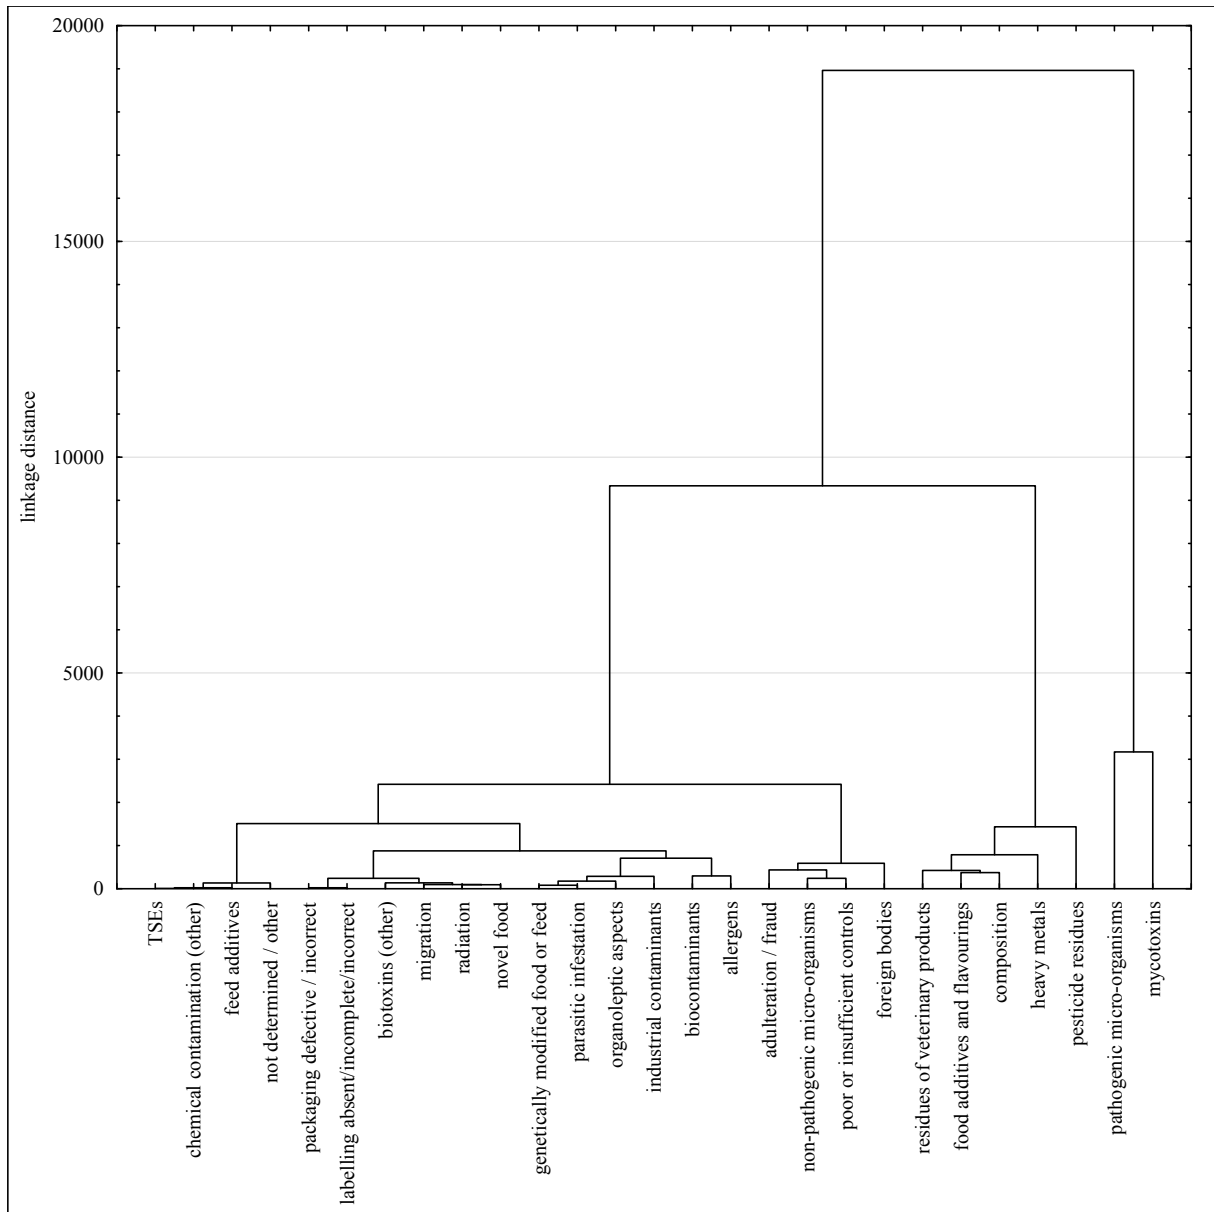

**FIGURE S8** Similarities between notifications within risk decision and hazard categories.

residues of veterinary products – residues of veterinary medicinal products

TSEs – transmissible spongiform encephalopathies



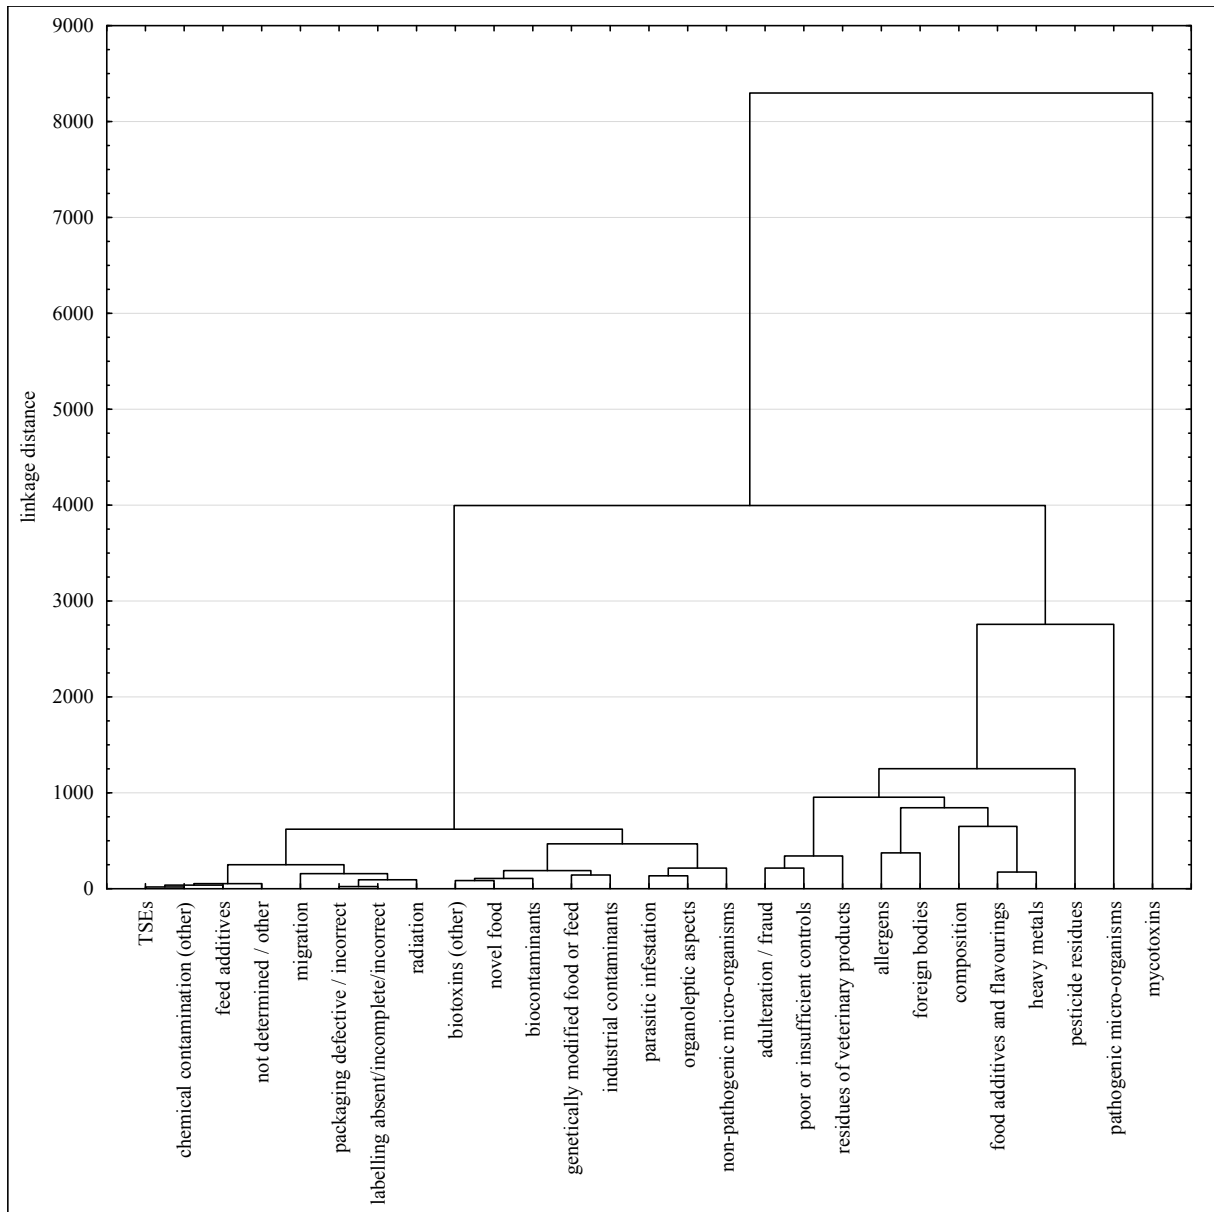

**FIGURE S9** Similarities between notifications within action taken and hazard categories.

residues of veterinary products – residues of veterinary medicinal products  
 TSEs – transmissible spongiform encephalopathies

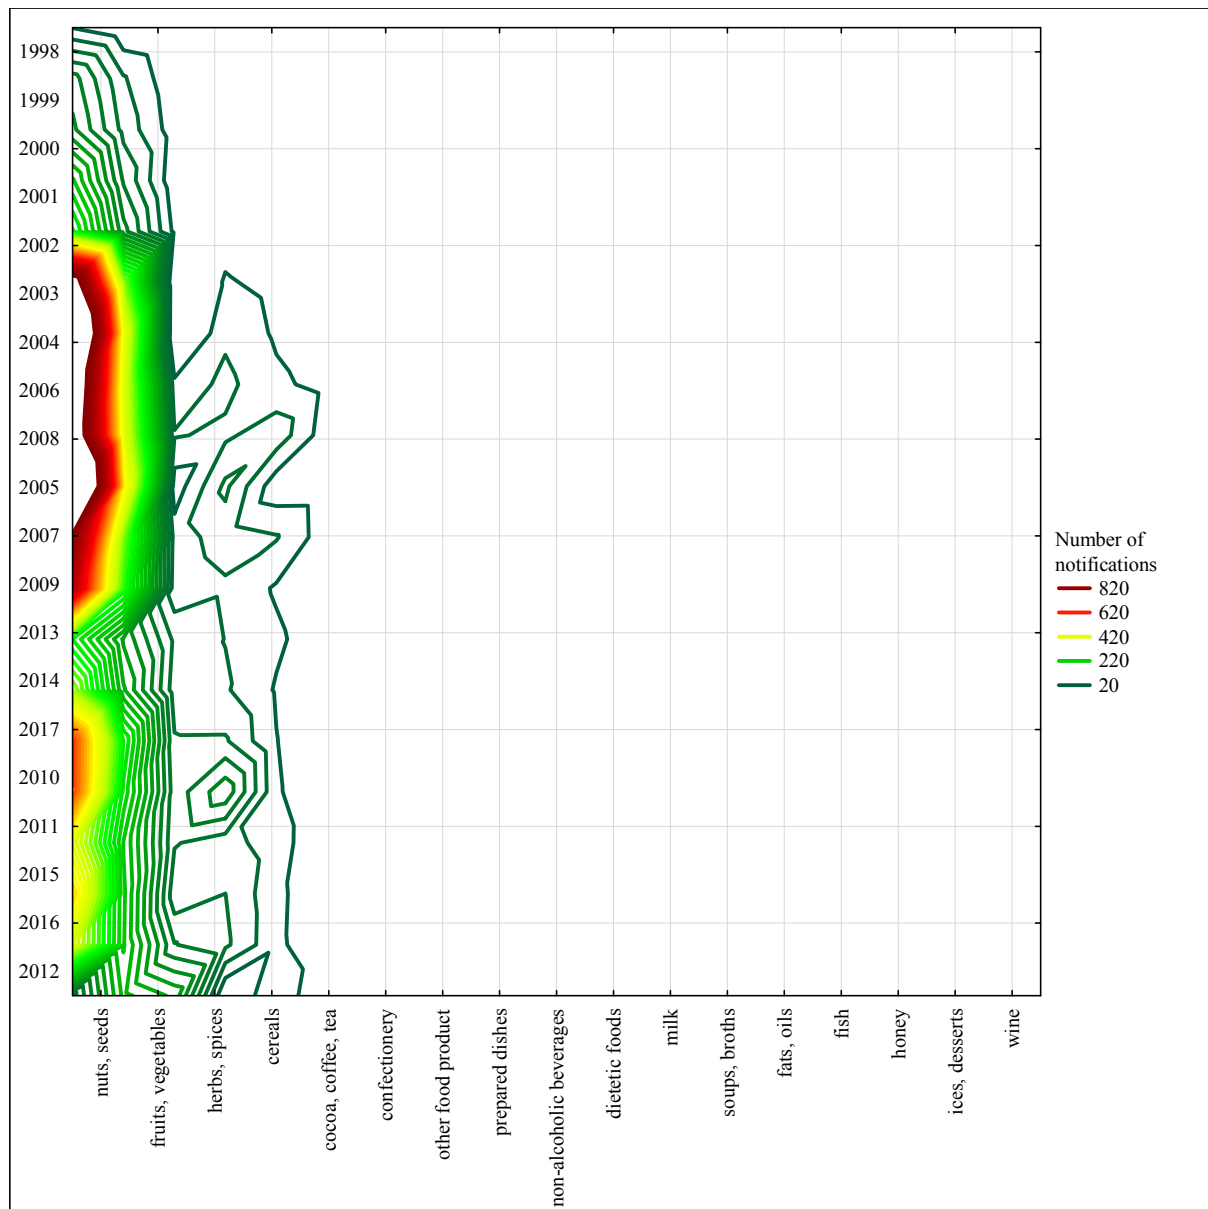

cereals – cereals and bakery products  
 cocoa, coffee, tea – cocoa and cocoa preparations, coffee and tea  
 dietetic foods – dietetic foods, food supplements, fortified foods  
 fats, oils – fats and oils  
 fish – fish and fish products  
 fruits, vegetables – fruits and vegetables  
 herbs, spices – herbs and spices  
 honey – honey and royal jelly  
 ices, desserts – ices and desserts  
 milk – milk and milk products  
 nuts, seeds – nuts, nut products and seeds  
 other food product – other food product / mixed  
 prepared dishes – prepared dishes and snacks  
 soups, broths – soups, broths, sauces and condiments

**FIGURE S10** Similarities between product category and year within notifications on mycotoxins.

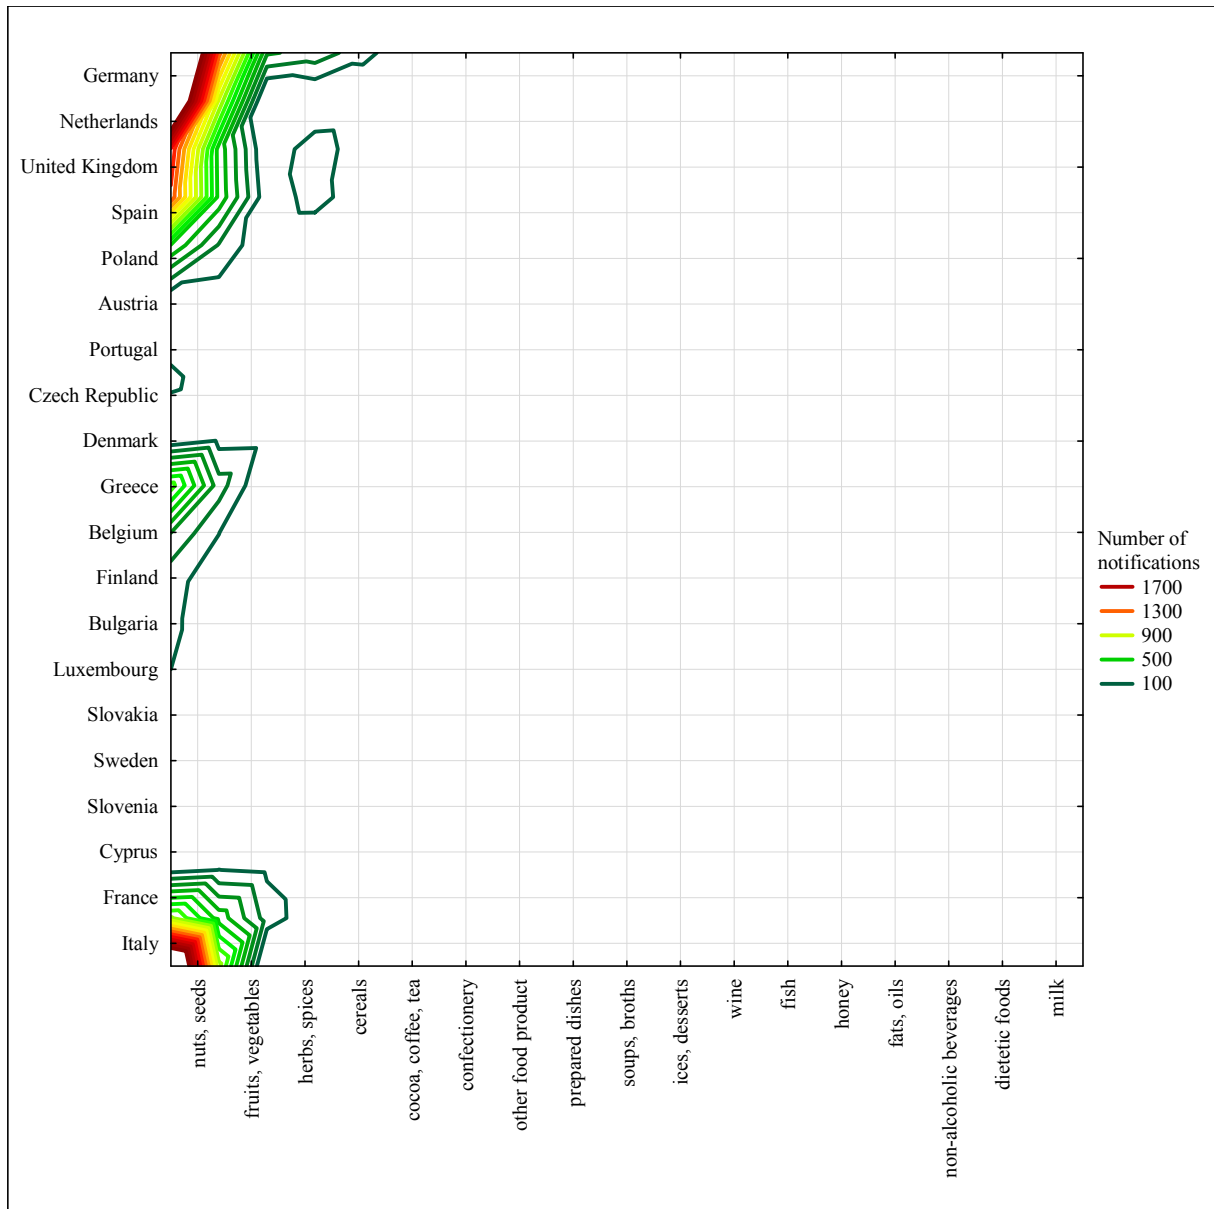

cereals – cereals and bakery products  
 cocoa, coffee, tea – cocoa and cocoa preparations, coffee and tea  
 dietetic foods – dietetic foods, food supplements, fortified foods  
 fats, oils – fats and oils  
 fish – fish and fish products  
 fruits, vegetables – fruits and vegetables  
 herbs, spices – herbs and spices  
 honey – honey and royal jelly  
 ices, desserts – ices and desserts  
 milk – milk and milk products  
 nuts, seeds – nuts, nut products and seeds  
 other food product – other food product / mixed  
 prepared dishes – prepared dishes and snacks  
 soups, broths – soups, broths, sauces and condiments

**FIGURE S11** Similarities between product category and notifying country within notifications on mycotoxins.

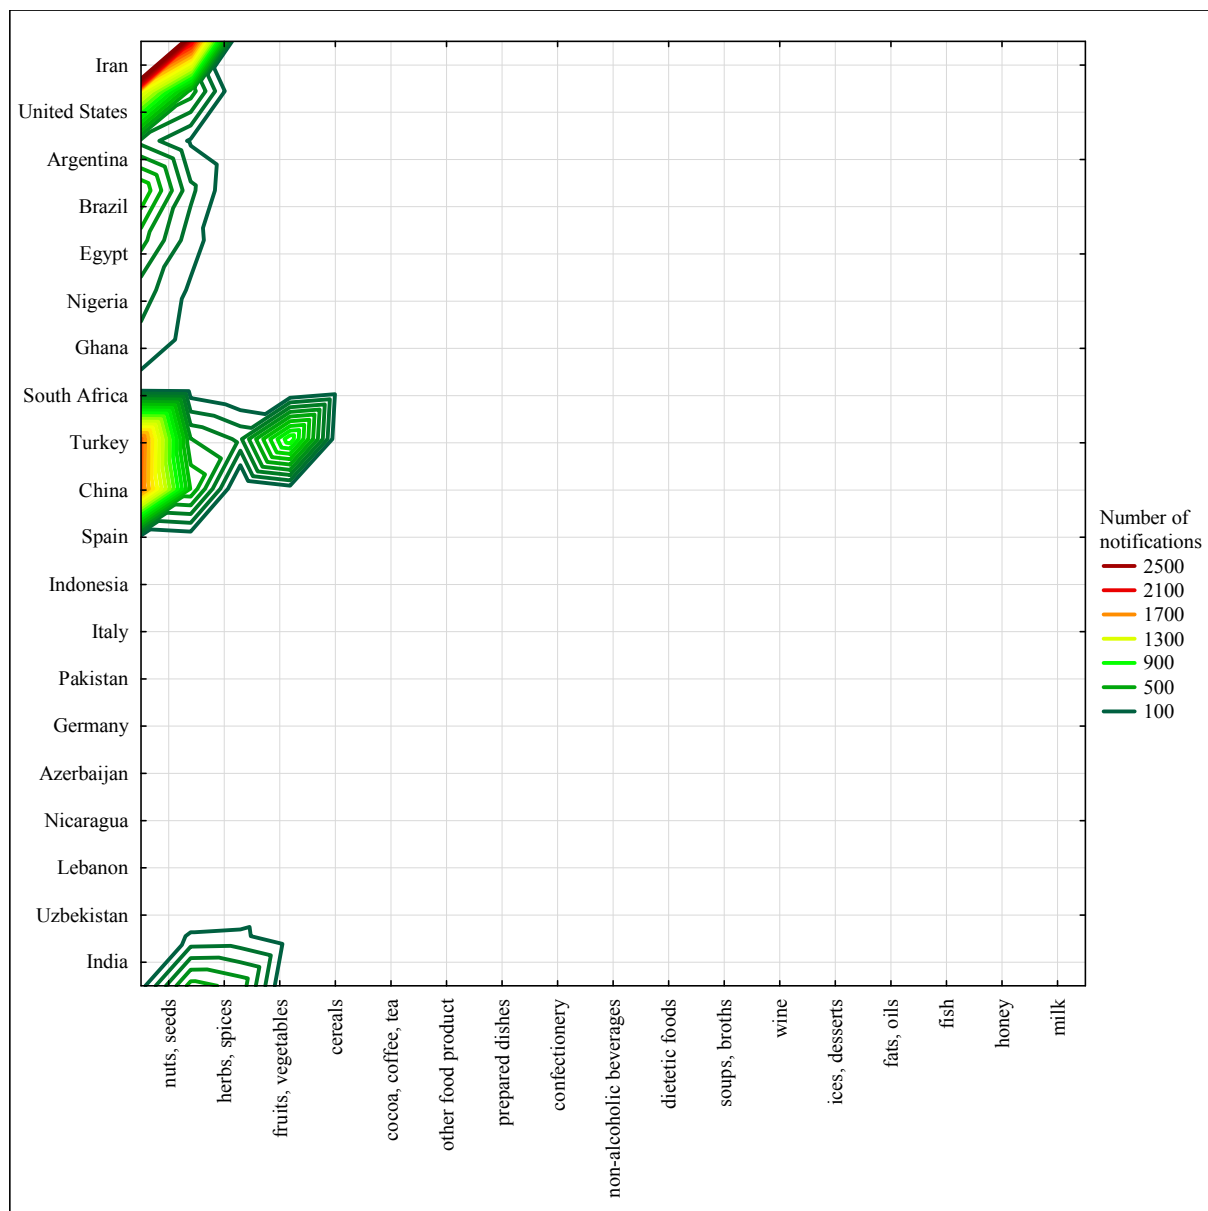

cereals – cereals and bakery products  
 cocoa, coffee, tea – cocoa and cocoa preparations, coffee and tea  
 dietetic foods – dietetic foods, food supplements, fortified foods  
 fats, oils – fats and oils  
 fish – fish and fish products  
 fruits, vegetables – fruits and vegetables  
 herbs, spices – herbs and spices  
 honey – honey and royal jelly  
 ices, desserts – ices and desserts  
 milk – milk and milk products  
 nuts, seeds – nuts, nut products and seeds  
 other food product – other food product / mixed  
 prepared dishes – prepared dishes and snacks  
 soups, broths – soups, broths, sauces and condiments

**FIGURE S12** Similarities between product category and origin country within notifications on mycotoxins.

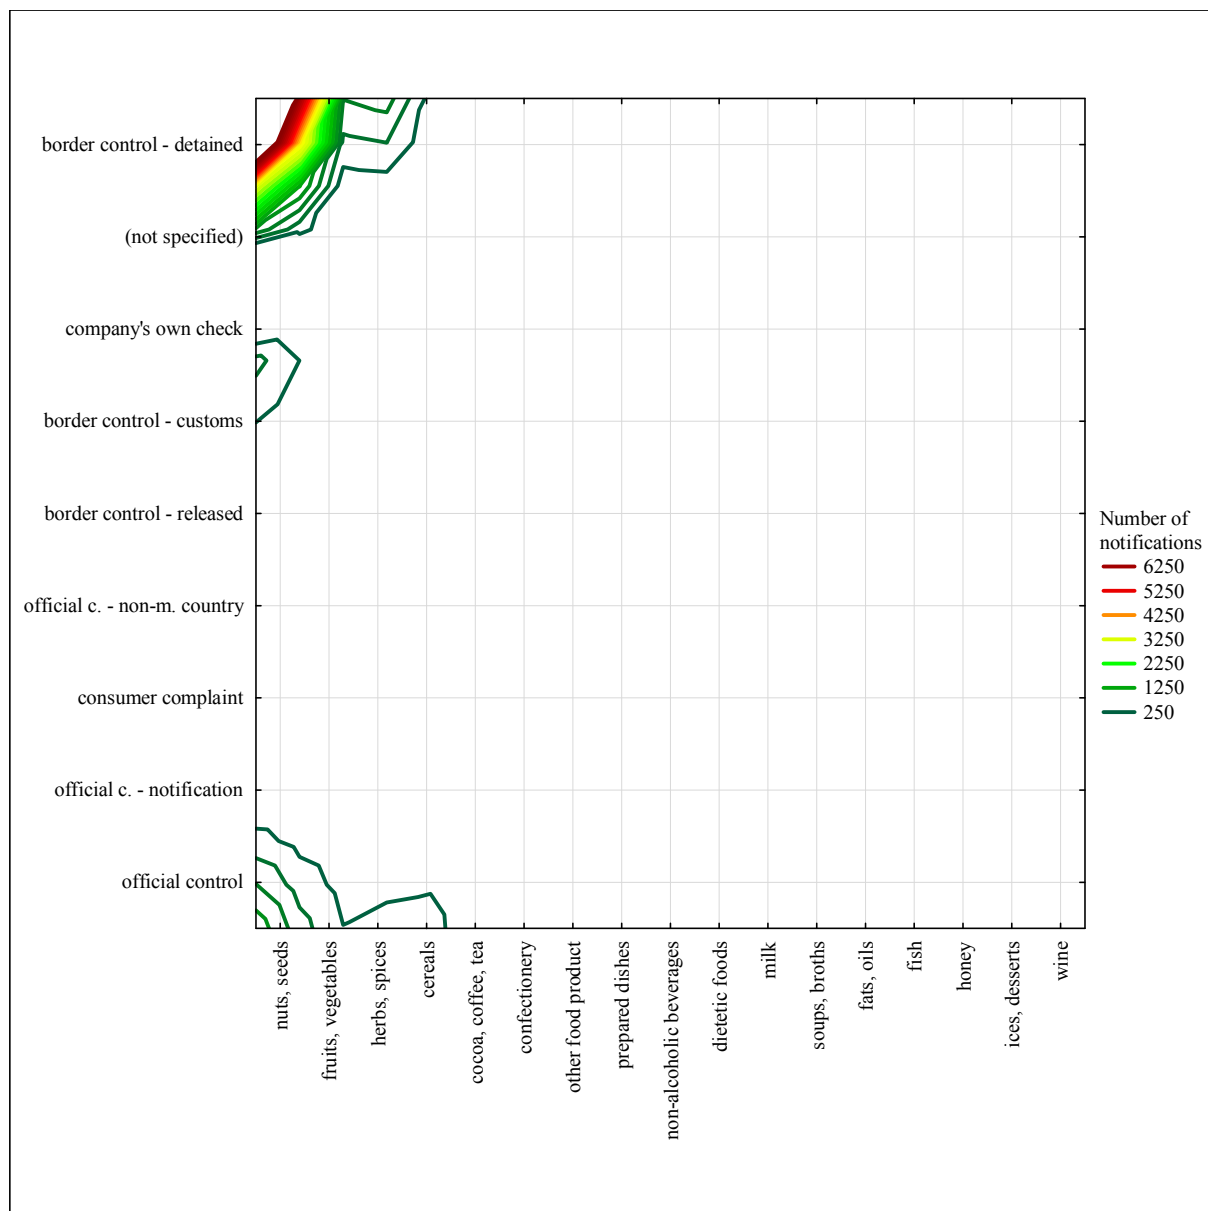

cereals – cereals and bakery products  
 cocoa, coffee, tea – cocoa and cocoa preparations, coffee and tea  
 dietetic foods – dietetic foods, food supplements, fortified foods  
 fats, oils – fats and oils  
 fish – fish and fish products  
 fruits, vegetables – fruits and vegetables  
 herbs, spices – herbs and spices  
 honey – honey and royal jelly  
 ices, desserts – ices and desserts  
 milk – milk and milk products  
 nuts, seeds – nuts, nut products and seeds  
 other food product – other food product / mixed  
 prepared dishes – prepared dishes and snacks  
 soups, broths – soups, broths, sauces and condiments

border control - customs – border control - consignment under customs  
 border control - detained – border control - consignment detained  
 border control - released – border control - consignment released  
 official c. - non-m. country – official control in non-member country  
 official c. - notification – official control following RASFF notification  
 official control – official control on the market

**FIGURE S13** Similarities between product category and notification basis within notifications on mycotoxins.

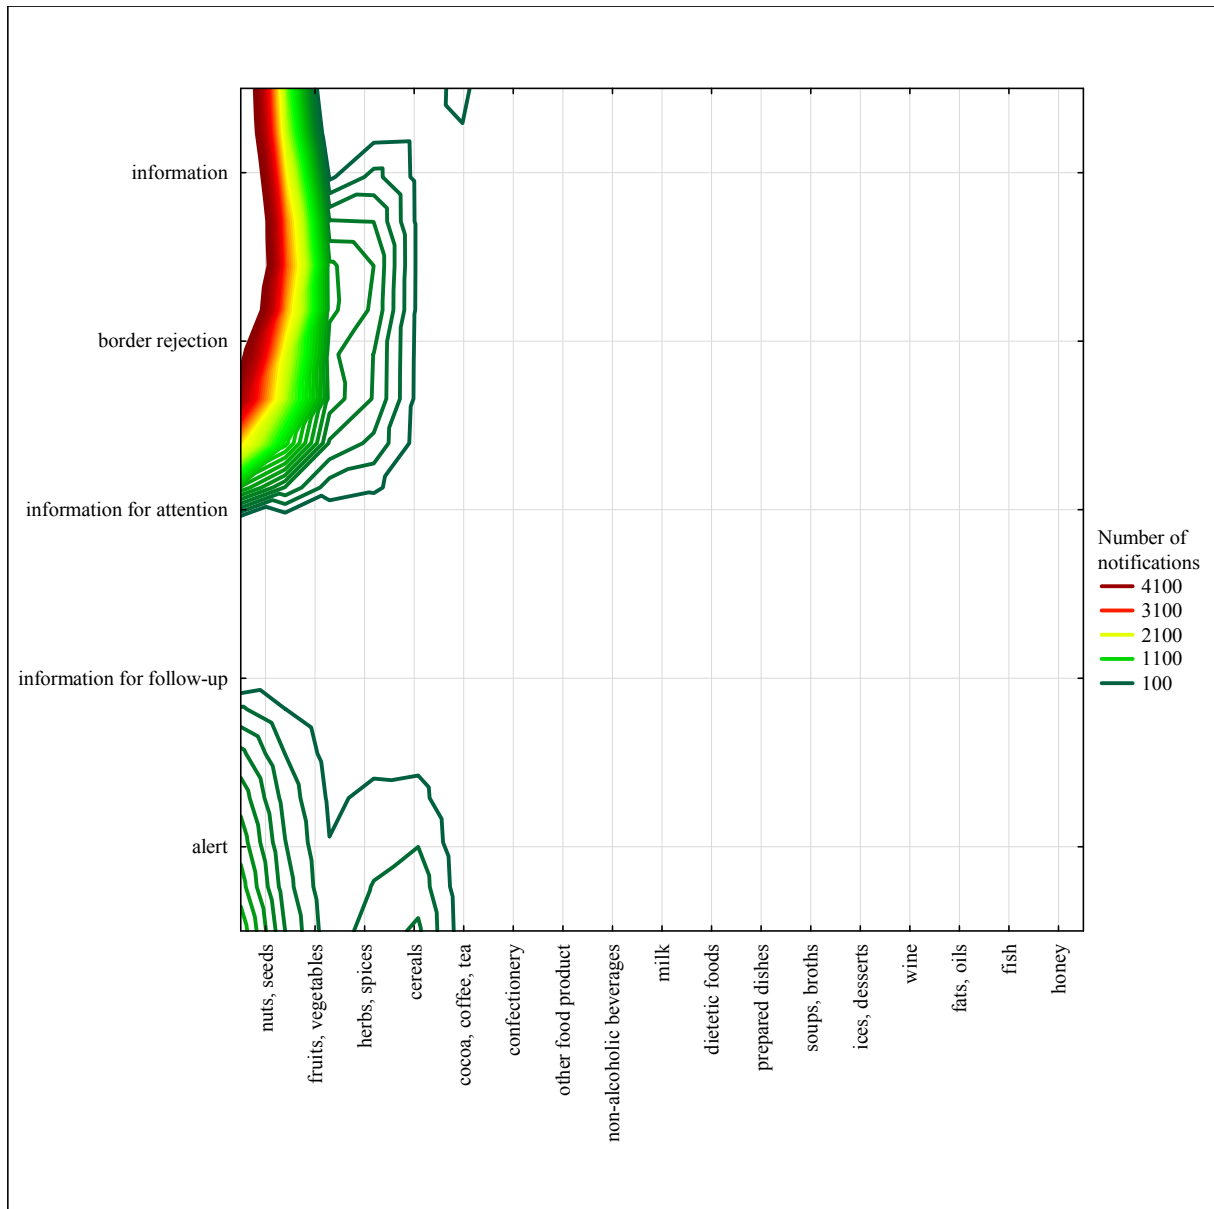

cereals – cereals and bakery products  
 cocoa, coffee, tea – cocoa and cocoa preparations, coffee and tea  
 dietetic foods – dietetic foods, food supplements, fortified foods  
 fats, oils – fats and oils  
 fish – fish and fish products  
 fruits, vegetables – fruits and vegetables  
 herbs, spices – herbs and spices  
 honey – honey and royal jelly  
 ices, desserts – ices and desserts  
 milk – milk and milk products  
 nuts, seeds – nuts, nut products and seeds  
 other food product – other food product / mixed  
 prepared dishes – prepared dishes and snacks  
 soups, broths – soups, broths, sauces and condiments

**FIGURE S14** Similarities between product category and notification type within notifications on mycotoxins.

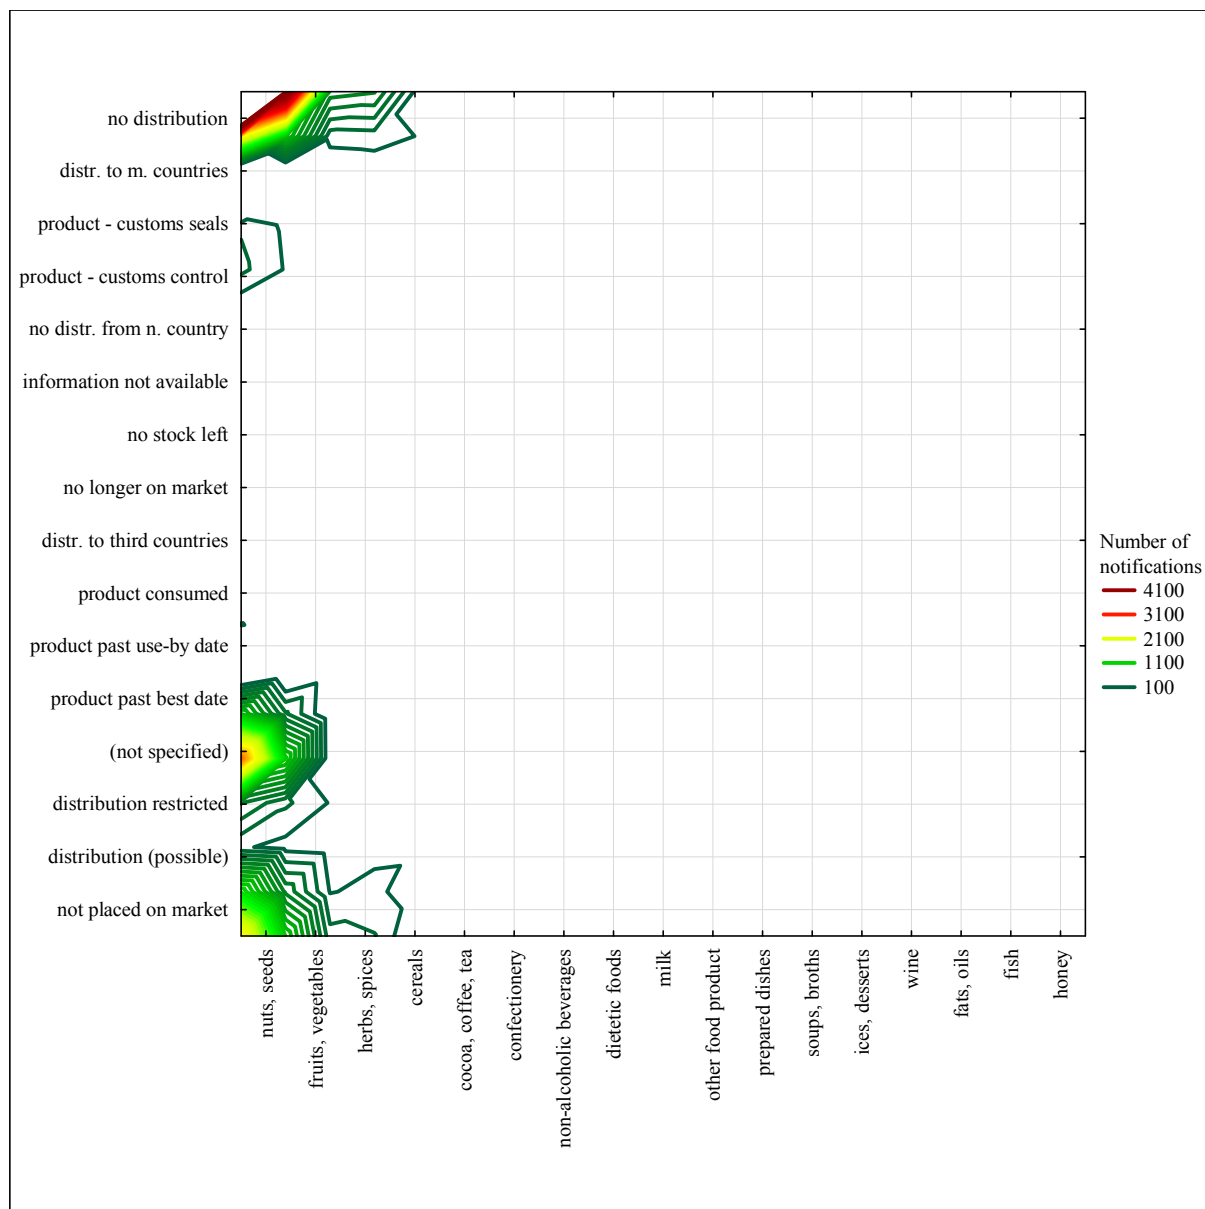

cereals – cereals and bakery products  
 cocoa, coffee, tea – cocoa and cocoa preparations, coffee and tea  
 dietetic foods – dietetic foods, food supplements, fortified foods  
 fats, oils – fats and oils  
 fish – fish and fish products  
 fruits, vegetables – fruits and vegetables  
 herbs, spices – herbs and spices  
 honey – honey and royal jelly  
 ices, desserts – ices and desserts  
 milk – milk and milk products  
 nuts, seeds – nuts, nut products and seeds  
 other food product – other food product / mixed  
 prepared dishes – prepared dishes and snacks  
 soups, broths – soups, broths, sauces and condiments

distr. to m. countries – distribution to other member countries  
 distr. to third countries – distribution to third countries  
 distribution (possible) – distribution on the market (possible)  
 distribution restricted – distribution restricted to notifying country  
 information not available – information on distribution not (yet) available  
 no distr. from n. country – no distribution from notifying country  
 no longer on market – product (presumably) no longer on the market  
 not placed on market – product not (yet) placed on the market  
 product - customs control – product under customs control  
 product - customs seals – product allowed to travel to destination under customs seals  
 product consumed – product already consumed  
 product past best date – product past best before date

**FIGURE S15** Similarities between product category and distribution status within notifications on mycotoxins.

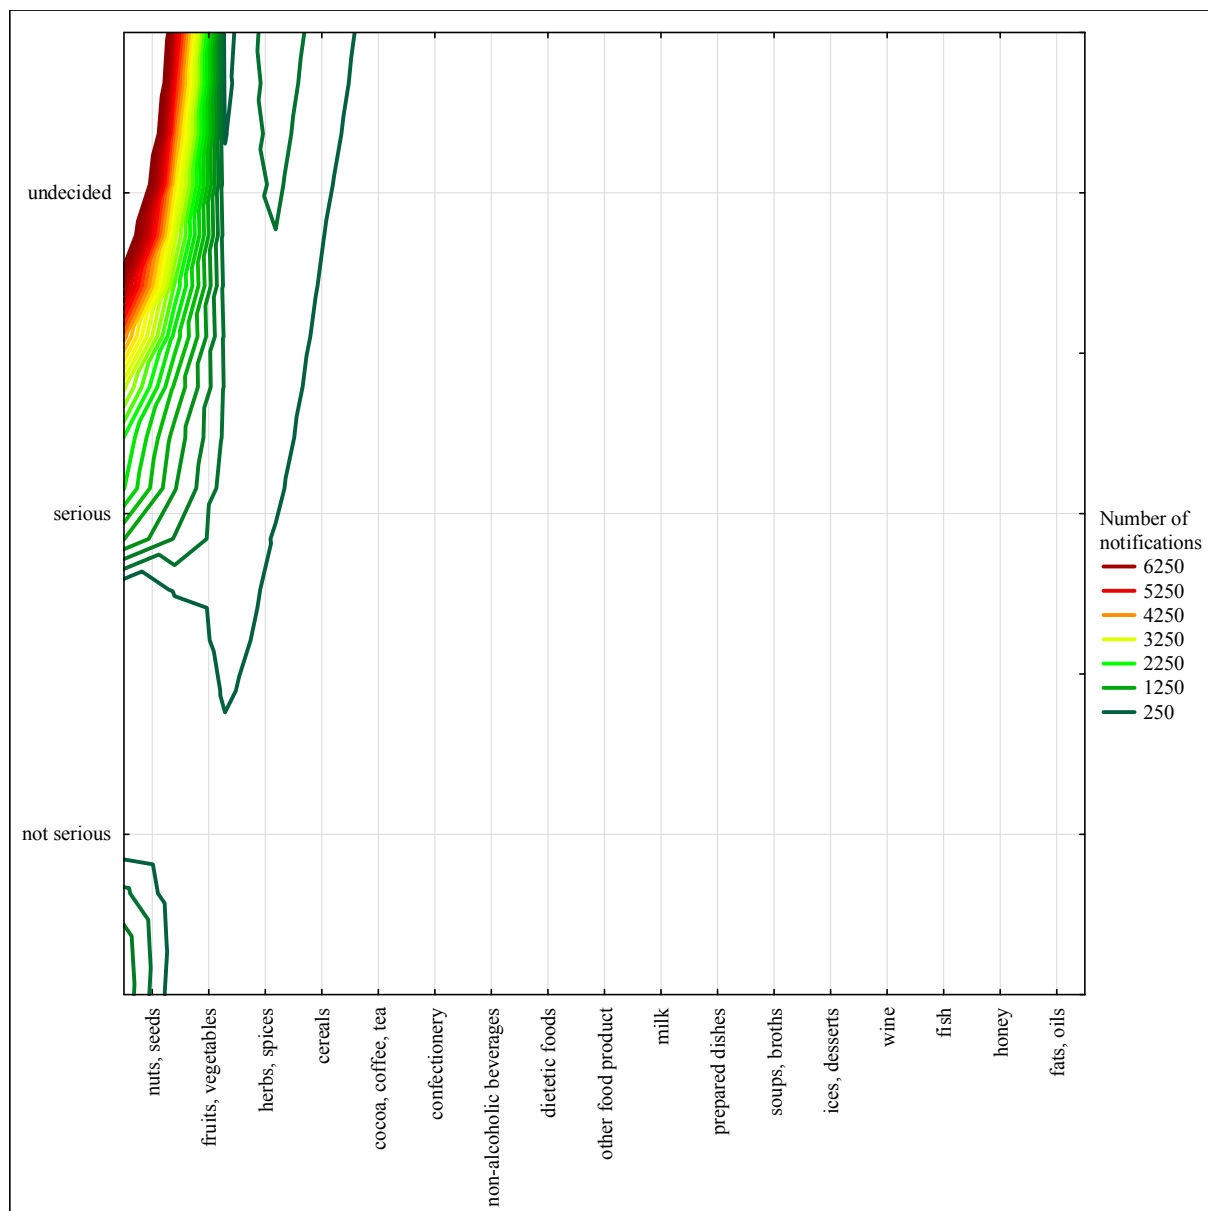

cereals – cereals and bakery products  
 cocoa, coffee, tea – cocoa and cocoa preparations, coffee and tea  
 dietetic foods – dietetic foods, food supplements, fortified foods  
 fats, oils – fats and oils  
 fish – fish and fish products  
 fruits, vegetables – fruits and vegetables  
 herbs, spices – herbs and spices  
 honey – honey and royal jelly  
 ices, desserts – ices and desserts  
 milk – milk and milk products  
 nuts, seeds – nuts, nut products and seeds  
 other food product – other food product / mixed  
 prepared dishes – prepared dishes and snacks  
 soups, broths – soups, broths, sauces and condiments

**FIGURE S16** Similarities between product category and risk decision within notifications on mycotoxins.



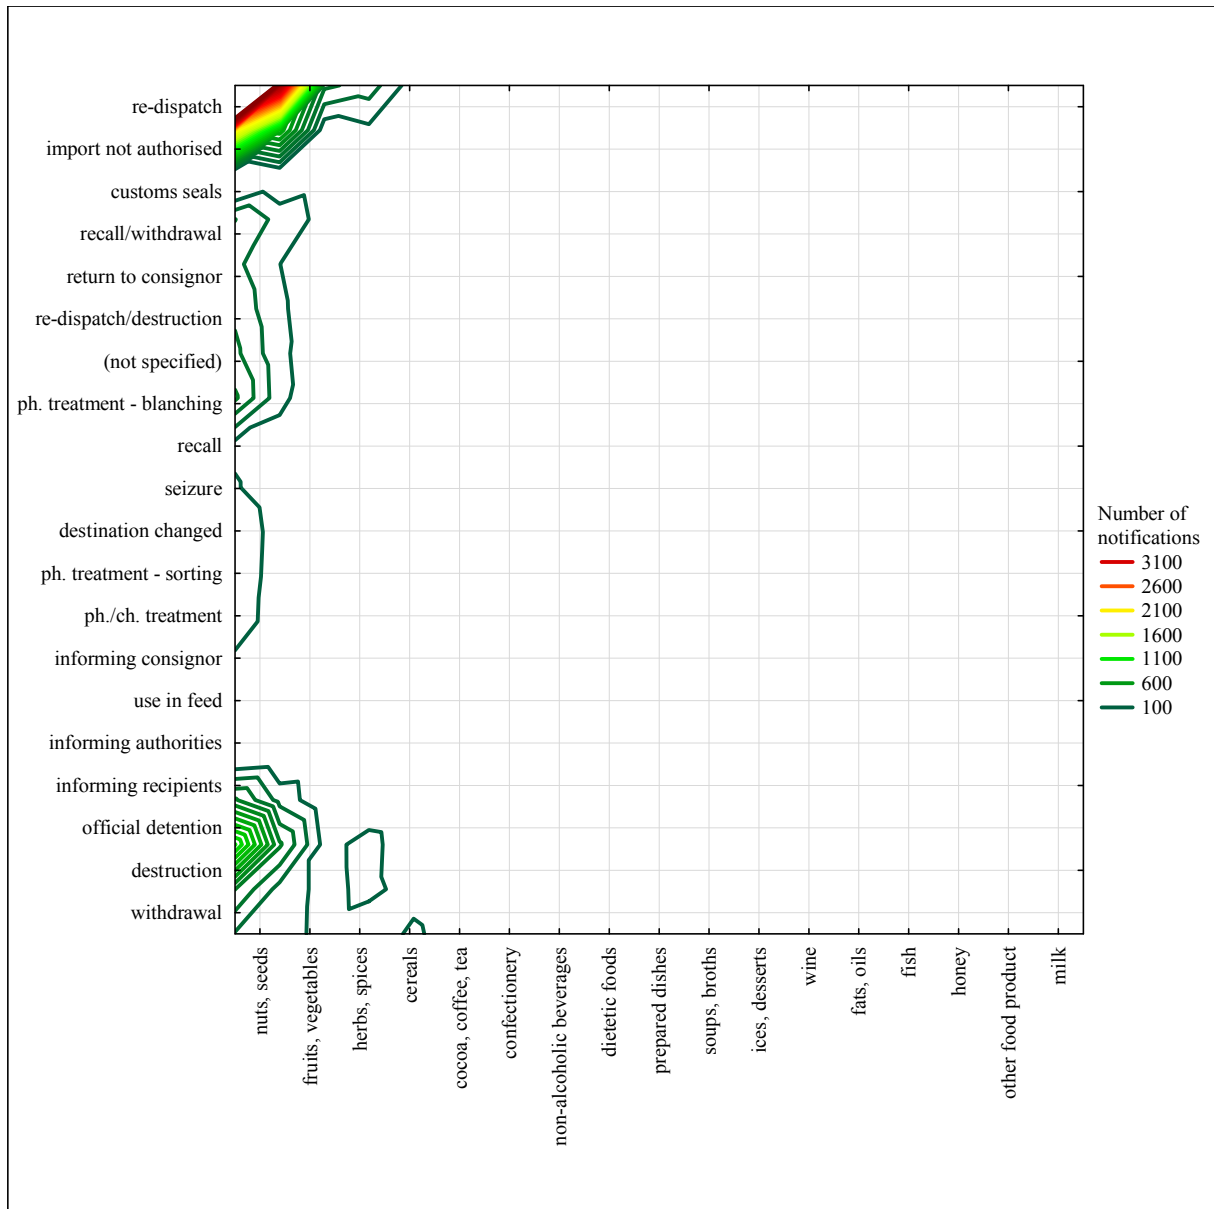

cereals – cereals and bakery products  
 cocoa, coffee, tea – cocoa and cocoa preparations, coffee and tea  
 dietetic foods – dietetic foods, food supplements, fortified foods  
 fats, oils – fats and oils  
 fish – fish and fish products  
 fruits, vegetables – fruits and vegetables  
 herbs, spices – herbs and spices  
 honey – honey and royal jelly  
 ices, desserts – ices and desserts  
 milk – milk and milk products  
 nuts, seeds – nuts, nut products and seeds  
 other food product – other food product / mixed  
 prepared dishes – prepared dishes and snacks  
 soups, broths – soups, broths, sauces and condiments

customs seals – placed under customs seals  
 destination changed – destination of the product changed  
 ph. treatment - blanching – physical treatment - blanching  
 ph. treatment - sorting – physical treatment - sorting  
 ph./ch. treatment – physical/chemical treatment  
 recall – recall from consumers  
 recall/withdrawal – product recall or withdrawal  
 re-dispatch/destruction – re-dispatch or destruction  
 withdrawal – withdrawal from the market

**FIGURE S17** Similarities between product category and action taken within notifications on mycotoxins.

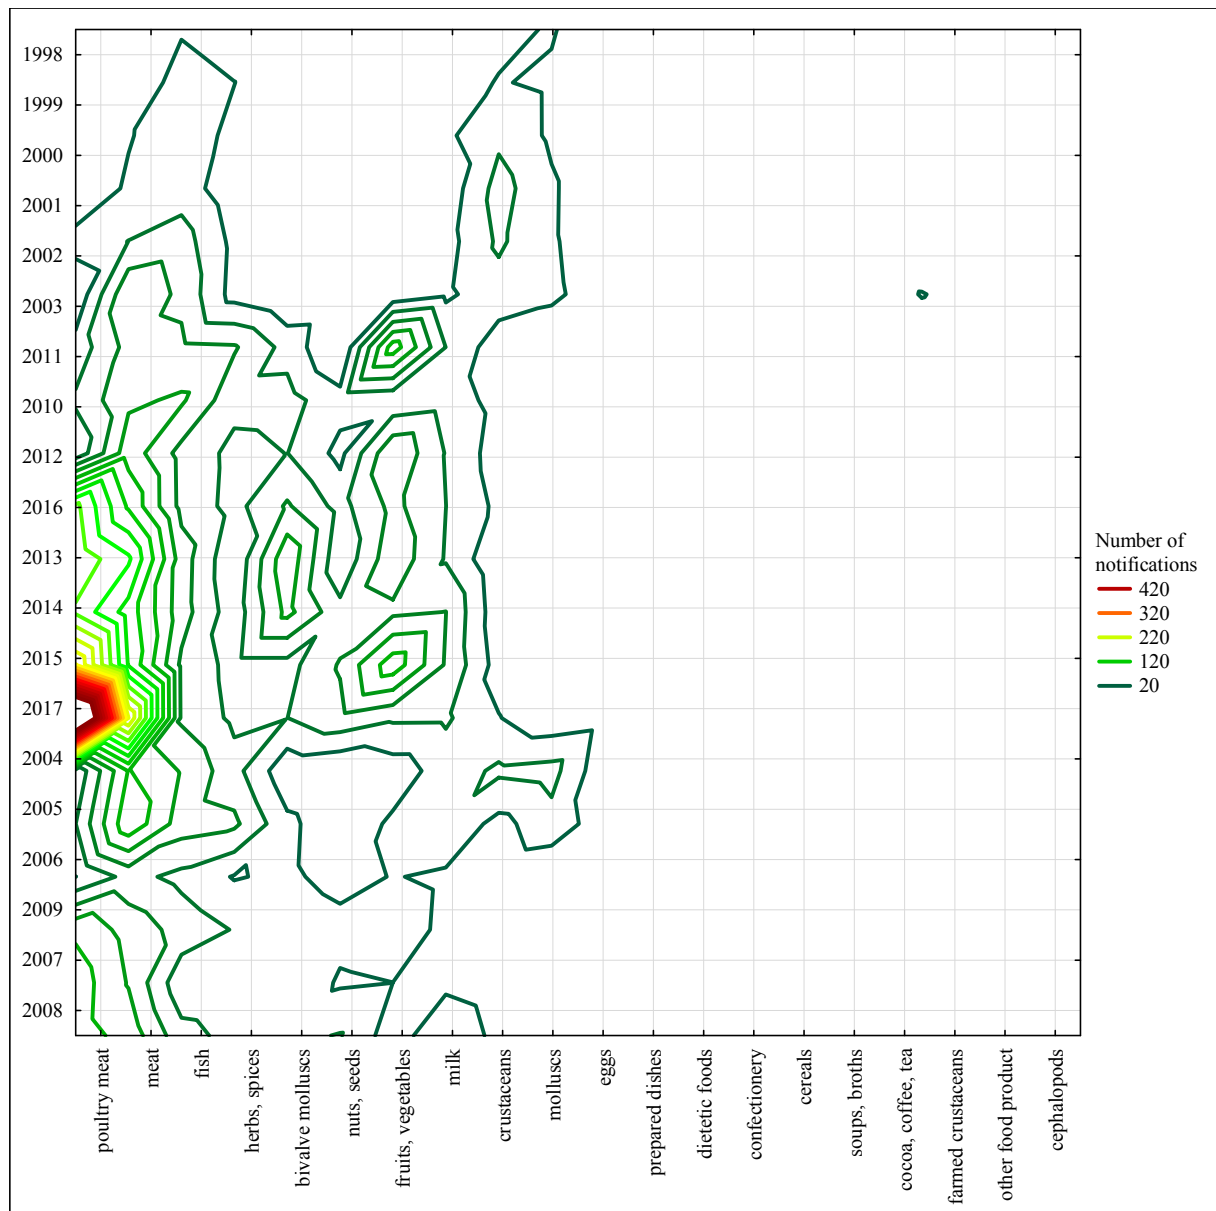

bivalve molluscs – bivalve molluscs and products thereof  
 cephalopods – cephalopods and products thereof  
 cereals – cereals and bakery products  
 cocoa, coffee, tea – cocoa and cocoa preparations, coffee and tea  
 crustaceans – crustaceans and products thereof  
 dietetic foods – dietetic foods, food supplements, fortified foods  
 eggs – eggs and egg products  
 farmed crustaceans – farmed crustaceans and products thereof - (obsolete)  
 fish – fish and fish products  
 fruits, vegetables – fruits and vegetables  
 herbs, spices – herbs and spices  
 meat – meat and meat products (other than poultry)  
 milk – milk and milk products  
 molluscs – molluscs and products thereof - (obsolete)  
 nuts, seedsnuts, nut products and seeds  
 other food product – other food product / mixed  
 poultry meat – poultry meat and poultry meat products  
 prepared dishes – prepared dishes and snacks  
 soups, broths – soups, broths, sauces and condiments

**FIGURE S18** Similarities between product category and year within notifications on pathogenic micro-organisms.

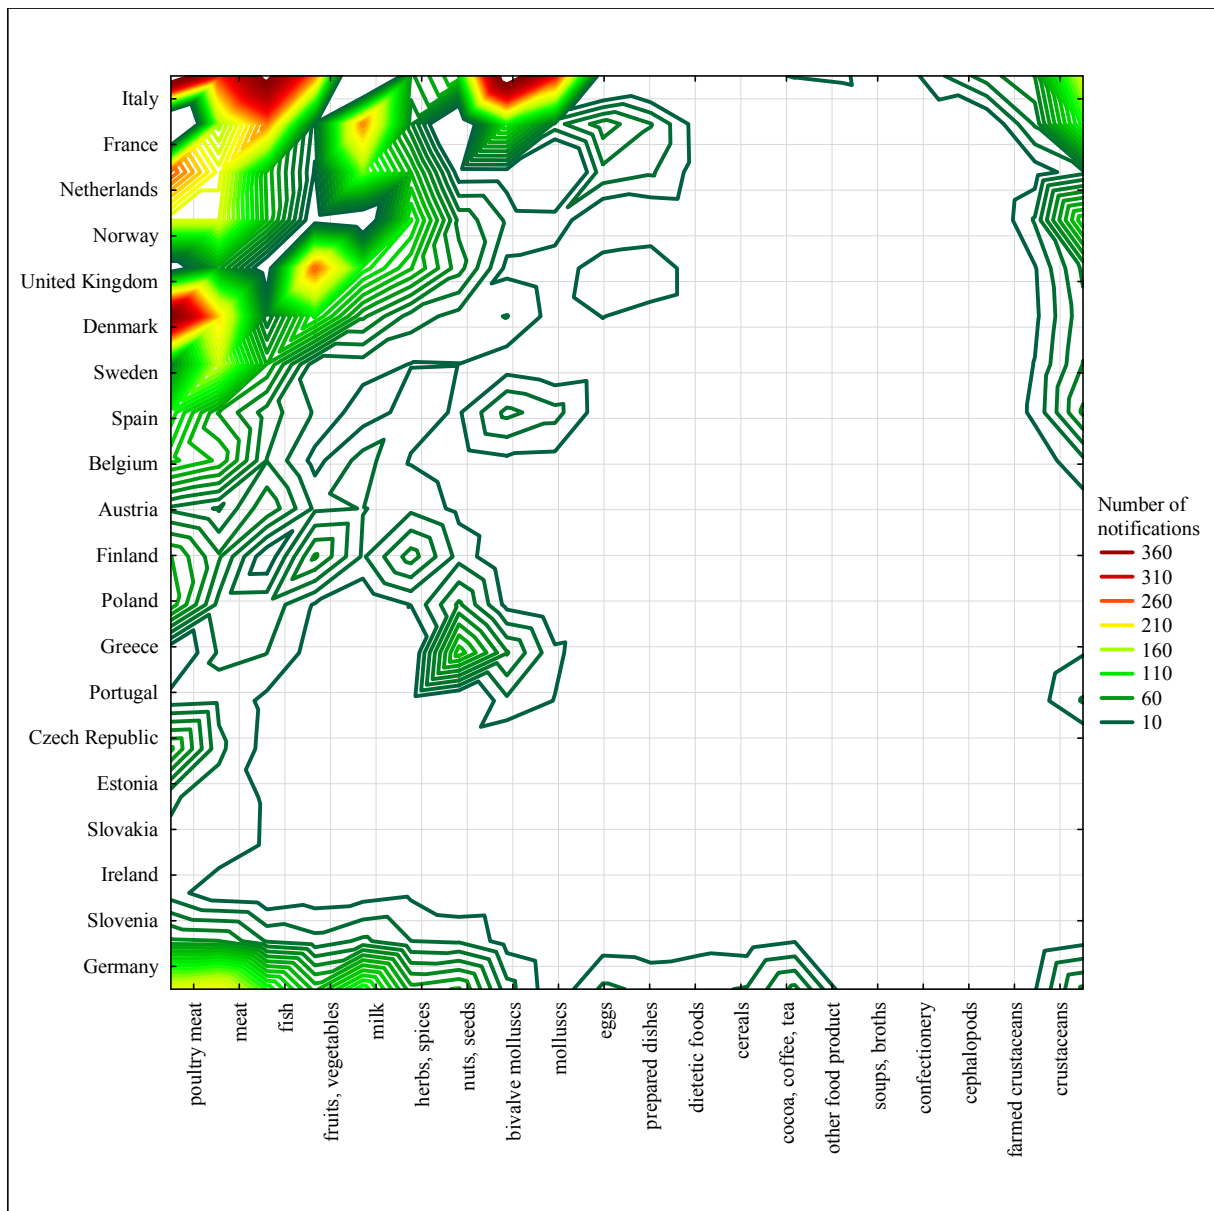

bivalve molluscs – bivalve molluscs and products thereof  
 cephalopods – cephalopods and products thereof  
 cereals – cereals and bakery products  
 cocoa, coffee, tea – cocoa and cocoa preparations, coffee and tea  
 crustaceans – crustaceans and products thereof  
 dietetic foods – dietetic foods, food supplements, fortified foods  
 eggs – eggs and egg products  
 farmed crustaceans – farmed crustaceans and products thereof - (obsolete)  
 fish – fish and fish products  
 fruits, vegetables – fruits and vegetables  
 herbs, spices – herbs and spices  
 meat – meat and meat products (other than poultry)  
 milk – milk and milk products  
 molluscs – molluscs and products thereof - (obsolete)  
 nuts, seedsnuts, nut products and seeds  
 other food product – other food product / mixed  
 poultry meat – poultry meat and poultry meat products  
 prepared dishes – prepared dishes and snacks  
 soups, broths – soups, broths, sauces and condiments

**FIGURE S19** Similarities between product category and notifying country within notifications on pathogenic micro-organisms.

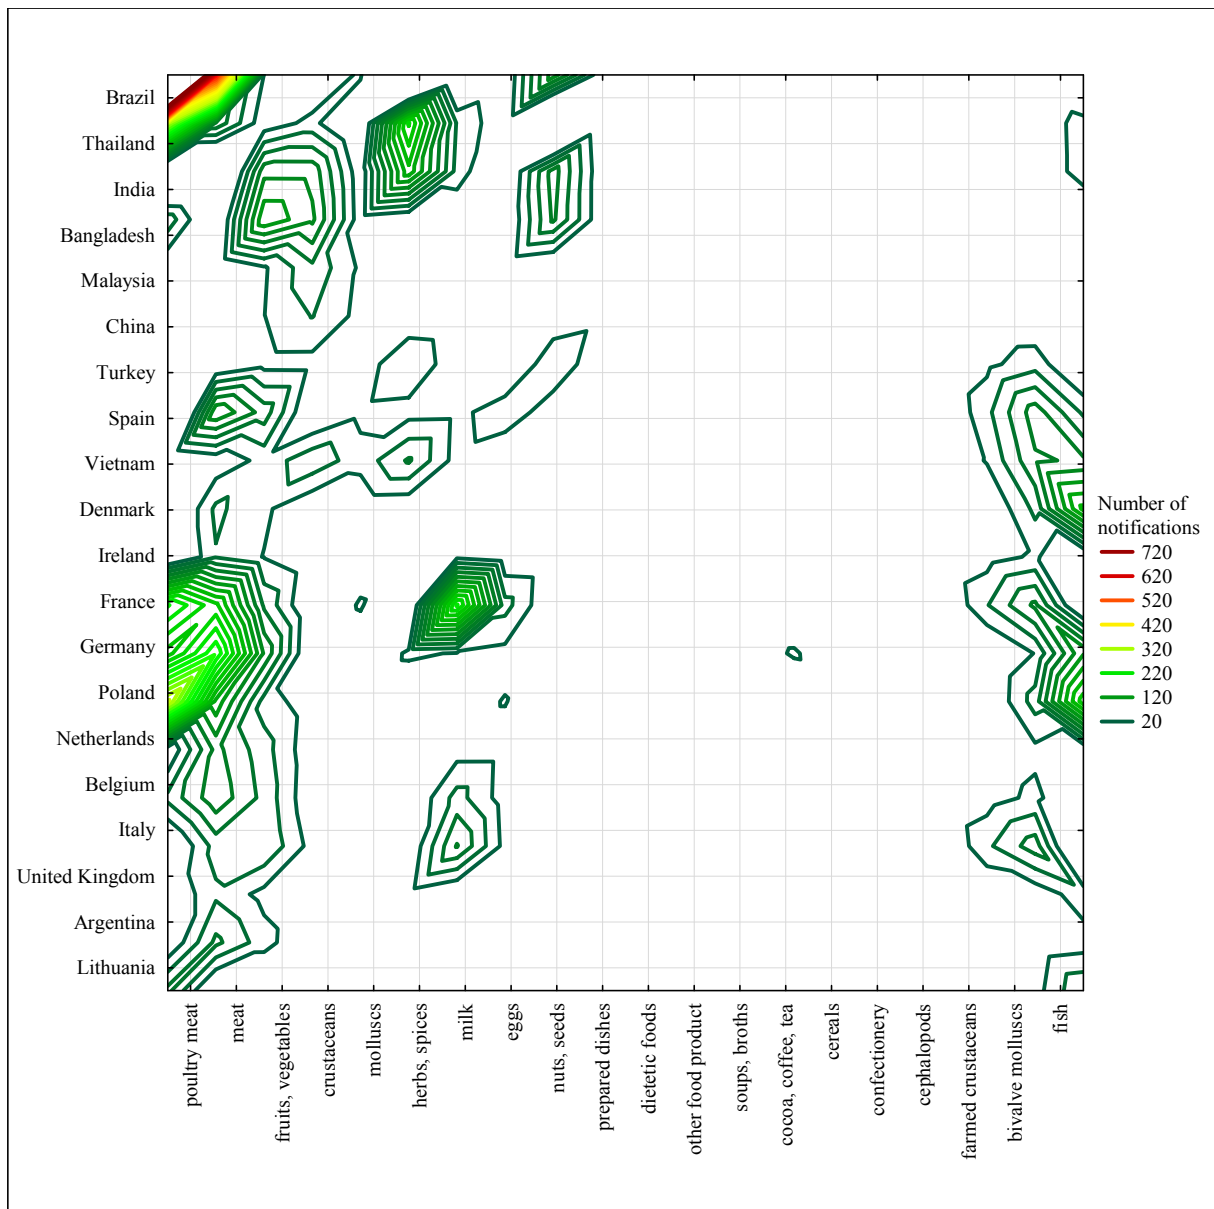

bivalve molluscs – bivalve molluscs and products thereof  
cephalopods – cephalopods and products thereof  
cereals – cereals and bakery products  
cocoa, coffee, tea – cocoa and cocoa preparations, coffee and tea  
crustaceans – crustaceans and products thereof  
dietetic foods – dietetic foods, food supplements, fortified foods  
eggs – eggs and egg products  
farmed crustaceans – farmed crustaceans and products thereof - (obsolete)  
fish – fish and fish products  
fruits, vegetables – fruits and vegetables  
herbs, spices – herbs and spices  
meat – meat and meat products (other than poultry)  
milk – milk and milk products  
molluscs – molluscs and products thereof - (obsolete)  
nuts, seeds – nuts, nut products and seeds  
other food product – other food product / mixed  
poultry meat – poultry meat and poultry meat products  
prepared dishes – prepared dishes and snacks  
soups, broths – soups, broths, sauces and condiments

**FIGURE S20** Similarities between product category and origin country within notifications on pathogenic micro-organisms.

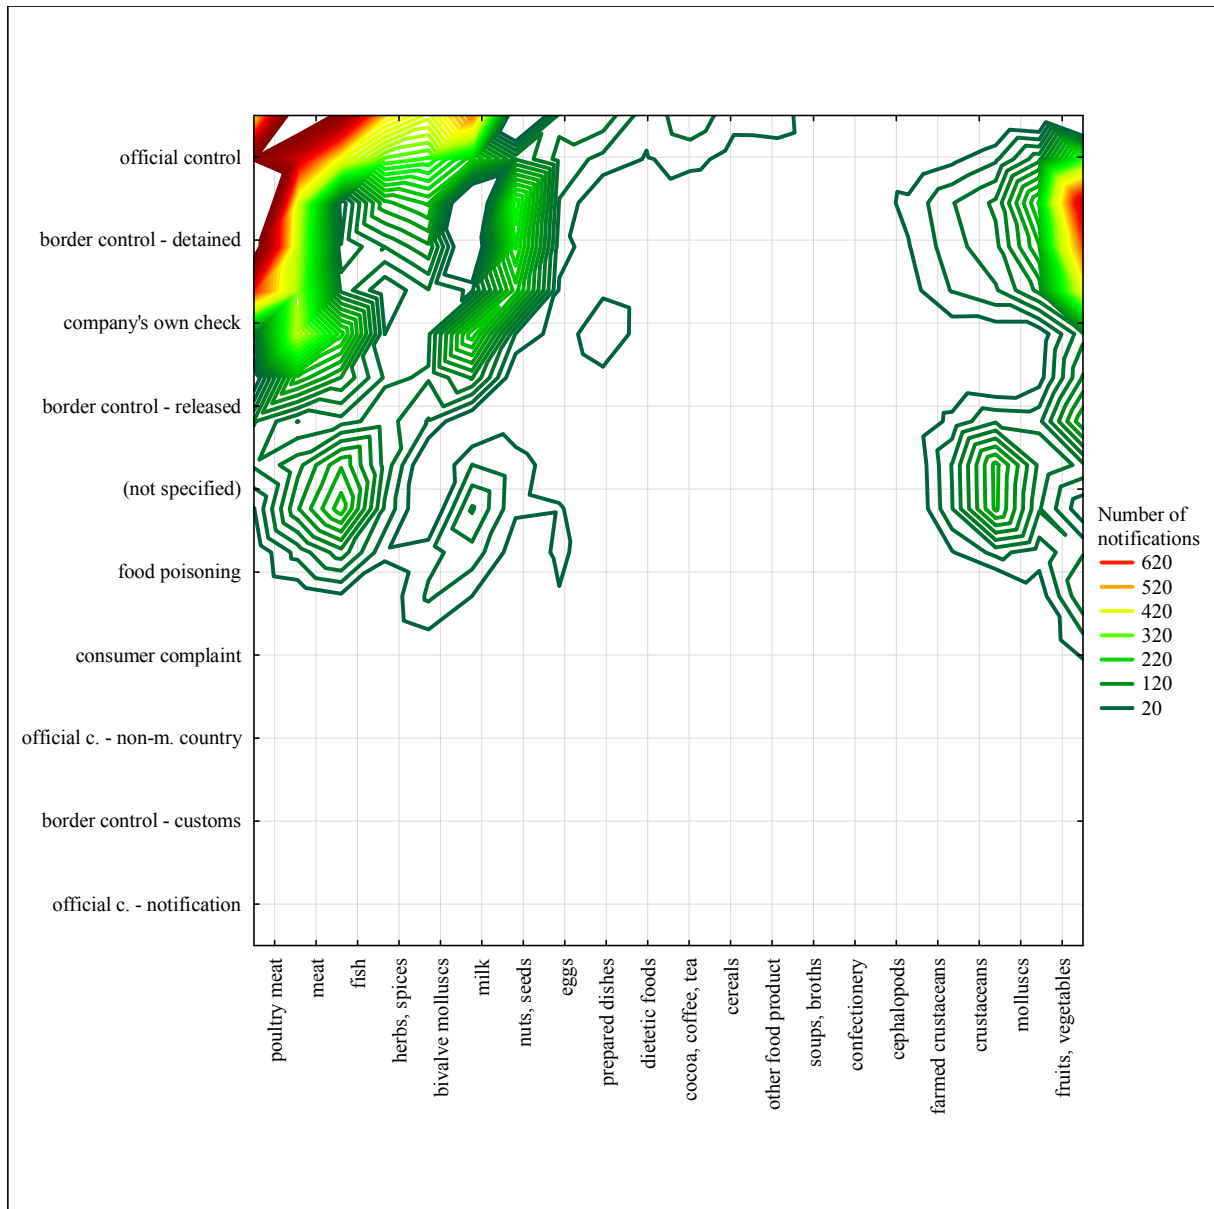

bivalve molluscs – bivalve molluscs and products thereof  
 cephalopods – cephalopods and products thereof  
 cereals – cereals and bakery products  
 cocoa, coffee, tea – cocoa and cocoa preparations, coffee and tea  
 crustaceans – crustaceans and products thereof  
 dietetic foods – dietetic foods, food supplements, fortified foods  
 eggs – eggs and egg products  
 farmed crustaceans – farmed crustaceans and products thereof - (obsolete)  
 fish – fish and fish products  
 fruits, vegetables – fruits and vegetables  
 herbs, spices – herbs and spices  
 meat – meat and meat products (other than poultry)  
 milk – milk and milk products  
 molluscs – molluscs and products thereof - (obsolete)  
 nuts, seeds – nuts, nut products and seeds  
 other food product – other food product / mixed  
 poultry meat – poultry meat and poultry meat products  
 prepared dishes – prepared dishes and snacks  
 soups, broths – soups, broths, sauces and condiments  
  
 border control - customs – border control - consignment under customs  
 border control - detained – border control - consignment detained  
 border control - released – border control - consignment released  
 official c. - non-m. country – official control in non-member country  
 official c. - notification – official control following RASFF notification  
 official control – official control on the market

**FIGURE S21** Similarities between product category and notification basis within notifications on pathogenic micro-organisms.

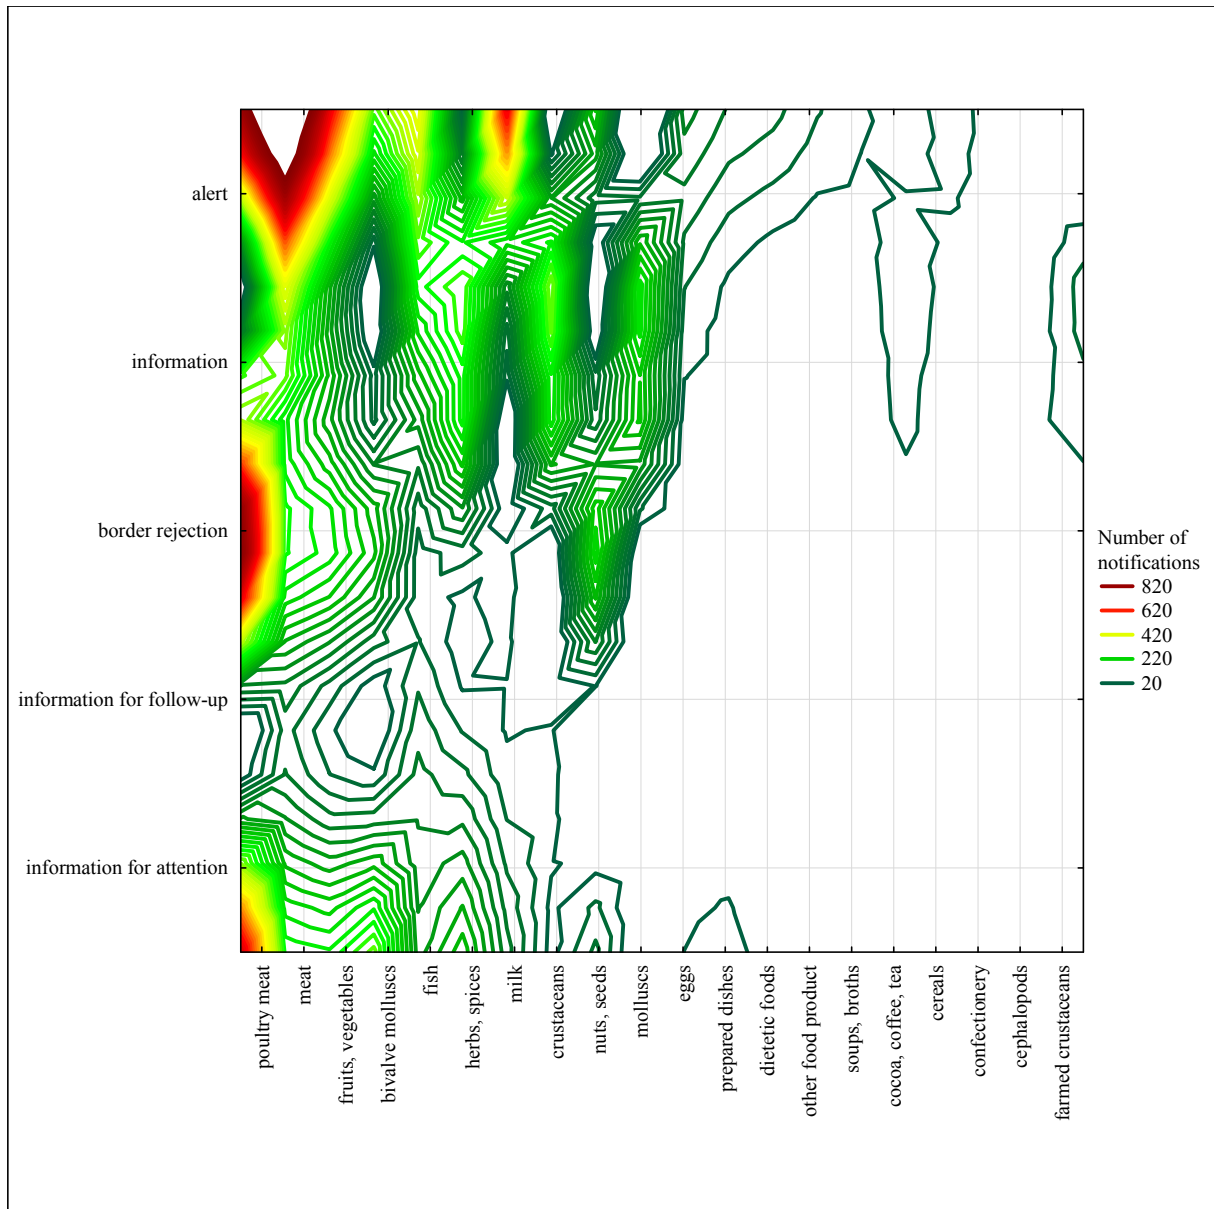

bivalve molluscs – bivalve molluscs and products thereof  
 cephalopods – cephalopods and products thereof  
 cereals – cereals and bakery products  
 cocoa, coffee, tea – cocoa and cocoa preparations, coffee and tea  
 crustaceans – crustaceans and products thereof  
 dietetic foods – dietetic foods, food supplements, fortified foods  
 eggs – eggs and egg products  
 farmed crustaceans – farmed crustaceans and products thereof - (obsolete)  
 fish – fish and fish products  
 fruits, vegetables – fruits and vegetables  
 herbs, spices – herbs and spices  
 meat – meat and meat products (other than poultry)  
 milk – milk and milk products  
 molluscs – molluscs and products thereof - (obsolete)  
 nuts, seeds – nuts, nut products and seeds  
 other food product – other food product / mixed  
 poultry meat – poultry meat and poultry meat products  
 prepared dishes – prepared dishes and snacks  
 soups, broths – soups, broths, sauces and condiments

**FIGURE S22** Similarities between product category and notification type within notifications on pathogenic micro-organisms.

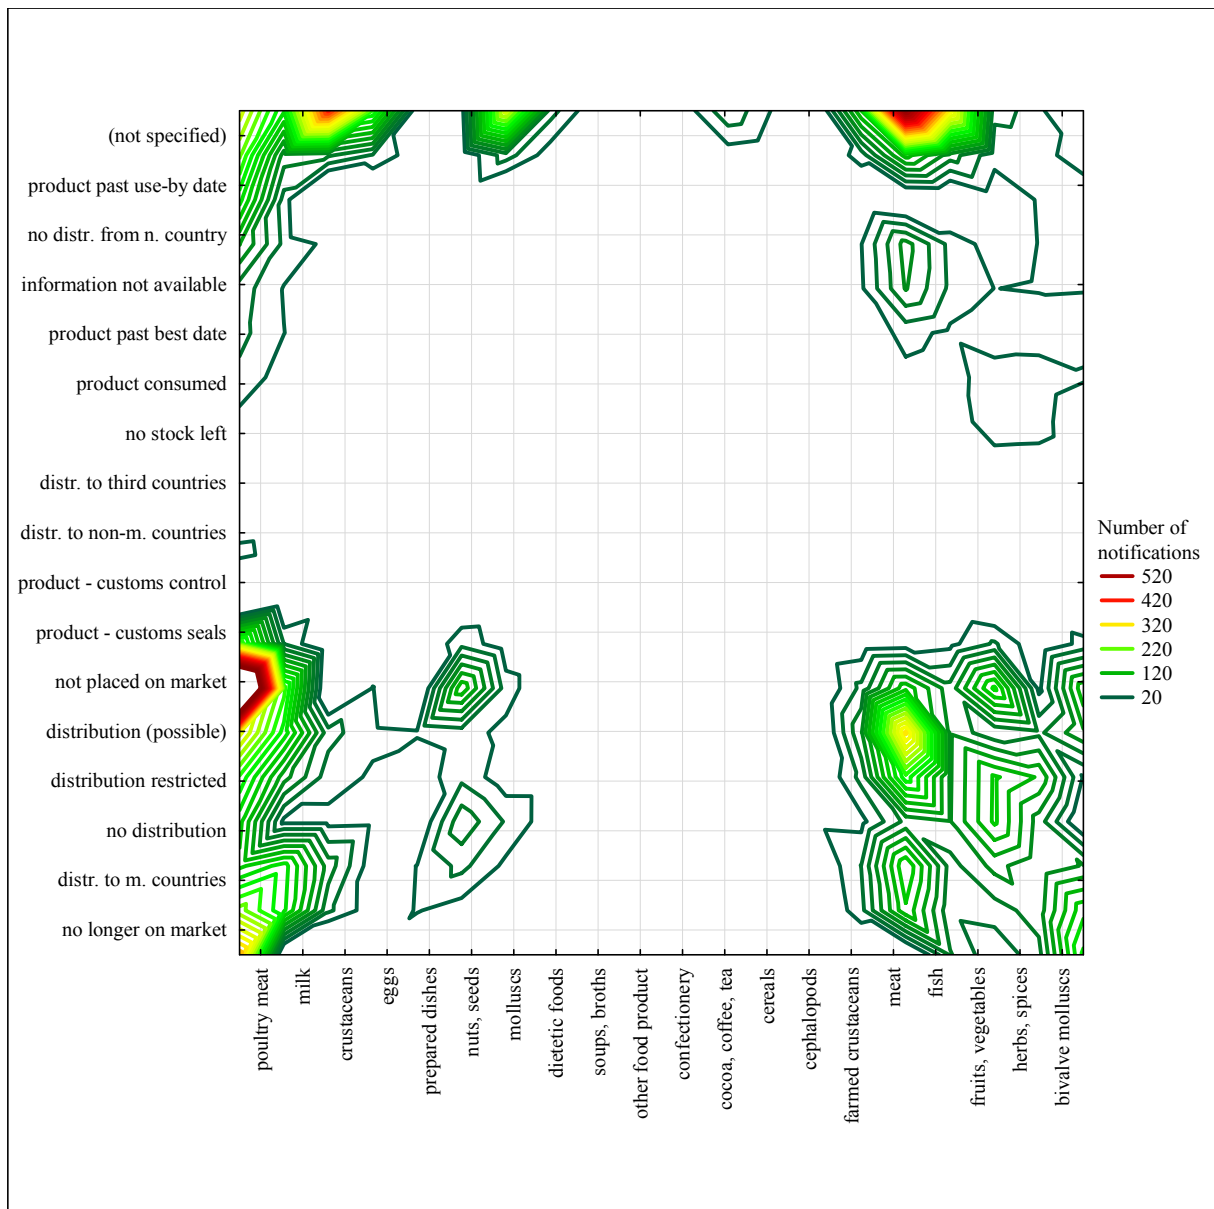

bivalve molluscs – bivalve molluscs and products thereof  
 cephalopods – cephalopods and products thereof  
 cereals – cereals and bakery products  
 cocoa, coffee, tea – cocoa and cocoa preparations, coffee and tea  
 crustaceans – crustaceans and products thereof  
 dietetic foods – dietetic foods, food supplements, fortified foods  
 eggs – eggs and egg products  
 farmed crustaceans – farmed crustaceans and products thereof - (obsolete)  
 fish – fish and fish products  
 fruits, vegetables – fruits and vegetables  
 herbs, spices – herbs and spices  
 meat – meat and meat products (other than poultry)  
 milk – milk and milk products  
 molluscs – molluscs and products thereof - (obsolete)  
 nuts, seeds – nuts, nut products and seeds  
 other food product – other food product / mixed  
 poultry meat – poultry meat and poultry meat products  
 prepared dishes – prepared dishes and snacks

soups, broths – soups, broths, sauces and condiments  
 distr. to m. countries – distribution to other member countries  
 distr. to non-m. countries – distribution to non-member countries  
 distr. to third countries – distribution to third countries  
 distribution (possible) – distribution on the market (possible)  
 distribution restricted – distribution restricted to notifying country  
 information not available – information on distribution not (yet) available  
 no distr. from n. country – no distribution from notifying country  
 no longer on market – product (presumably) no longer on the market  
 not placed on market – product not (yet) placed on the market  
 product - customs seals – product allowed to travel to destination under customs seals  
 product consumed – product already consumed  
 product - customs control – product under customs control  
 product past best date – product past best before date

**FIGURE S23** Similarities between product category and distribution status within notifications on pathogenic micro-organisms.

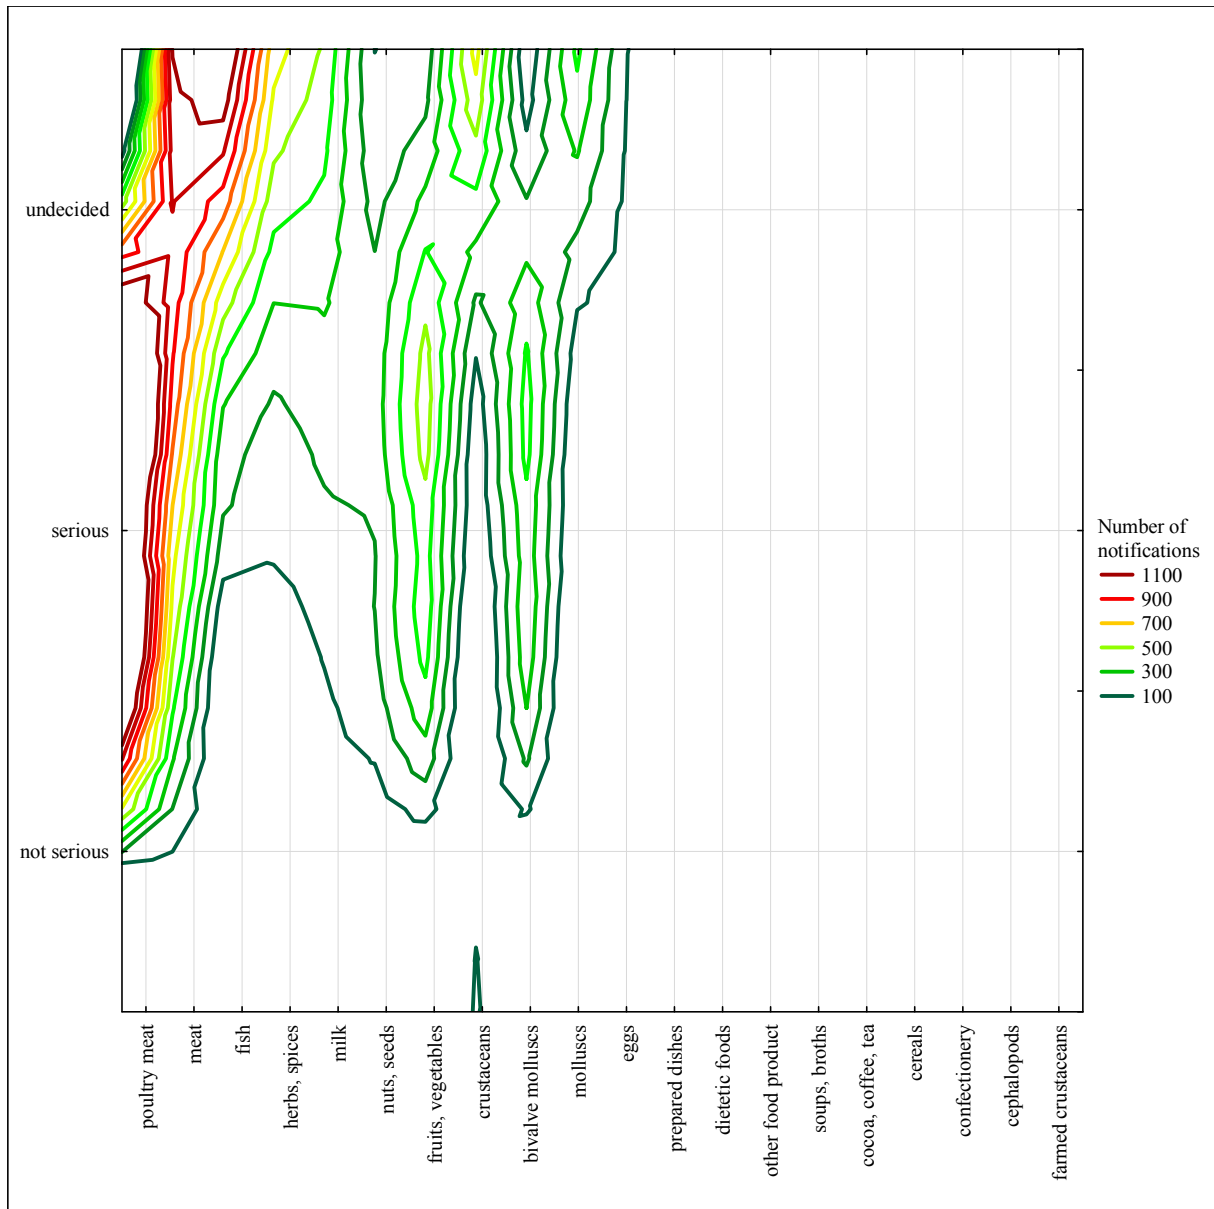

bivalve molluscs – bivalve molluscs and products thereof  
 cephalopods – cephalopods and products thereof  
 cereals – cereals and bakery products  
 cocoa, coffee, tea – cocoa and cocoa preparations, coffee and tea  
 crustaceans – crustaceans and products thereof  
 dietetic foods – dietetic foods, food supplements, fortified foods  
 eggs – eggs and egg products  
 farmed crustaceans – farmed crustaceans and products thereof - (obsolete)  
 fish – fish and fish products  
 fruits, vegetables – fruits and vegetables  
 herbs, spices – herbs and spices  
 meat – meat and meat products (other than poultry)  
 milk – milk and milk products  
 molluscs – molluscs and products thereof - (obsolete)  
 nuts, seeds nuts, nut products and seeds  
 other food product – other food product / mixed  
 poultry meat – poultry meat and poultry meat products  
 prepared dishes – prepared dishes and snacks  
 soups, broths – soups, broths, sauces and condiments

**FIGURE S24** Similarities between product category and risk decision within notifications on pathogenic micro-organisms.



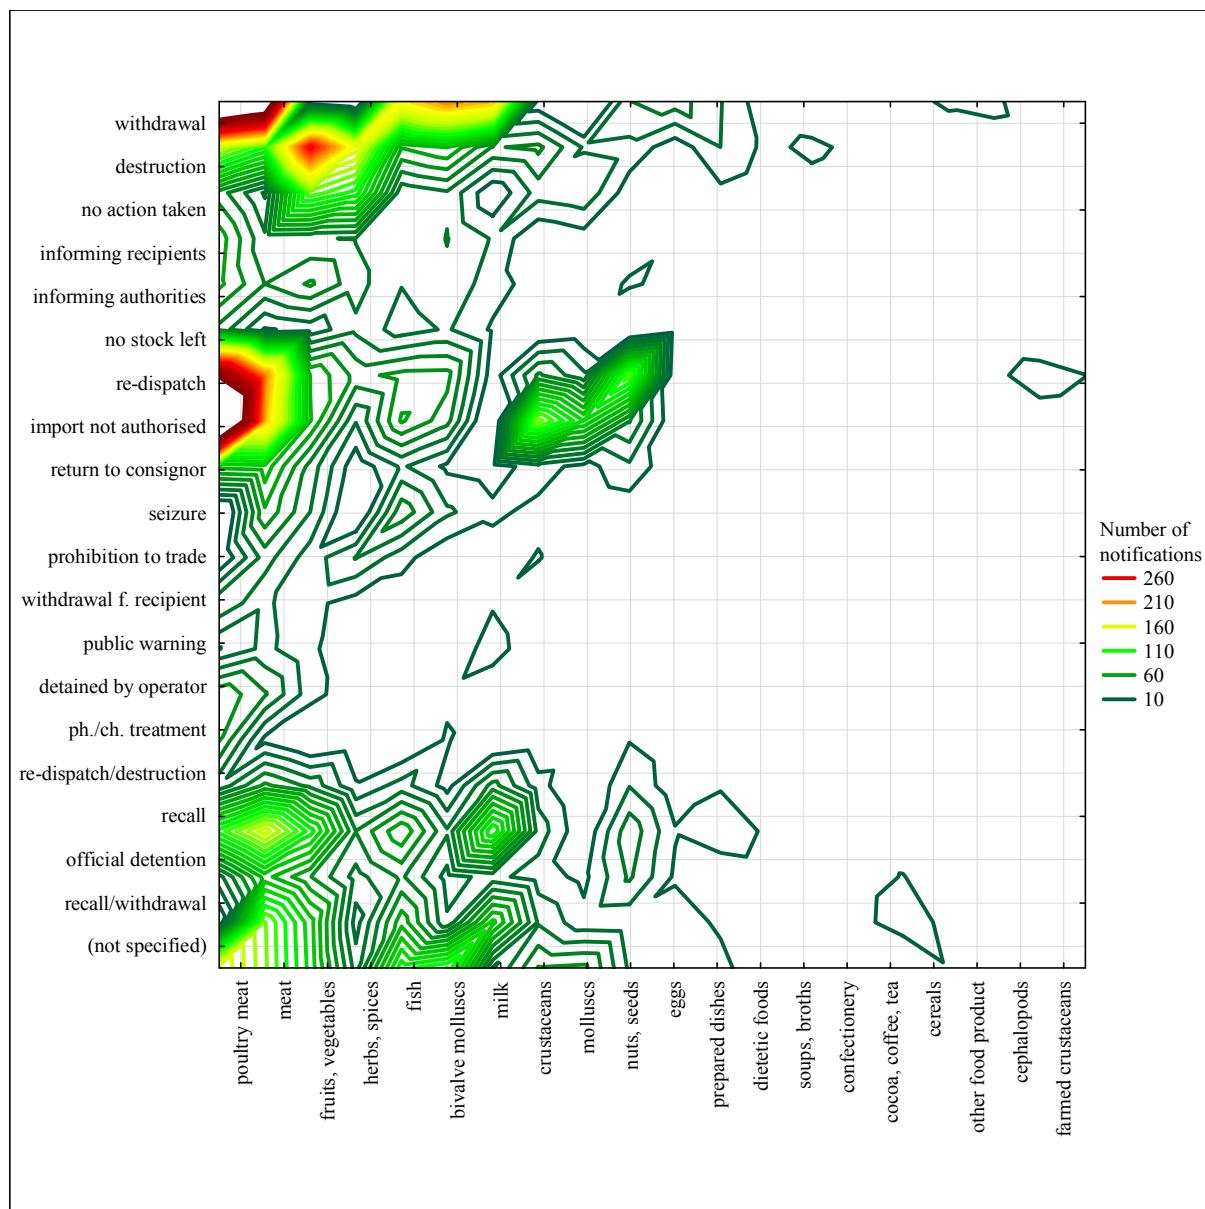

bivalve molluscs – bivalve molluscs and products thereof  
 cephalopods – cephalopods and products thereof  
 cereals – cereals and bakery products  
 cocoa, coffee, tea – cocoa and cocoa preparations, coffee and tea  
 crustaceans – crustaceans and products thereof  
 dietetic foods – dietetic foods, food supplements, fortified foods  
 eggs – eggs and egg products  
 farmed crustaceans – farmed crustaceans and products thereof - (obsolete)  
 fish – fish and fish products  
 fruits, vegetables – fruits and vegetables  
 herbs, spices – herbs and spices  
 meat – meat and meat products (other than poultry)  
 milk – milk and milk products  
 molluscs – molluscs and products thereof - (obsolete)

nuts, seedsnuts, nut products and seeds  
 other food product – other food product / mixed  
 poultry meat – poultry meat and poultry meat products  
 prepared dishes – prepared dishes and snacks  
 soups, broths – soups, broths, sauces and condiments

ph./ch. treatment – physical/chemical treatment  
 prohibition to trade – prohibition to trade - sales ban  
 public warning – public warning - press release  
 recall – recall from consumers  
 recall/withdrawal – product recall or withdrawal  
 re-dispatch/destruction – re-dispatch or destruction  
 withdrawal – withdrawal from the market  
 withdrawal f. recipient – withdrawal from recipient(s)

**FIGURE S25** Similarities between product category and action taken within notifications on pathogenic micro-organisms.

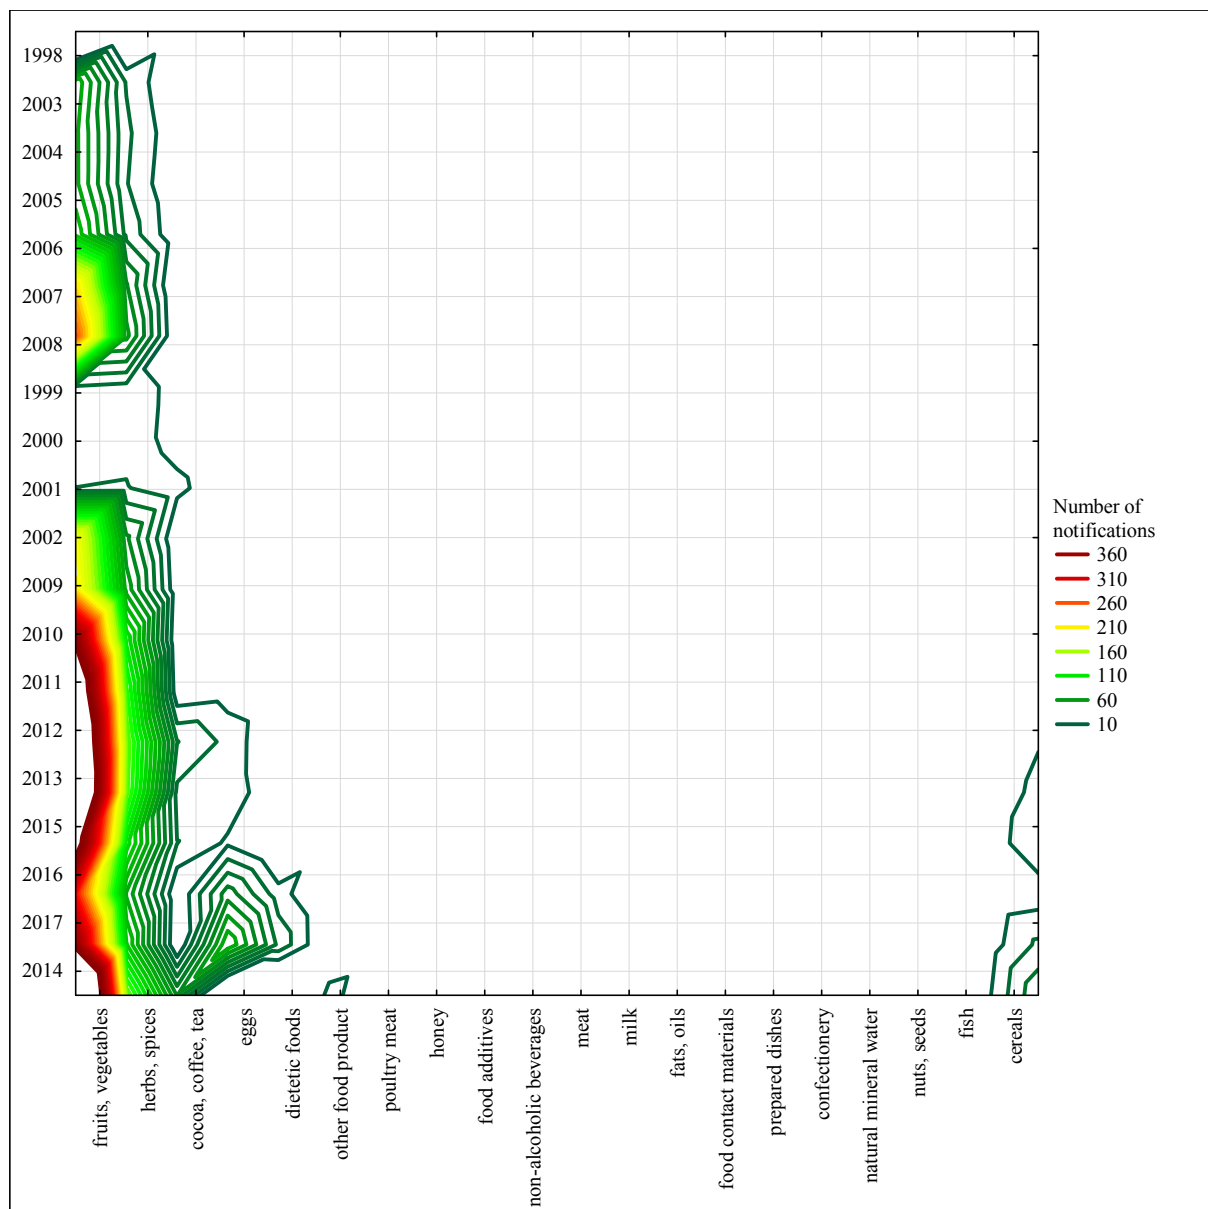

cereals – cereals and bakery products  
 cocoa, coffee, tea – cocoa and cocoa preparations, coffee and tea  
 dietetic foods – dietetic foods, food supplements, fortified foods  
 eggs – eggs and egg products  
 fats, oils – fats and oils  
 fish – fish and fish products  
 food additives – food additives and flavourings  
 fruits, vegetables – fruits and vegetables  
 herbs, spices – herbs and spices  
 honey – honey and royal jelly  
 meat – meat and meat products (other than poultry)  
 milk – milk and milk products  
 nuts, seeds – nuts, nut products and seeds  
 other food product – other food product / mixed  
 poultry meat – poultry meat and poultry meat products  
 prepared dishes – prepared dishes and snacks

**FIGURE S26** Similarities between product category and year within notifications on pesticide residues.

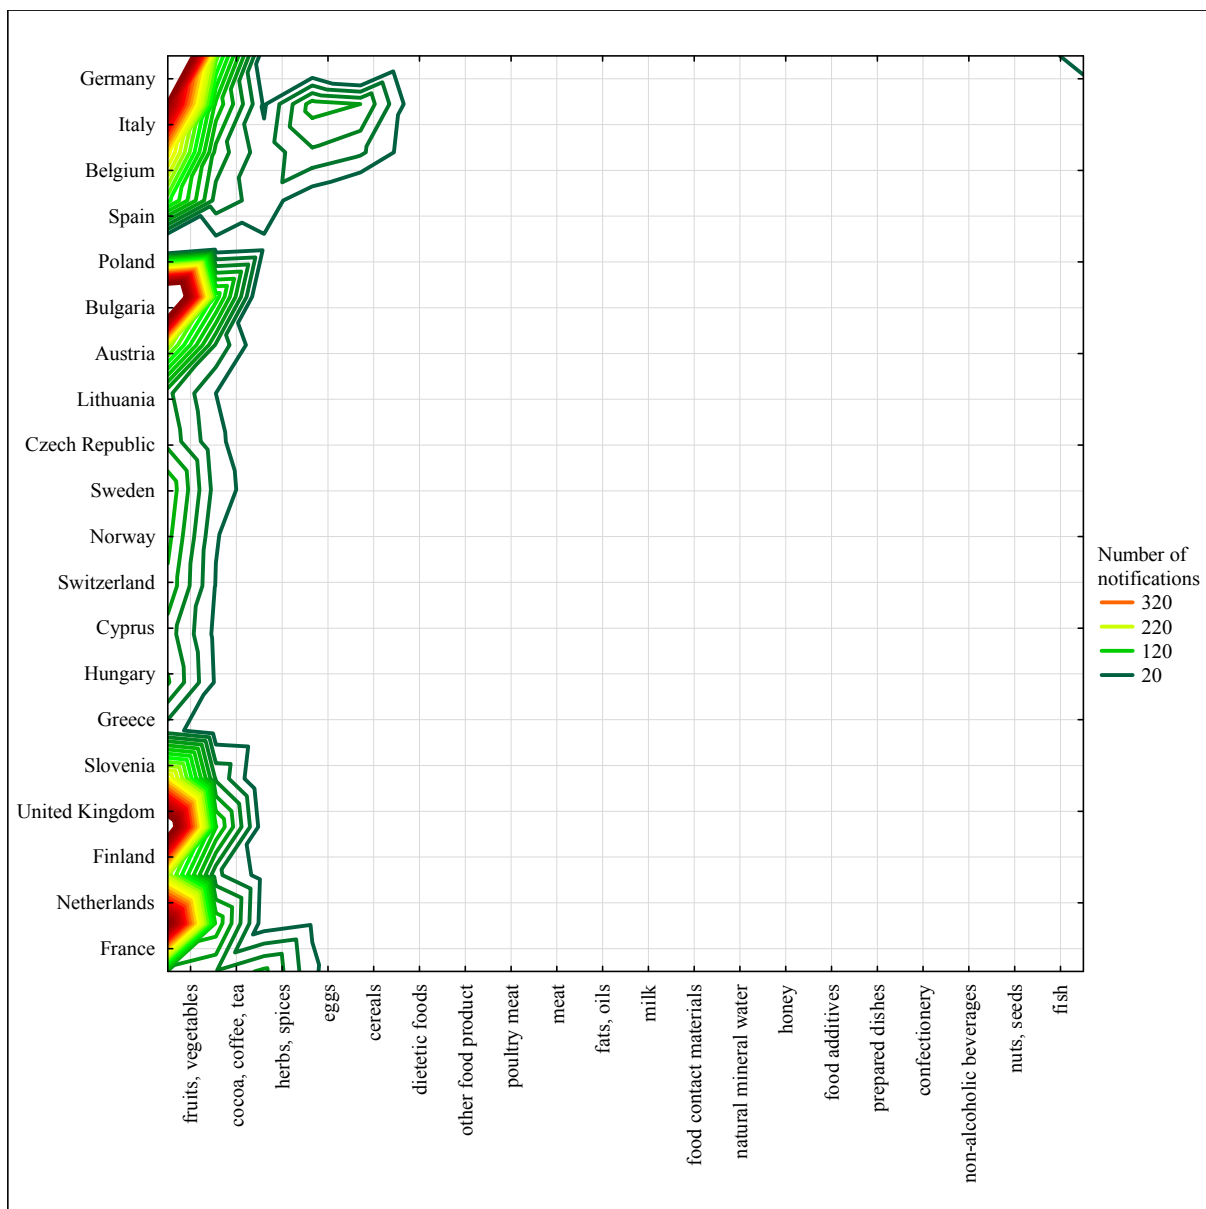

cereals – cereals and bakery products  
 cocoa, coffee, tea – cocoa and cocoa preparations, coffee and tea  
 dietetic foods – dietetic foods, food supplements, fortified foods  
 eggs – eggs and egg products  
 fats, oils – fats and oils  
 fish – fish and fish products  
 food additives – food additives and flavourings  
 fruits, vegetables – fruits and vegetables  
 herbs, spices – herbs and spices  
 honey – honey and royal jelly  
 meat – meat and meat products (other than poultry)  
 milk – milk and milk products  
 nuts, seeds – nuts, nut products and seeds  
 other food product – other food product / mixed  
 poultry meat – poultry meat and poultry meat products  
 prepared dishes – prepared dishes and snacks

**FIGURE S27** Similarities between product category and notifying country within notifications on pesticide residues.

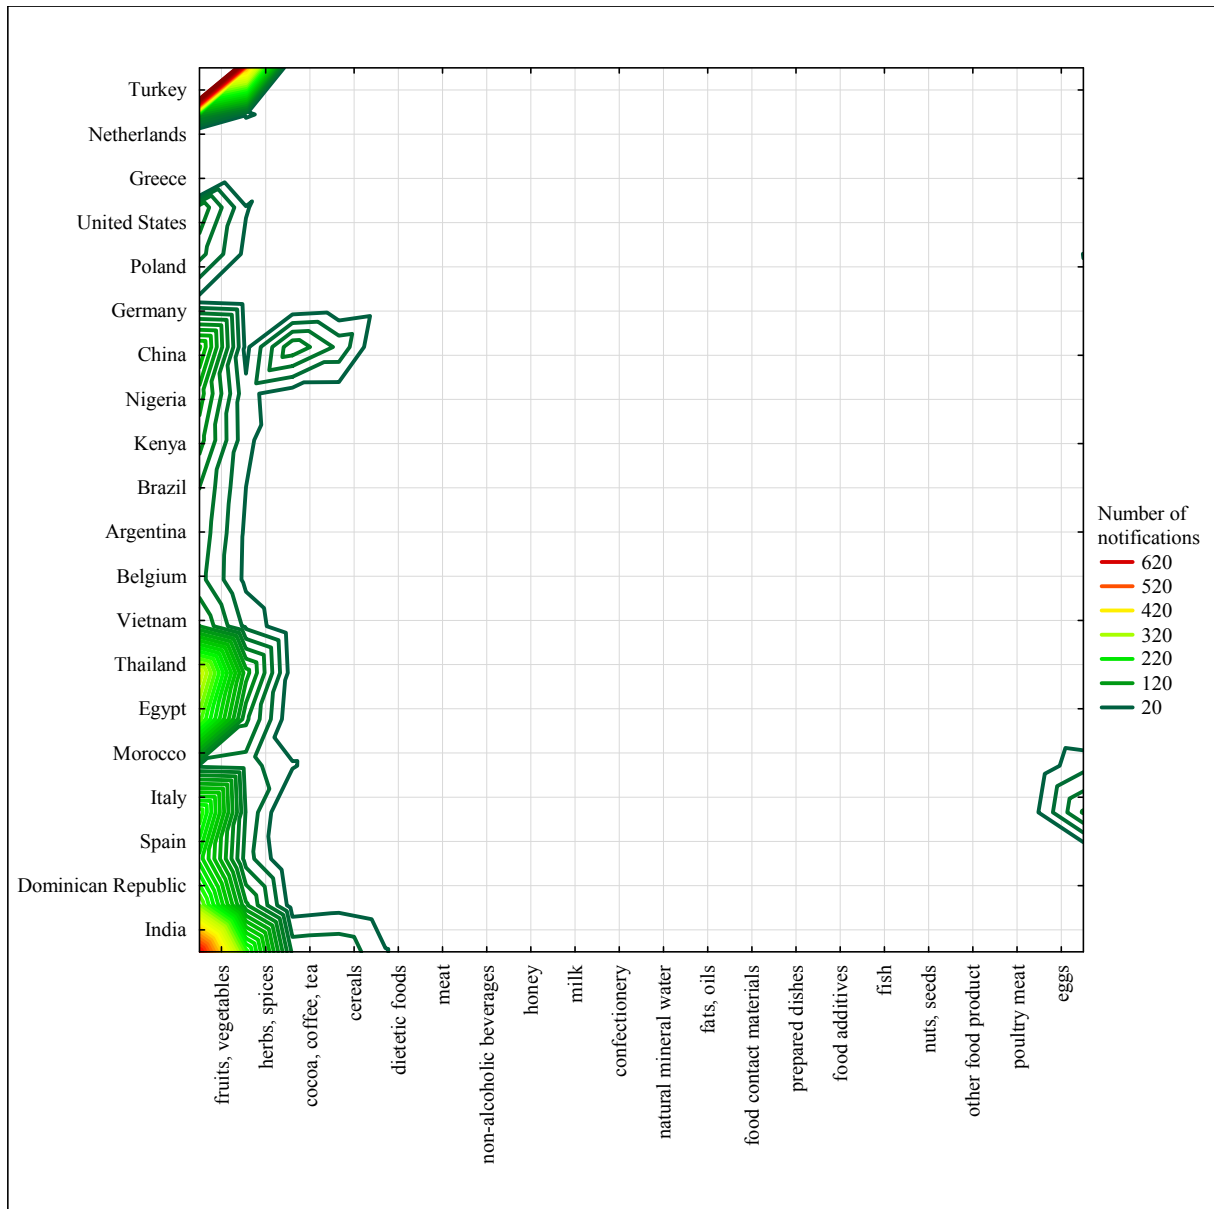

cereals – cereals and bakery products  
 cocoa, coffee, tea – cocoa and cocoa preparations, coffee and tea  
 dietetic foods – dietetic foods, food supplements, fortified foods  
 eggs – eggs and egg products  
 fats, oils – fats and oils  
 fish – fish and fish products  
 food additives – food additives and flavourings  
 fruits, vegetables – fruits and vegetables  
 herbs, spices – herbs and spices  
 honey – honey and royal jelly  
 meat – meat and meat products (other than poultry)  
 milk – milk and milk products  
 nuts, seeds – nuts, nut products and seeds  
 other food product – other food product / mixed  
 poultry meat – poultry meat and poultry meat products  
 prepared dishes – prepared dishes and snacks

**FIGURE S28** Similarities between product category and origin country within notifications on pesticide residues.

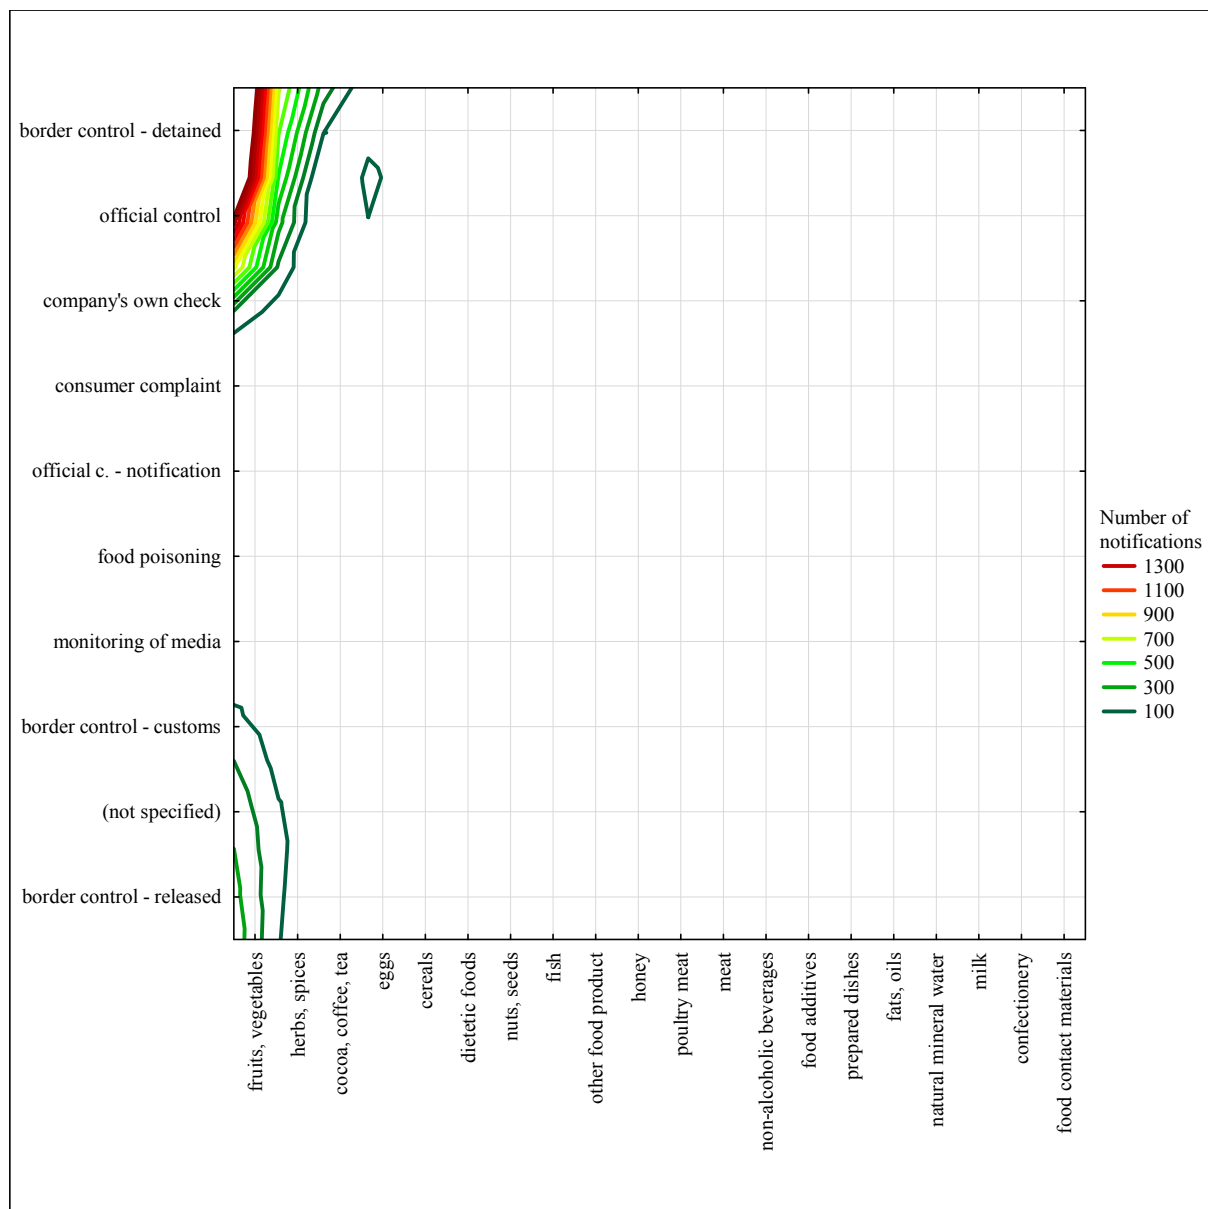

cereals – cereals and bakery products  
 cocoa, coffee, tea – cocoa and cocoa preparations, coffee and tea  
 dietetic foods – dietetic foods, food supplements, fortified foods  
 eggs – eggs and egg products  
 fats, oils – fats and oils  
 fish – fish and fish products  
 food additives – food additives and flavourings  
 fruits, vegetables – fruits and vegetables  
 herbs, spices – herbs and spices  
 honey – honey and royal jelly  
 meat – meat and meat products (other than poultry)  
 milk – milk and milk products  
 nuts, seeds – nuts, nut products and seeds  
 other food product – other food product / mixed  
 poultry meat – poultry meat and poultry meat products  
 prepared dishes – prepared dishes and snacks

border control - customs – border control - consignment under customs  
 border control - detained – border control - consignment detained  
 border control - released – border control - consignment released  
 official c. - notification – official control following RASFF notification  
 official control – official control on the market

**FIGURE S29** Similarities between product category and notification basis within notifications on pesticide residues.

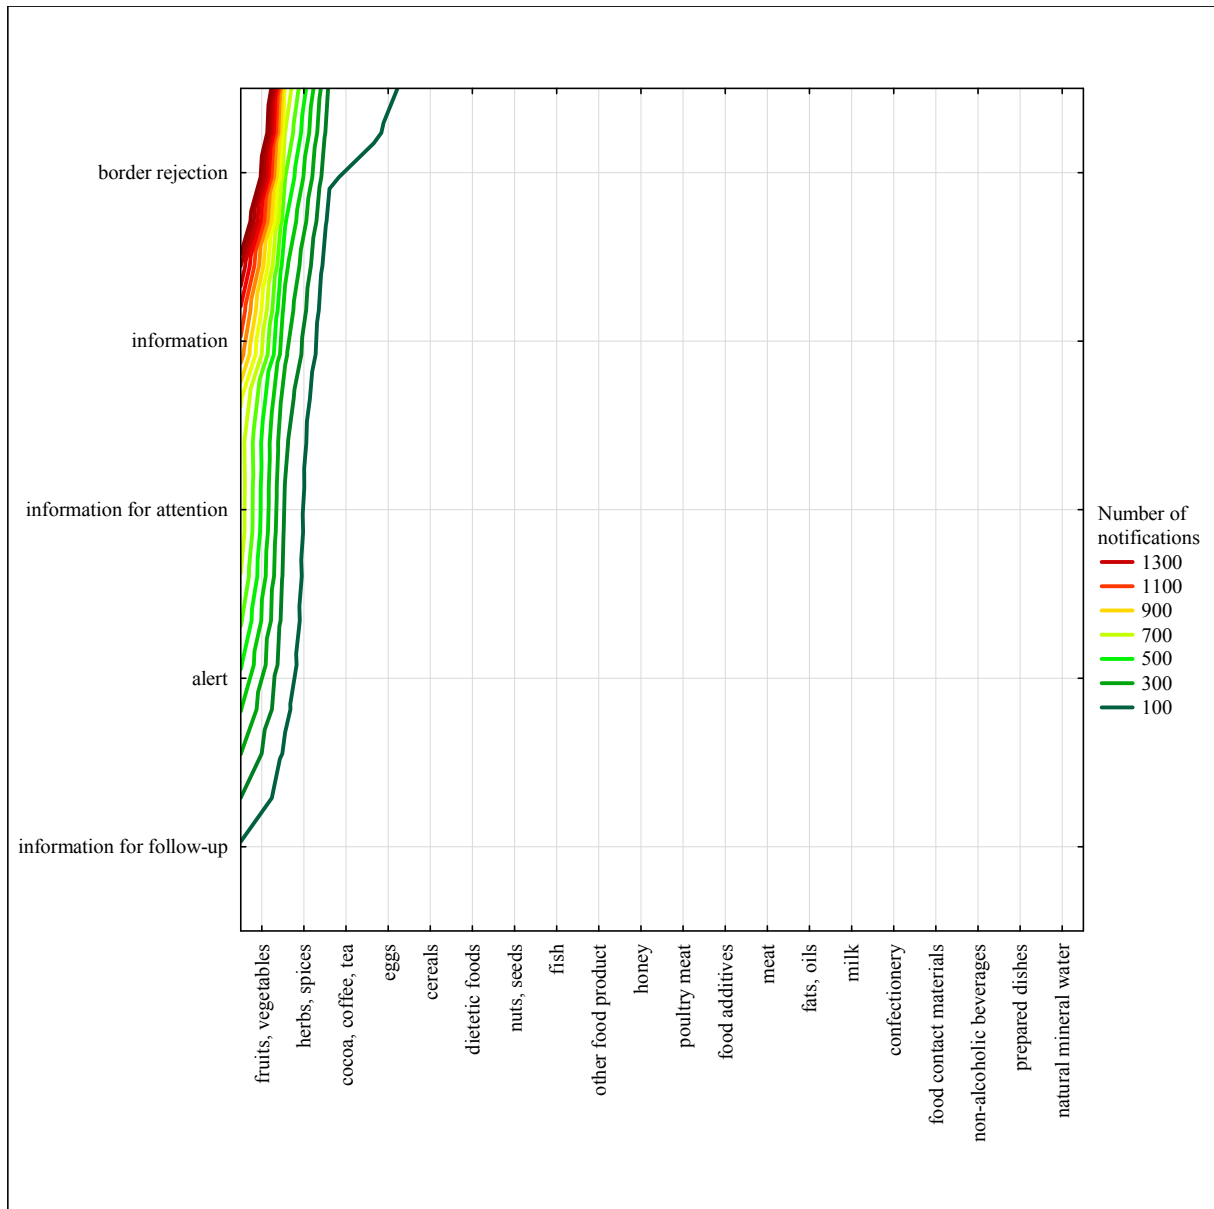

cereals – cereals and bakery products  
 cocoa, coffee, tea – cocoa and cocoa preparations, coffee and tea  
 dietetic foods – dietetic foods, food supplements, fortified foods  
 eggs – eggs and egg products  
 fats, oils – fats and oils  
 fish – fish and fish products  
 food additives – food additives and flavourings  
 fruits, vegetables – fruits and vegetables  
 herbs, spices – herbs and spices  
 honey – honey and royal jelly  
 meat – meat and meat products (other than poultry)  
 milk – milk and milk products  
 nuts, seeds – nuts, nut products and seeds  
 other food product – other food product / mixed  
 poultry meat – poultry meat and poultry meat products  
 prepared dishes – prepared dishes and snacks

**FIGURE S30** Similarities between product category and notification type within notifications on pesticide residues.

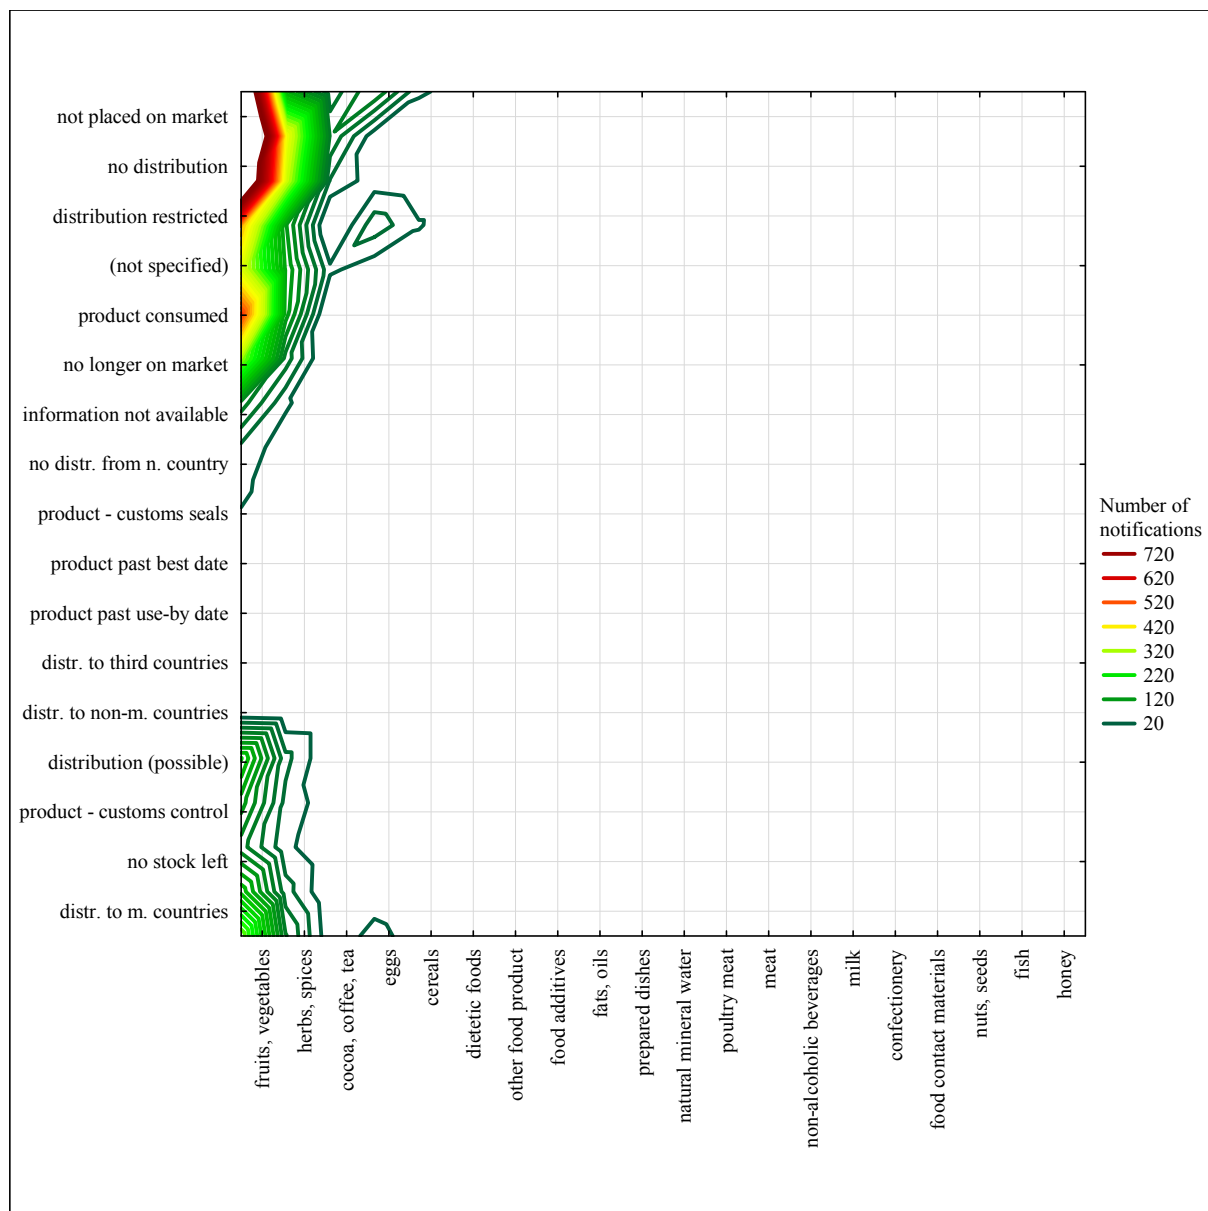

cereals – cereals and bakery products  
 cocoa, coffee, tea – cocoa and cocoa preparations, coffee and tea  
 dietetic foods – dietetic foods, food supplements, fortified foods  
 eggs – eggs and egg products  
 fats, oils – fats and oils  
 fish – fish and fish products  
 food additives – food additives and flavourings  
 fruits, vegetables – fruits and vegetables  
 herbs, spices – herbs and spices  
 honey – honey and royal jelly  
 meat – meat and meat products (other than poultry)  
 milk – milk and milk products  
 nuts, seeds – nuts, nut products and seeds  
 other food product – other food product / mixed  
 poultry meat – poultry meat and poultry meat products  
 prepared dishes – prepared dishes and snacks

distr. to m. countries – distribution to other member countries  
 distr. to non-m. countries – distribution to non-member countries  
 distr. to third countries – distribution to third countries  
 distribution (possible) – distribution on the market (possible)  
 distribution restricted – distribution restricted to notifying country  
 information not available – information on distribution not (yet) available  
 no distr. from n. country – no distribution from notifying country  
 no longer on market – product (presumably) no longer on the market  
 not placed on market – product not (yet) placed on the market  
 product - customs control – product under customs control  
 product - customs seals – product allowed to travel to destination under customs seals  
 product consumed – product already consumed  
 product past best date – product past best before date

**FIGURE S31** Similarities between product category and distribution status within notifications on pesticide residues.

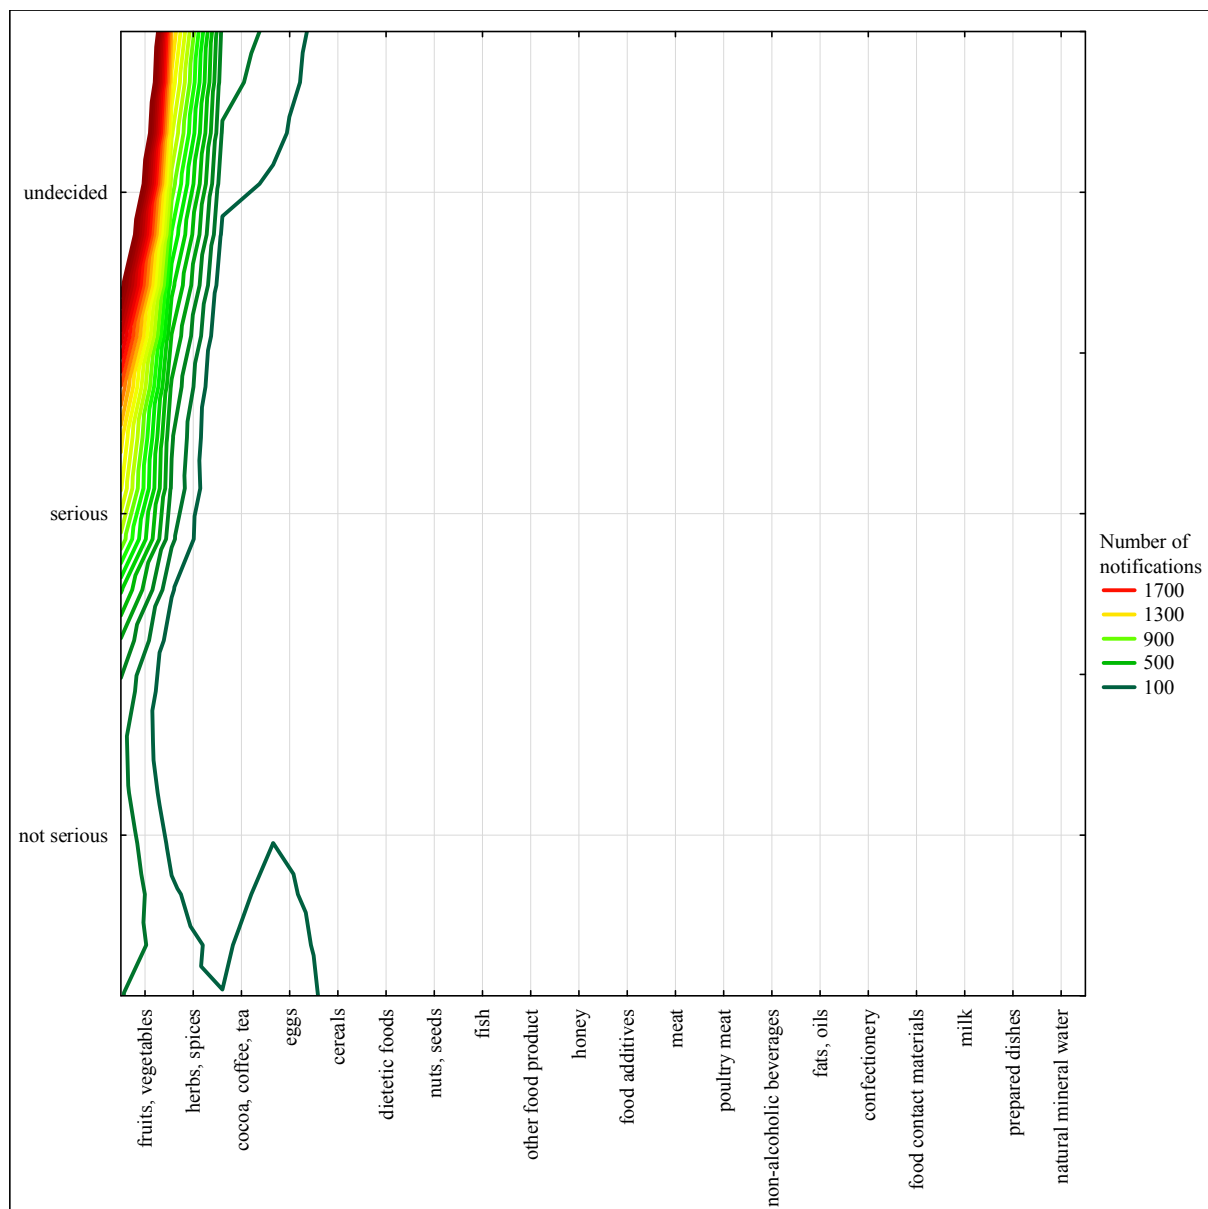

cereals – cereals and bakery products  
 cocoa, coffee, tea – cocoa and cocoa preparations, coffee and tea  
 dietetic foods – dietetic foods, food supplements, fortified foods  
 eggs – eggs and egg products  
 fats, oils – fats and oils  
 fish – fish and fish products  
 food additives – food additives and flavourings  
 fruits, vegetables – fruits and vegetables  
 herbs, spices – herbs and spices  
 honey – honey and royal jelly  
 meat – meat and meat products (other than poultry)  
 milk – milk and milk products  
 nuts, seeds – nuts, nut products and seeds  
 other food product – other food product / mixed  
 poultry meat – poultry meat and poultry meat products  
 prepared dishes – prepared dishes and snacks

**FIGURE S32** Similarities between product category and risk decision within notifications on pesticide residues.



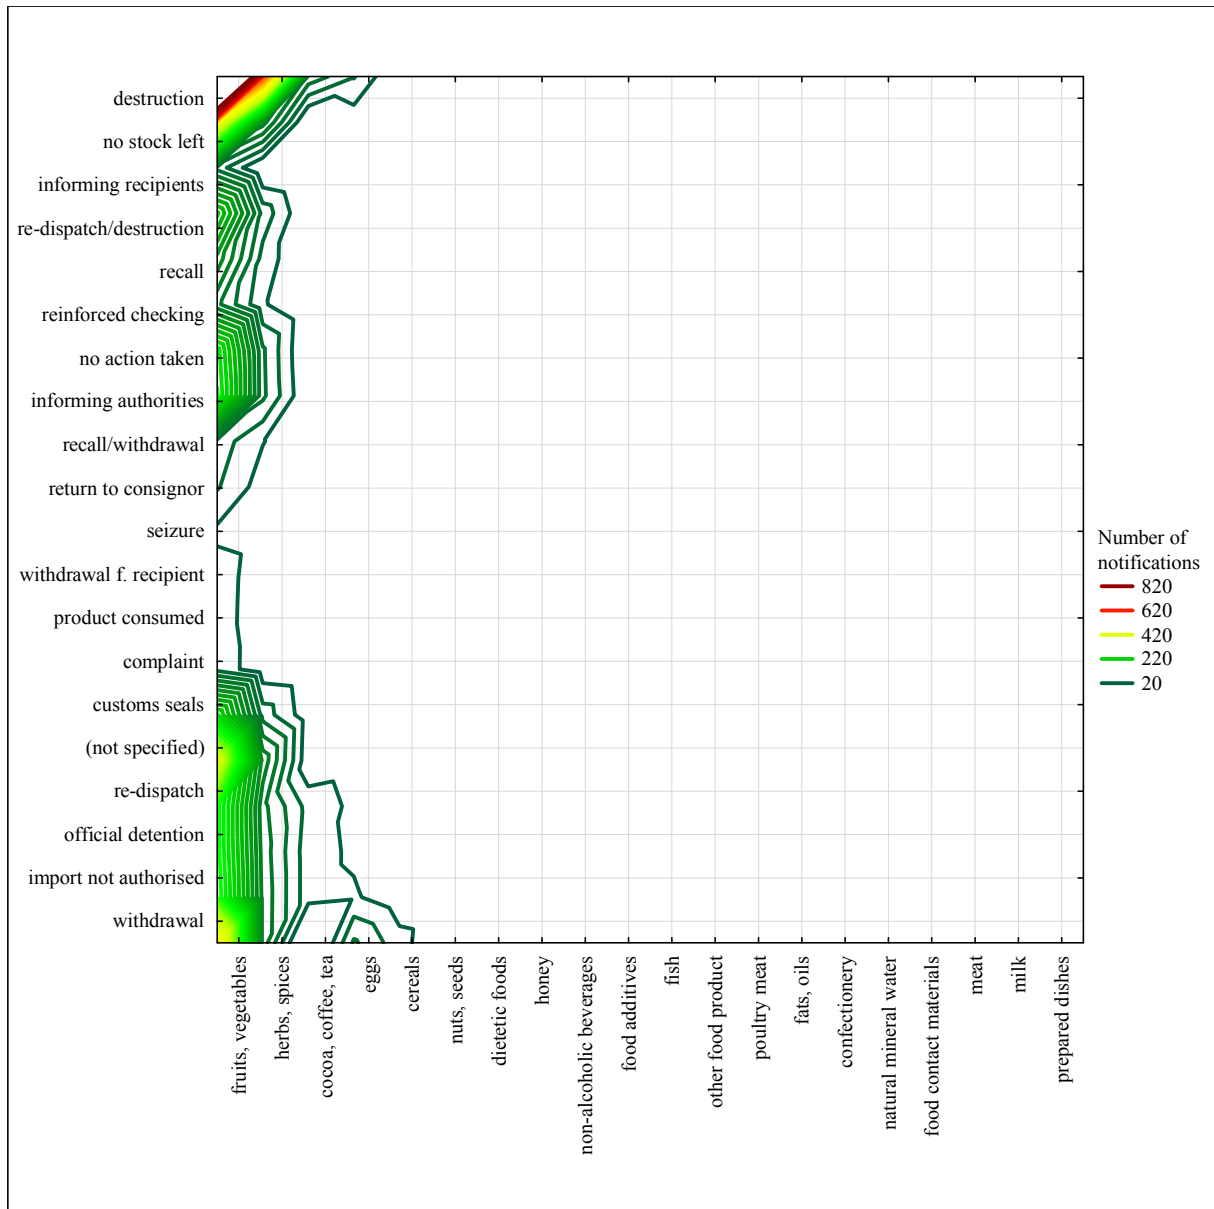

cereals – cereals and bakery products  
 cocoa, coffee, tea – cocoa and cocoa preparations, coffee and tea  
 dietetic foods – dietetic foods, food supplements, fortified foods  
 eggs – eggs and egg products  
 fats, oils – fats and oils  
 fish – fish and fish products  
 food additives – food additives and flavourings  
 fruits, vegetables – fruits and vegetables  
 herbs, spices – herbs and spices  
 honey – honey and royal jelly  
 meat – meat and meat products (other than poultry)  
 milk – milk and milk products  
 nuts, seeds – nuts, nut products and seeds  
 other food product – other food product / mixed  
 poultry meat – poultry meat and poultry meat products  
 prepared dishes – prepared dishes and snacks

customs seals – placed under customs seals  
 product consumed – product already consumed  
 recall – recall from consumers  
 recall/withdrawal – product recall or withdrawal  
 re-dispatch/destruction – re-dispatch or destruction  
 withdrawal – withdrawal from the market  
 withdrawal f. recipient – withdrawal from recipient(s)

**FIGURE S33** Similarities between product category and action taken within notifications on pesticide residues.

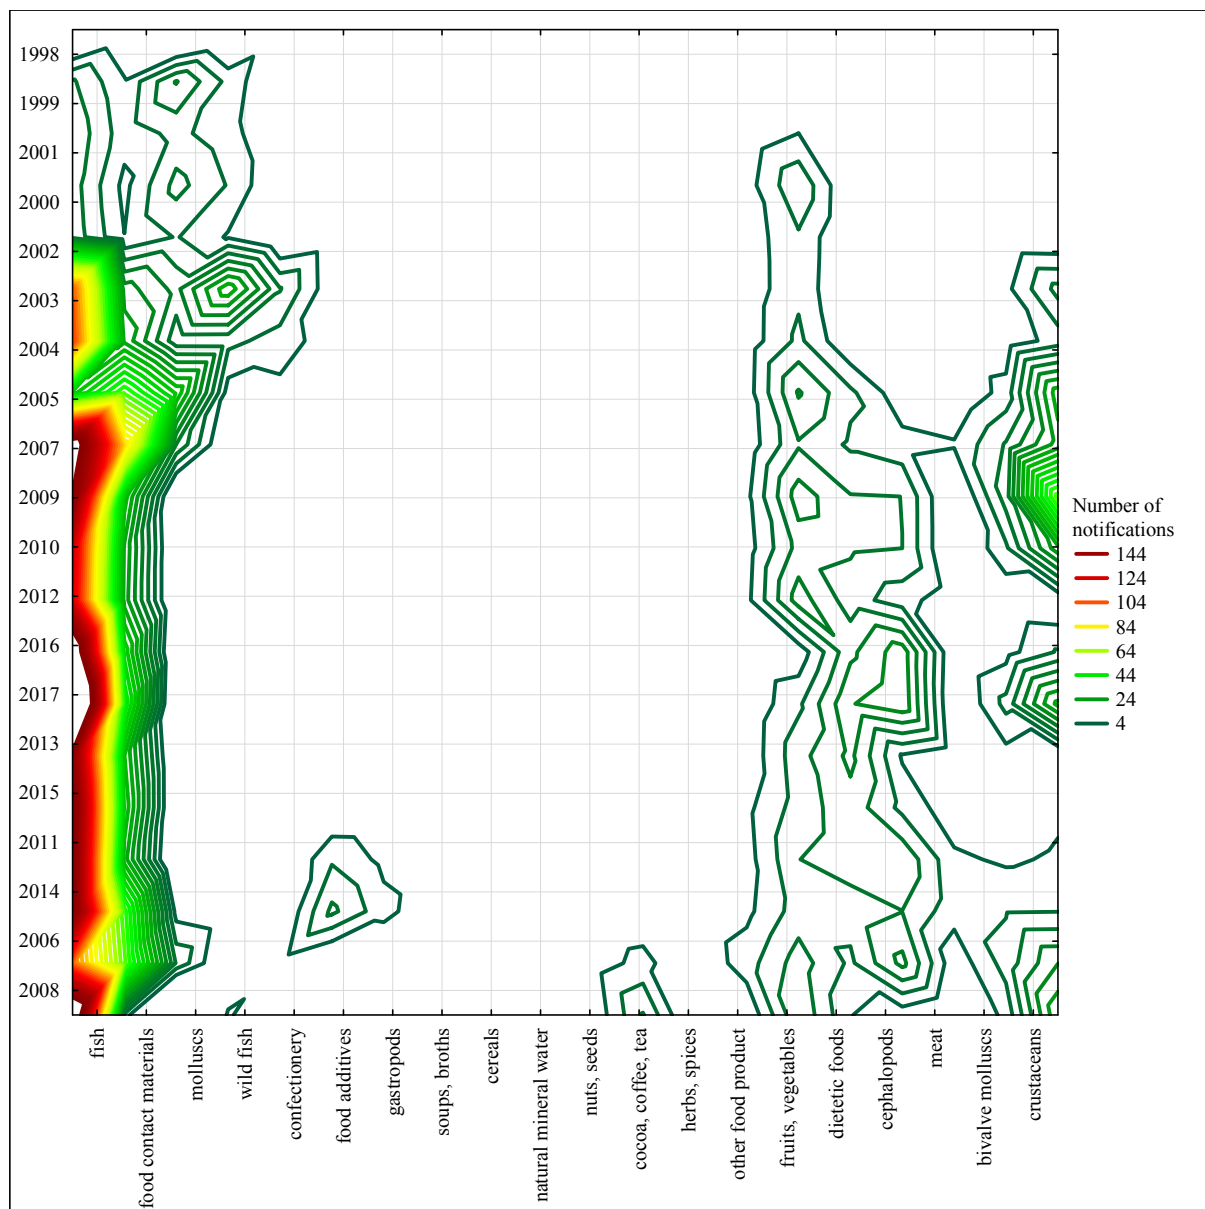

bivalve molluscs – bivalve molluscs and products thereof  
 cephalopods – cephalopods and products thereof  
 cereals – cereals and bakery products  
 cocoa, coffee, tea – cocoa and cocoa preparations, coffee and tea  
 crustaceans – crustaceans and products thereof  
 dietetic foods – dietetic foods, food supplements, fortified foods  
 fish – fish and fish products  
 food additives – food additives and flavourings  
 fruits, vegetables – fruits and vegetables  
 herbs, spices – herbs and spices  
 meat – meat and meat products (other than poultry)  
 molluscs – molluscs and products thereof - (obsolete)  
 nuts, seeds – nuts, nut products and seeds  
 other food product – other food product / mixed  
 soups, broths – soups, broths, sauces and condiments  
 wild fish – wild caught fish and products thereof (other than crustaceans and molluscs) - (obsolete)

**FIGURE S34** Similarities between product category and year within notifications on heavy metals.

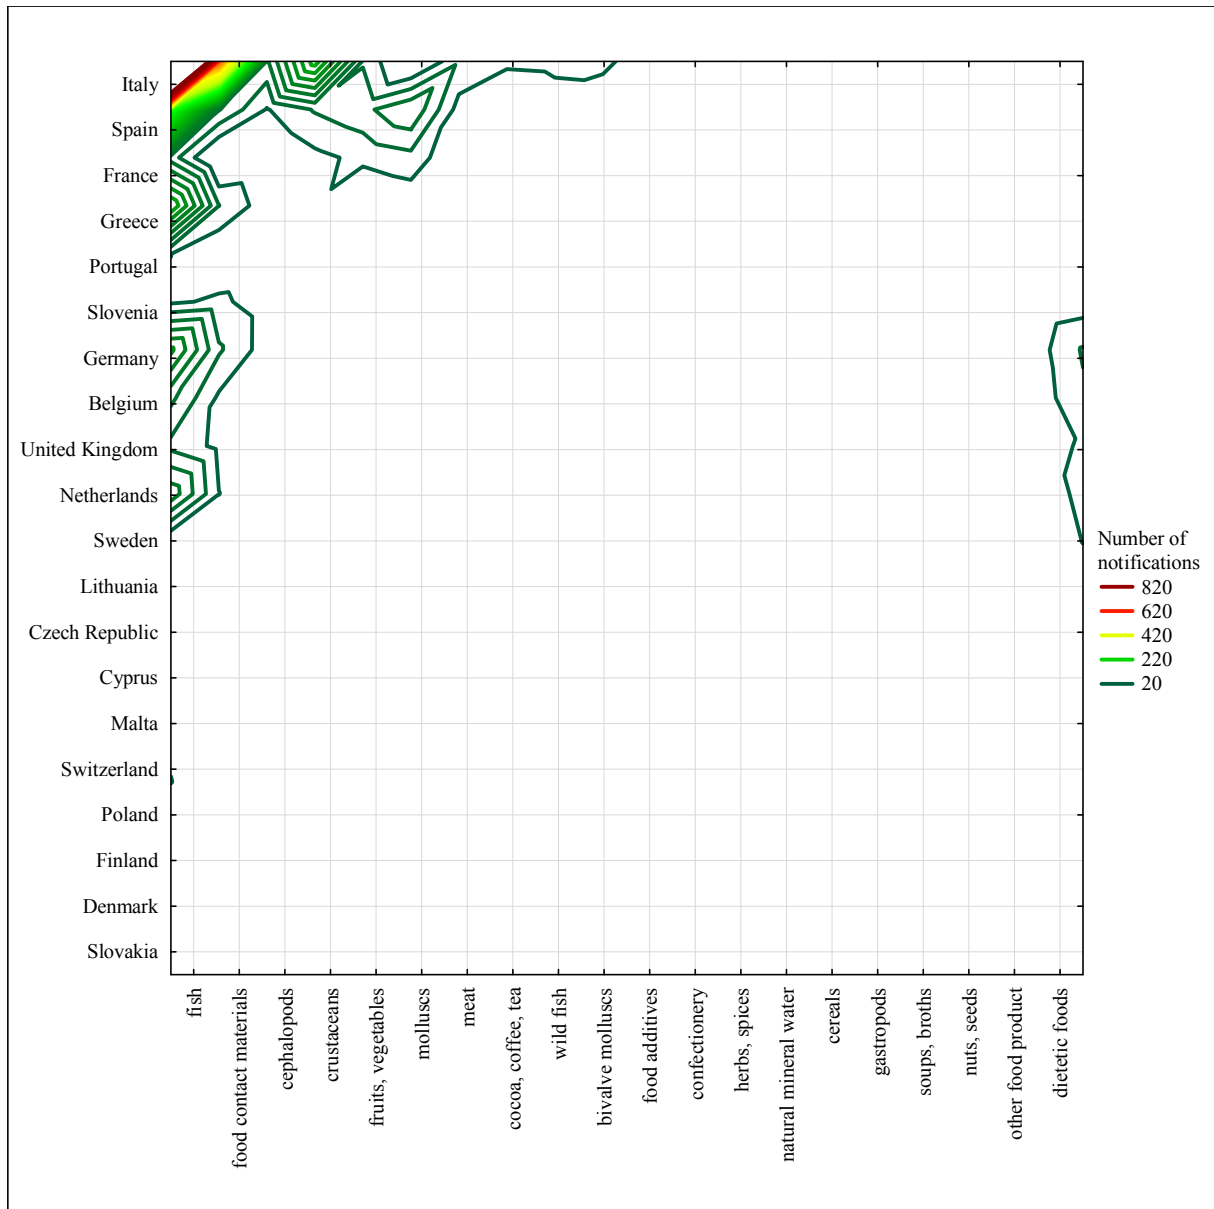

bivalve molluscs – bivalve molluscs and products thereof

cephalopods – cephalopods and products thereof

cereals – cereals and bakery products

cocoa, coffee, tea – cocoa and cocoa preparations, coffee and tea

crustaceans – crustaceans and products thereof

dietetic foods – dietetic foods, food supplements, fortified foods

fish – fish and fish products

food additives – food additives and flavourings

fruits, vegetables – fruits and vegetables

herbs, spices – herbs and spices

meat – meat and meat products (other than poultry)

molluscs – molluscs and products thereof - (obsolete)

nuts, seeds – nuts, nut products and seeds

other food product – other food product / mixed

soups, broths – soups, broths, sauces and condiments

wild fish – wild caught fish and products thereof (other than crustaceans and molluscs) - (obsolete)

**FIGURE S35** Similarities between product category and notifying country within notifications on heavy metals.

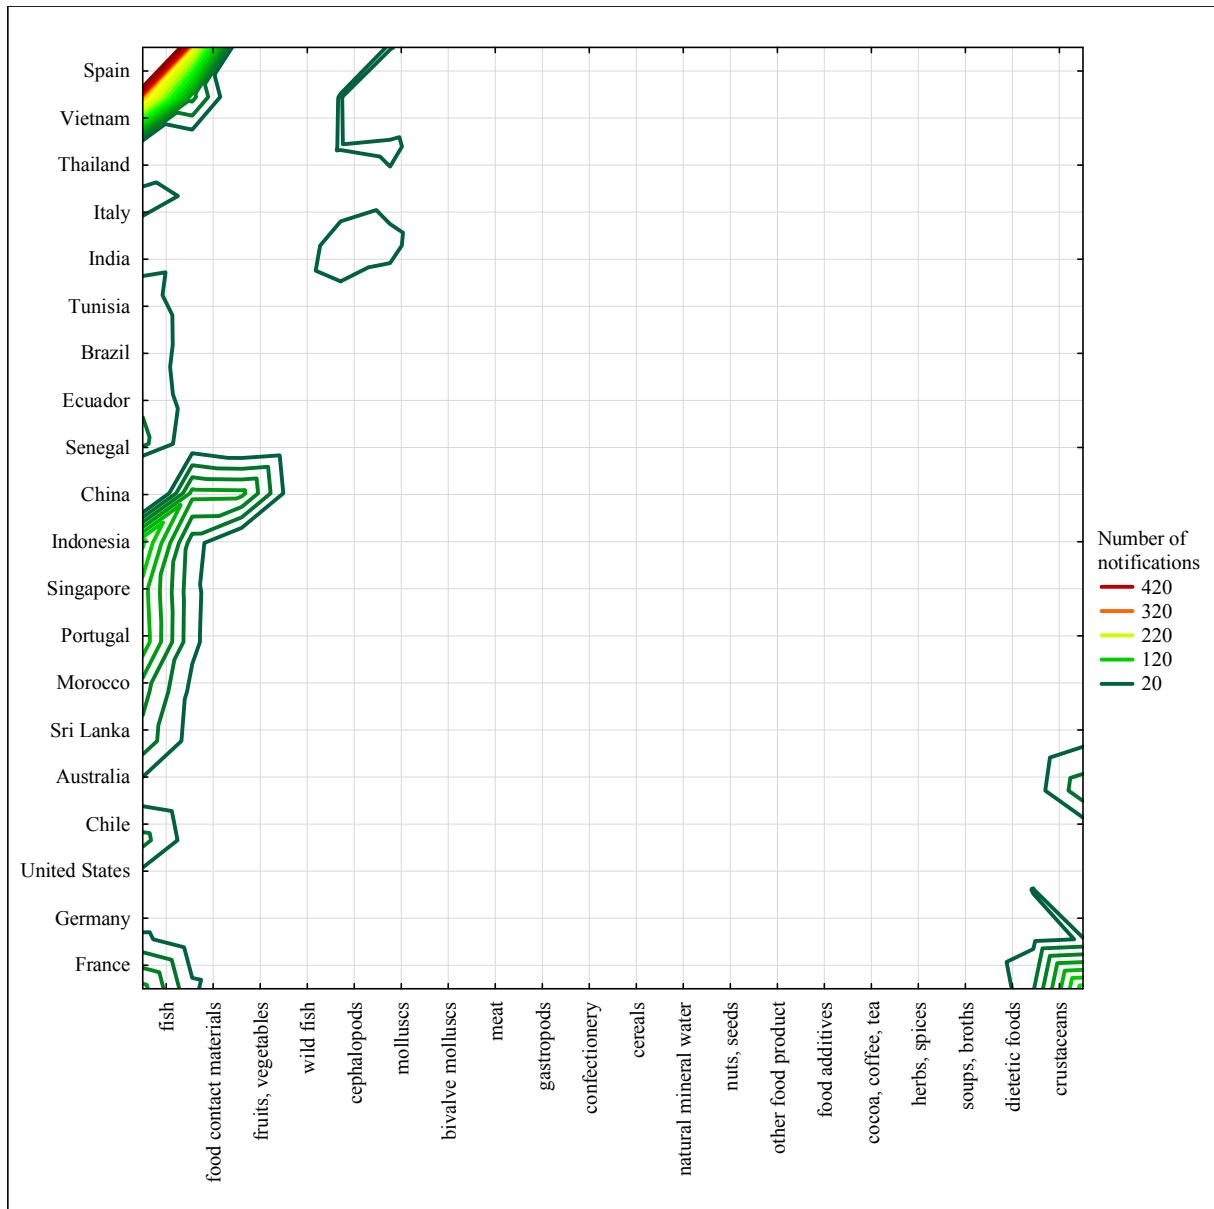

bivalve molluscs – bivalve molluscs and products thereof

cephalopods – cephalopods and products thereof

cereals – cereals and bakery products

cocoa, coffee, tea – cocoa and cocoa preparations, coffee and tea

crustaceans – crustaceans and products thereof

dietetic foods – dietetic foods, food supplements, fortified foods

fish – fish and fish products

food additives – food additives and flavourings

fruits, vegetables – fruits and vegetables

herbs, spices – herbs and spices

meat – meat and meat products (other than poultry)

molluscs – molluscs and products thereof - (obsolete)

nuts, seeds – nuts, nut products and seeds

other food product – other food product / mixed

soups, broths – soups, broths, sauces and condiments

wild fish – wild caught fish and products thereof (other than crustaceans and molluscs) - (obsolete)

**FIGURE S36** Similarities between product category and origin country within notifications on heavy metals.

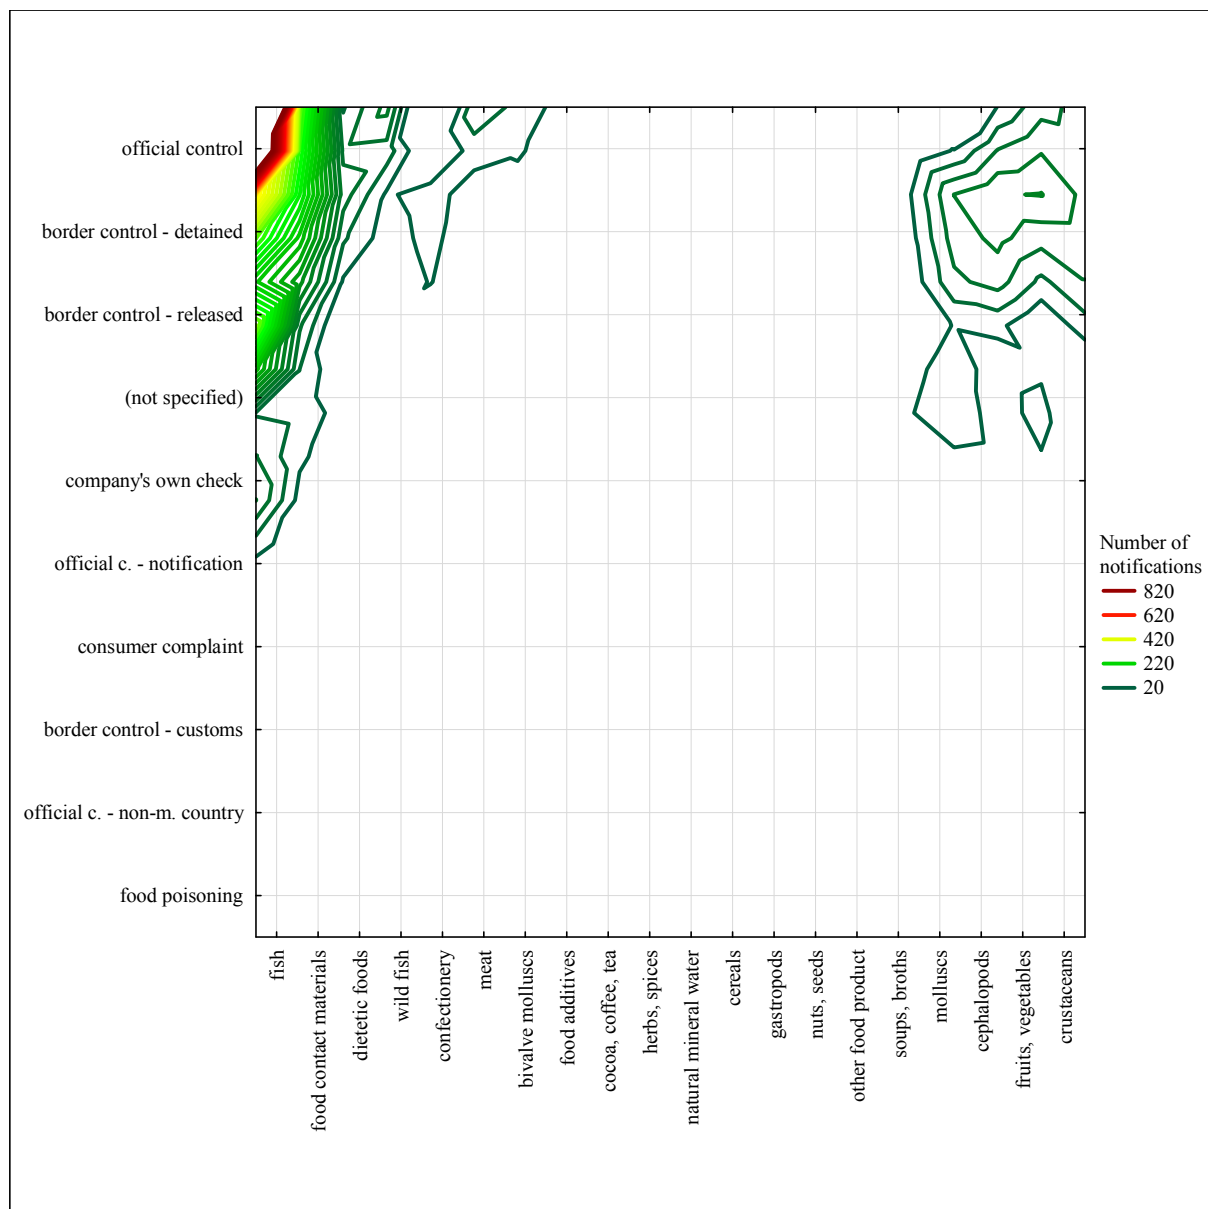

bivalve molluscs – bivalve molluscs and products thereof  
 cephalopods – cephalopods and products thereof  
 cereals – cereals and bakery products  
 cocoa, coffee, tea – cocoa and cocoa preparations, coffee and tea  
 crustaceans – crustaceans and products thereof  
 dietetic foods – dietetic foods, food supplements, fortified foods  
 fish – fish and fish products  
 food additives – food additives and flavourings  
 fruits, vegetables – fruits and vegetables  
 herbs, spices – herbs and spices  
 meat – meat and meat products (other than poultry)  
 molluscs – molluscs and products thereof - (obsolete)  
 nuts, seeds – nuts, nut products and seeds  
 other food product – other food product / mixed  
 soups, broths – soups, broths, sauces and condiments  
 wild fish – wild caught fish and products thereof (other than crustaceans and molluscs) - (obsolete)

border control - customs – border control - consignment under customs  
 border control - detained – border control - consignment detained  
 border control - released – border control - consignment released  
 official c. - notification – official control following RASFF notification  
 official c. – non-m. country – official control in non-member country  
 official control – official control on the market

**FIGURE S37** Similarities between product category and notification basis within notifications on heavy metals.

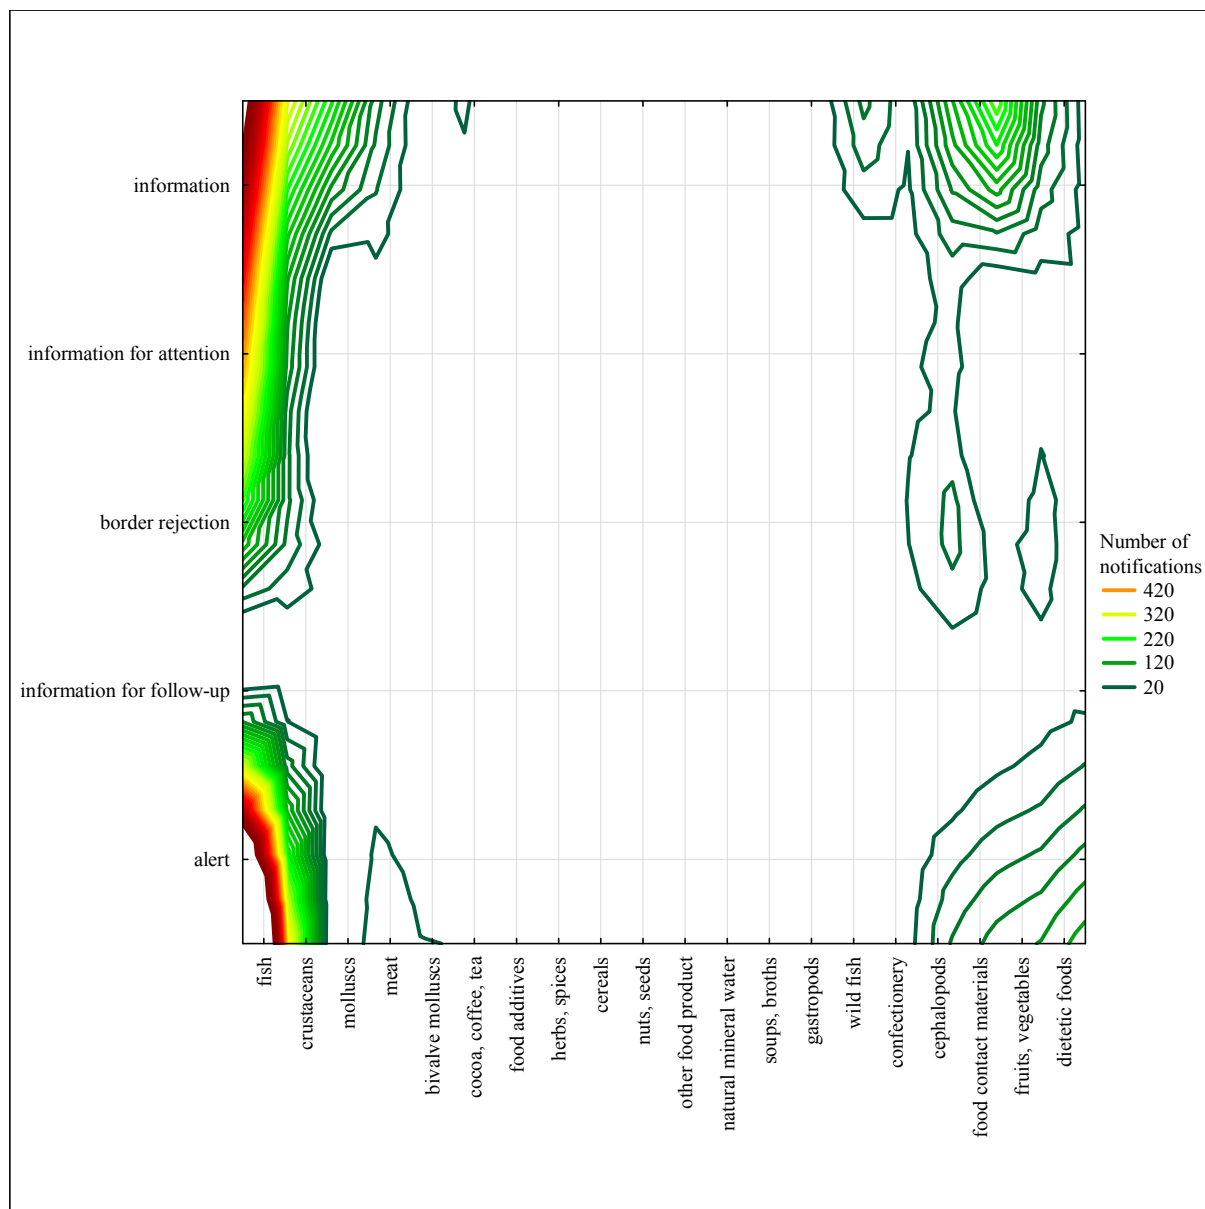

bivalve molluscs – bivalve molluscs and products thereof  
 cephalopods – cephalopods and products thereof  
 cereals – cereals and bakery products  
 cocoa, coffee, tea – cocoa and cocoa preparations, coffee and tea  
 crustaceans – crustaceans and products thereof  
 dietetic foods – dietetic foods, food supplements, fortified foods  
 fish – fish and fish products  
 food additives – food additives and flavourings  
 fruits, vegetables – fruits and vegetables  
 herbs, spices – herbs and spices  
 meat – meat and meat products (other than poultry)  
 molluscs – molluscs and products thereof - (obsolete)  
 nuts, seeds – nuts, nut products and seeds  
 other food product – other food product / mixed  
 soups, broths – soups, broths, sauces and condiments  
 wild fish – wild caught fish and products thereof (other than crustaceans and molluscs) - (obsolete)

**FIGURE S38** Similarities between product category and notification type within notifications on heavy metals.

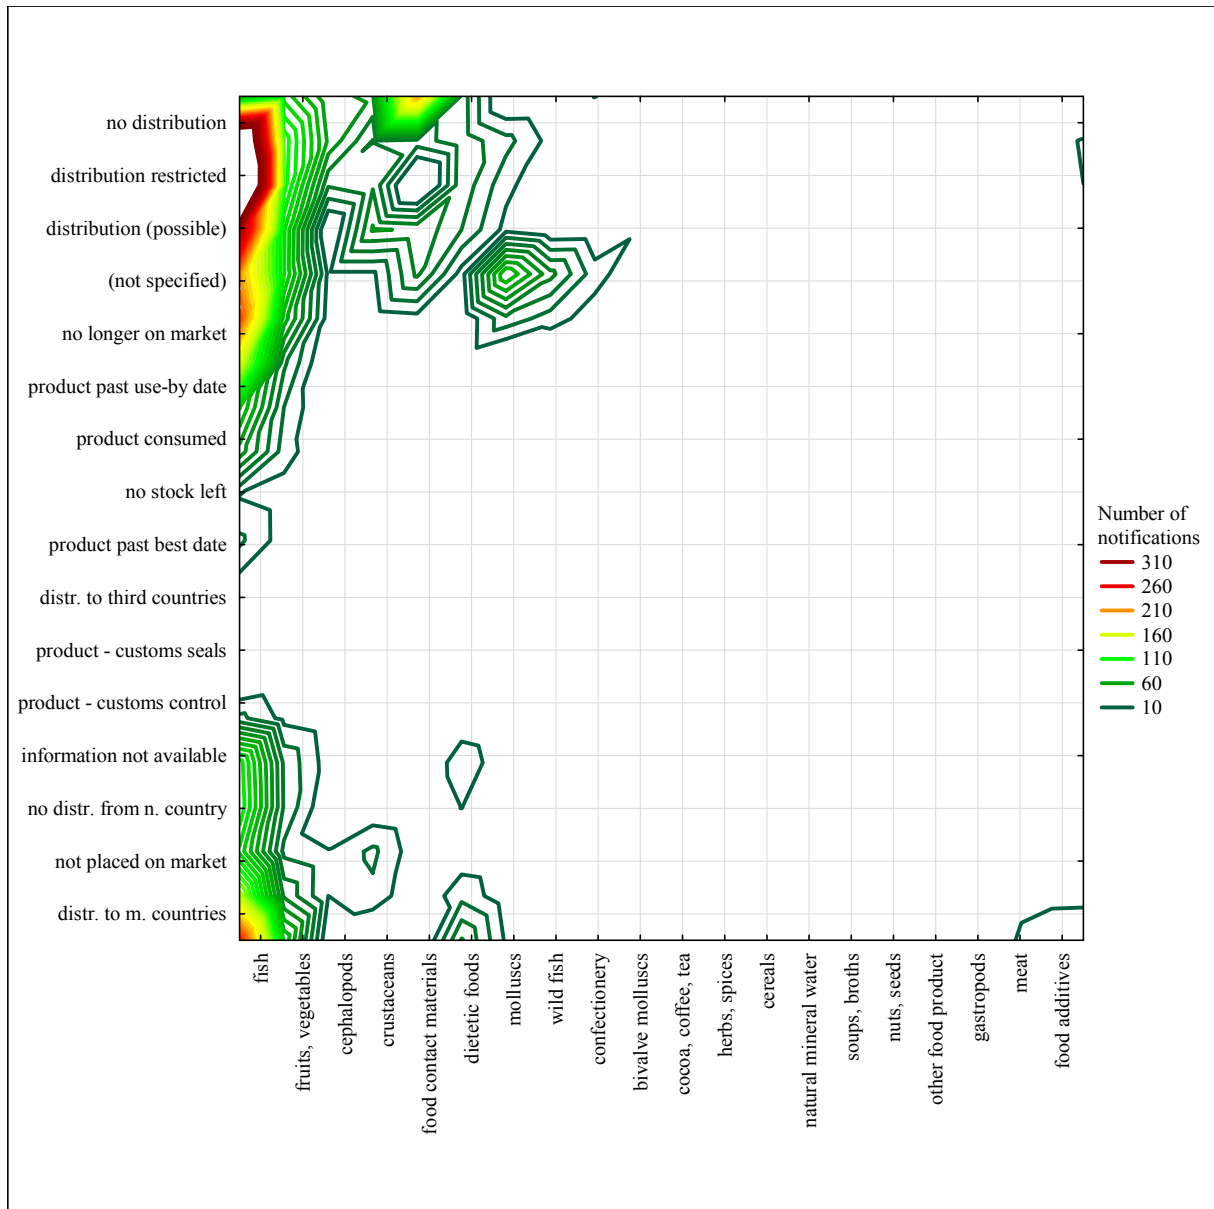

bivalve molluscs – bivalve molluscs and products thereof  
 cephalopods – cephalopods and products thereof  
 cereals – cereals and bakery products  
 cocoa, coffee, tea – cocoa and cocoa preparations, coffee and tea  
 crustaceans – crustaceans and products thereof  
 dietetic foods – dietetic foods, food supplements, fortified foods  
 fish – fish and fish products  
 food additives – food additives and flavourings  
 fruits, vegetables – fruits and vegetables  
 herbs, spices – herbs and spices  
 meat – meat and meat products (other than poultry)  
 molluscs – molluscs and products thereof - (obsolete)  
 nuts, seeds – nuts, nut products and seeds  
 other food product – other food product / mixed  
 soups, broths – soups, broths, sauces and condiments  
 wild fish – wild caught fish and products thereof (other than crustaceans and molluscs) - (obsolete)

distr. to m. countries – distribution to other member countries  
 distr. to third countries – distribution to third countries  
 distribution (possible) – distribution on the market (possible)  
 distribution restricted – distribution restricted to notifying country  
 information not available – information on distribution not (yet) available  
 no distr. from n. country – no distribution from notifying country  
 no longer on market – product (presumably) no longer on the market  
 not placed on market – product not (yet) placed on the market  
 product - customs control – product under customs control  
 product - customs seals – product allowed to travel to destination under customs seals  
 product consumed – product already consumed  
 product past best date – product past best before date

**FIGURE S39** Similarities between product category and distribution status within notifications on heavy metals.

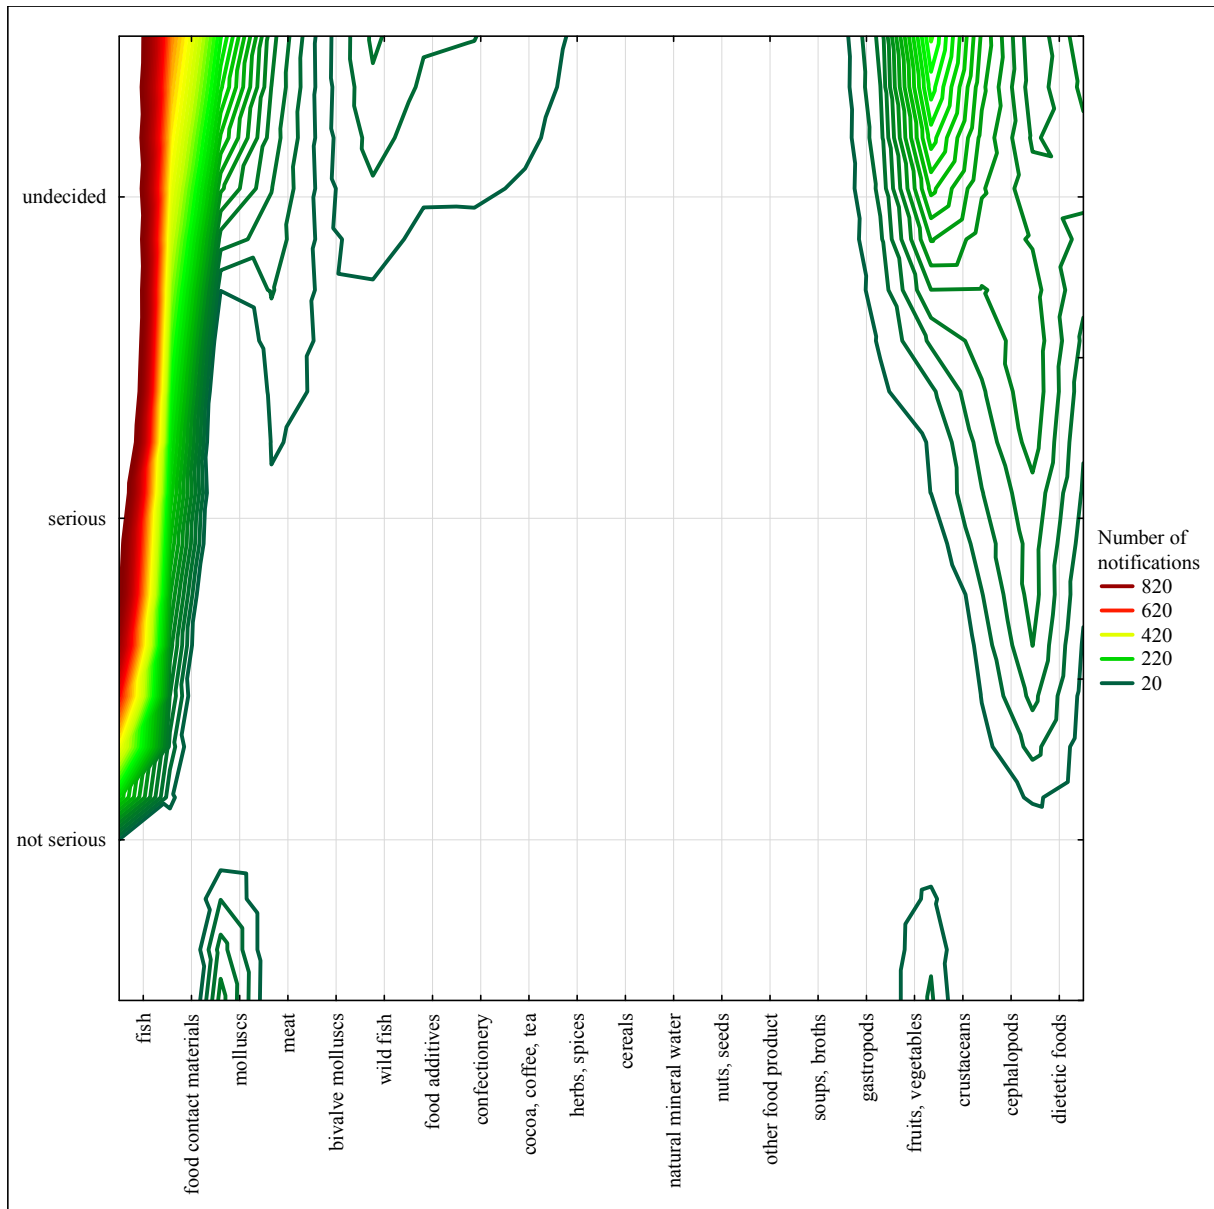

bivalve molluscs – bivalve molluscs and products thereof

cephalopods – cephalopods and products thereof

cereals – cereals and bakery products

cocoa, coffee, tea – cocoa and cocoa preparations, coffee and tea

crustaceans – crustaceans and products thereof

dietetic foods – dietetic foods, food supplements, fortified foods

fish – fish and fish products

food additives – food additives and flavourings

fruits, vegetables – fruits and vegetables

herbs, spices – herbs and spices

meat – meat and meat products (other than poultry)

molluscs – molluscs and products thereof - (obsolete)

nuts, seeds – nuts, nut products and seeds

other food product – other food product / mixed

soups, broths – soups, broths, sauces and condiments

wild fish – wild caught fish and products thereof (other than crustaceans and molluscs) - (obsolete)

**FIGURE S40** Similarities between product category and risk decision within notifications on heavy metals.



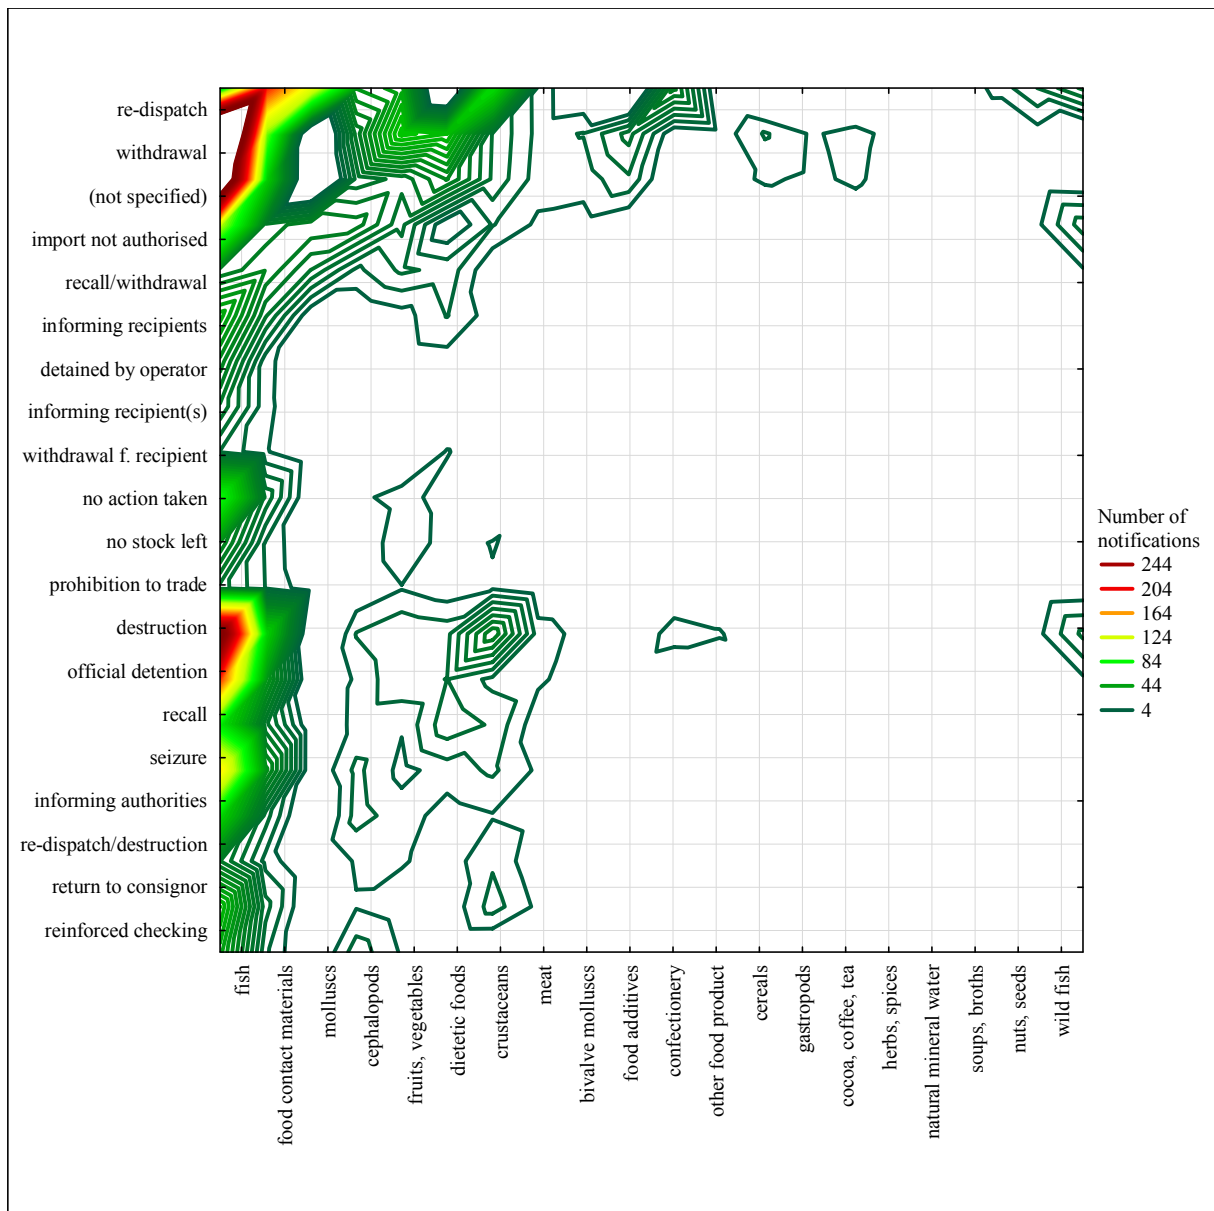

bivalve molluscs – bivalve molluscs and products thereof  
 cephalopods – cephalopods and products thereof  
 cereals – cereals and bakery products  
 cocoa, coffee, tea – cocoa and cocoa preparations, coffee and tea  
 crustaceans – crustaceans and products thereof  
 dietetic foods – dietetic foods, food supplements, fortified foods  
 fish – fish and fish products  
 food additives – food additives and flavourings  
 fruits, vegetables – fruits and vegetables  
 herbs, spices – herbs and spices  
 meat – meat and meat products (other than poultry)  
 molluscs – molluscs and products thereof - (obsolete)  
 nuts, seeds – nuts, nut products and seeds  
 other food product – other food product / mixed  
 soups, broths – soups, broths, sauces and condiments  
 wild fish – wild caught fish and products thereof (other than crustaceans and molluscs) - (obsolete)

prohibition to trade – prohibition to trade - sales ban  
 recall – recall from consumers  
 recall/withdrawal – product recall or withdrawal  
 re-dispatch/destruction – re-dispatch or destruction  
 withdrawal – withdrawal from the market  
 withdrawal f. recipient – withdrawal from recipient(s)

**FIGURE S41** Similarities between product category and action taken within notifications on heavy metals.

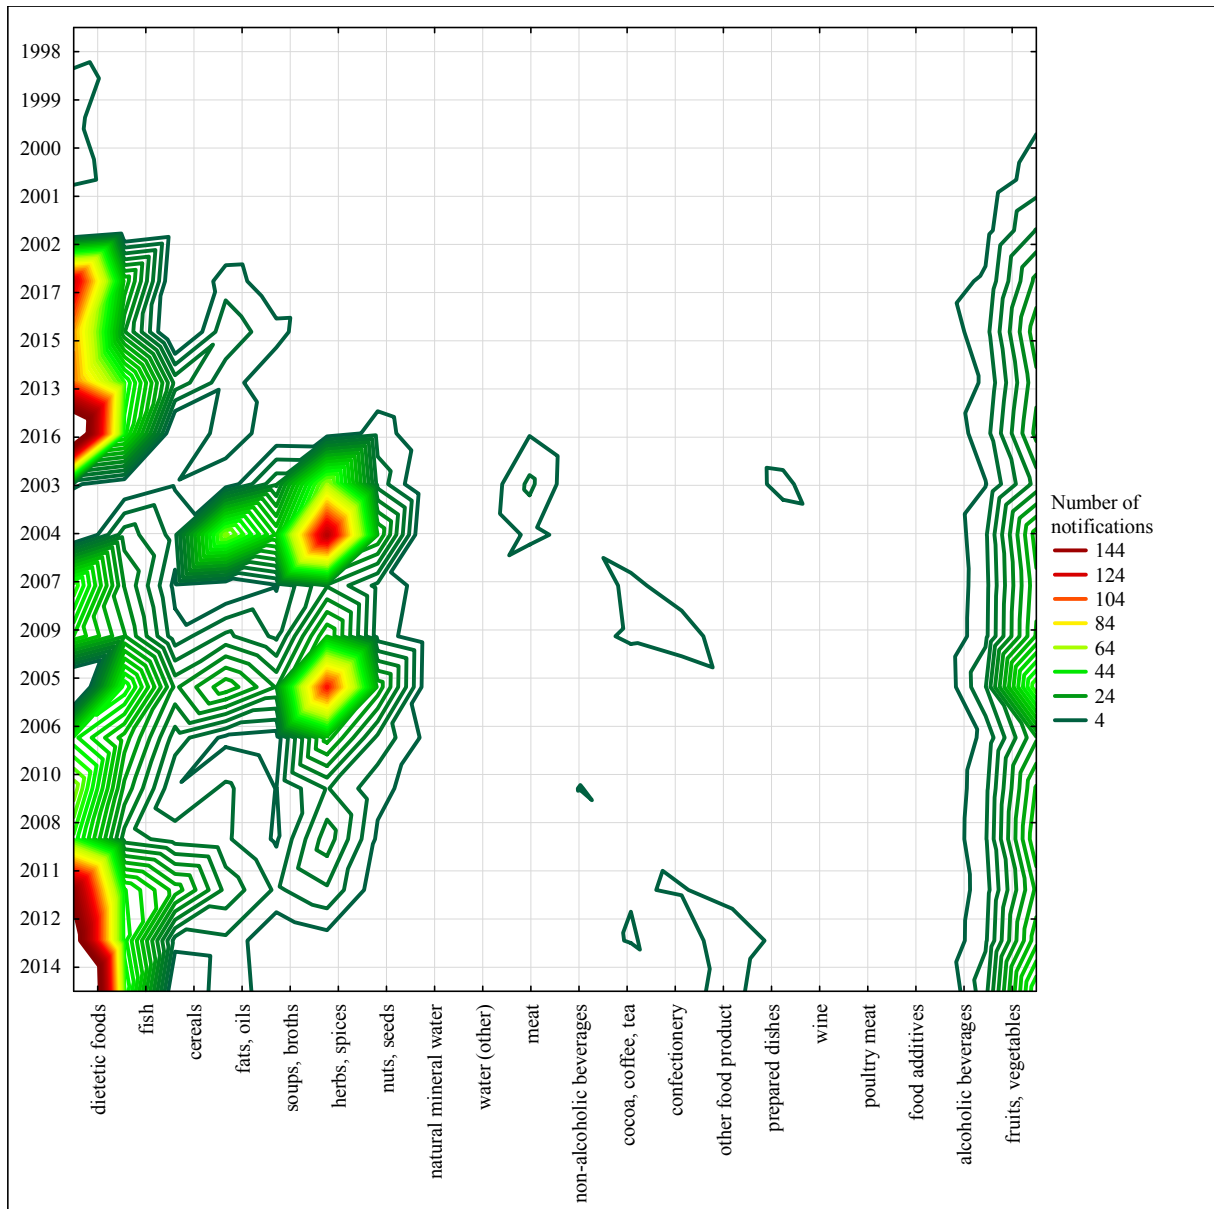

cereals – cereals and bakery products  
 cocoa, coffee, tea – cocoa and cocoa preparations, coffee and tea  
 dietetic foods – dietetic foods, food supplements, fortified foods  
 fats, oils – fats and oils  
 fish – fish and fish products  
 food additives – food additives and flavourings  
 fruits, vegetables – fruits and vegetables  
 herbs, spices – herbs and spices  
 meat – meat and meat products (other than poultry)  
 nuts, seeds – nuts, nut products and seeds  
 other food product – other food product / mixed  
 poultry meat – poultry meat and poultry meat products  
 prepared dishes – prepared dishes and snacks  
 soups, broths – soups, broths, sauces and condiments  
 water (other) – water for human consumption (other)

**FIGURE S42** Similarities between product category and year within notifications on composition.

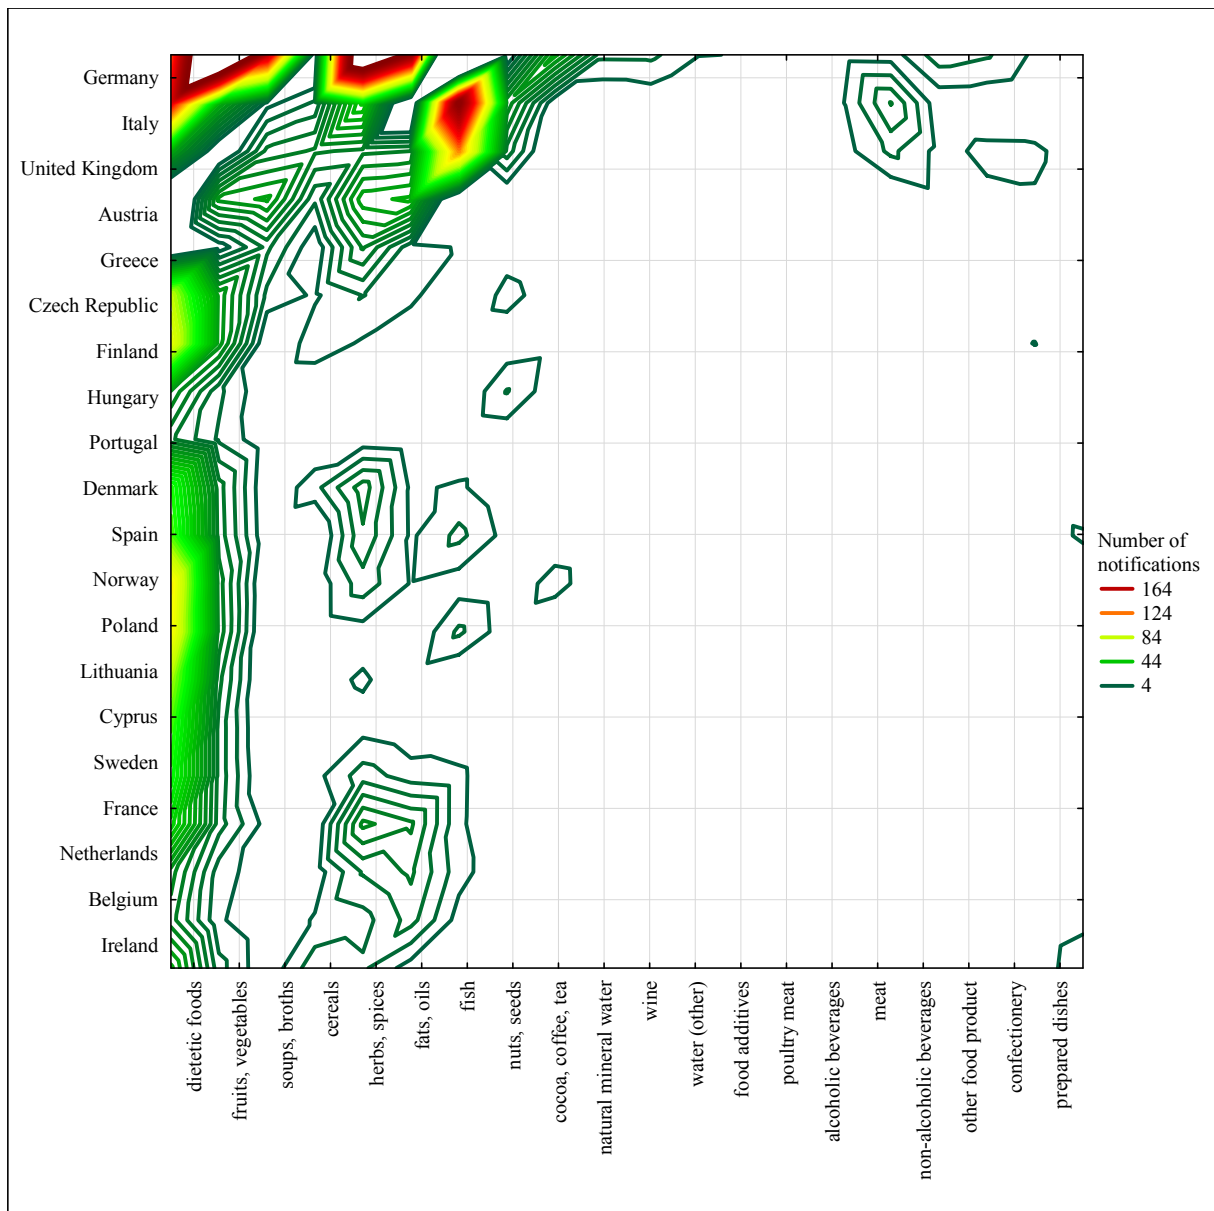

cereals – cereals and bakery products  
 cocoa, coffee, tea – cocoa and cocoa preparations, coffee and tea  
 dietetic foods – dietetic foods, food supplements, fortified foods  
 fats, oils – fats and oils  
 fish – fish and fish products  
 food additives – food additives and flavourings  
 fruits, vegetables – fruits and vegetables  
 herbs, spices – herbs and spices  
 meat – meat and meat products (other than poultry)  
 nuts, seeds – nuts, nut products and seeds  
 other food product – other food product / mixed  
 poultry meat – poultry meat and poultry meat products  
 prepared dishes – prepared dishes and snacks  
 soups, broths – soups, broths, sauces and condiments  
 water (other) – water for human consumption (other)

**FIGURE S43** Similarities between product category and notifying country within notifications on composition.

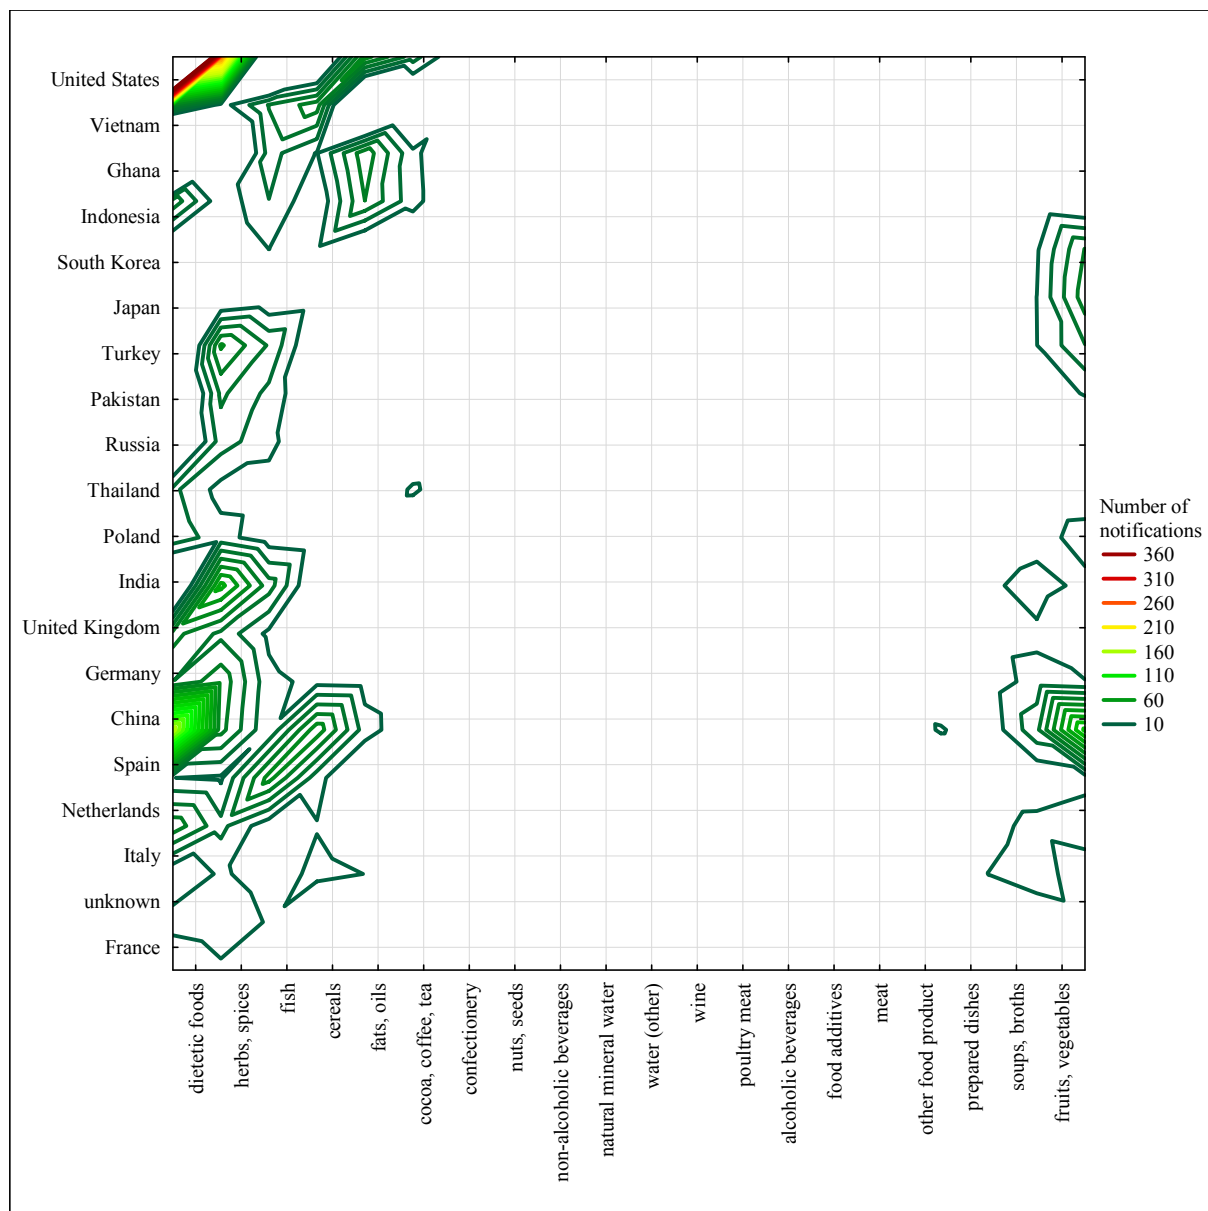

cereals – cereals and bakery products  
 cocoa, coffee, tea – cocoa and cocoa preparations, coffee and tea  
 dietetic foods – dietetic foods, food supplements, fortified foods  
 fats, oils – fats and oils  
 fish – fish and fish products  
 food additives – food additives and flavourings  
 fruits, vegetables – fruits and vegetables  
 herbs, spices – herbs and spices  
 meat – meat and meat products (other than poultry)  
 nuts, seeds – nuts, nut products and seeds  
 other food product – other food product / mixed  
 poultry meat – poultry meat and poultry meat products  
 prepared dishes – prepared dishes and snacks  
 soups, broths – soups, broths, sauces and condiments  
 water (other) – water for human consumption (other)

**FIGURE S44** Similarities between product category and origin country within notifications on composition.

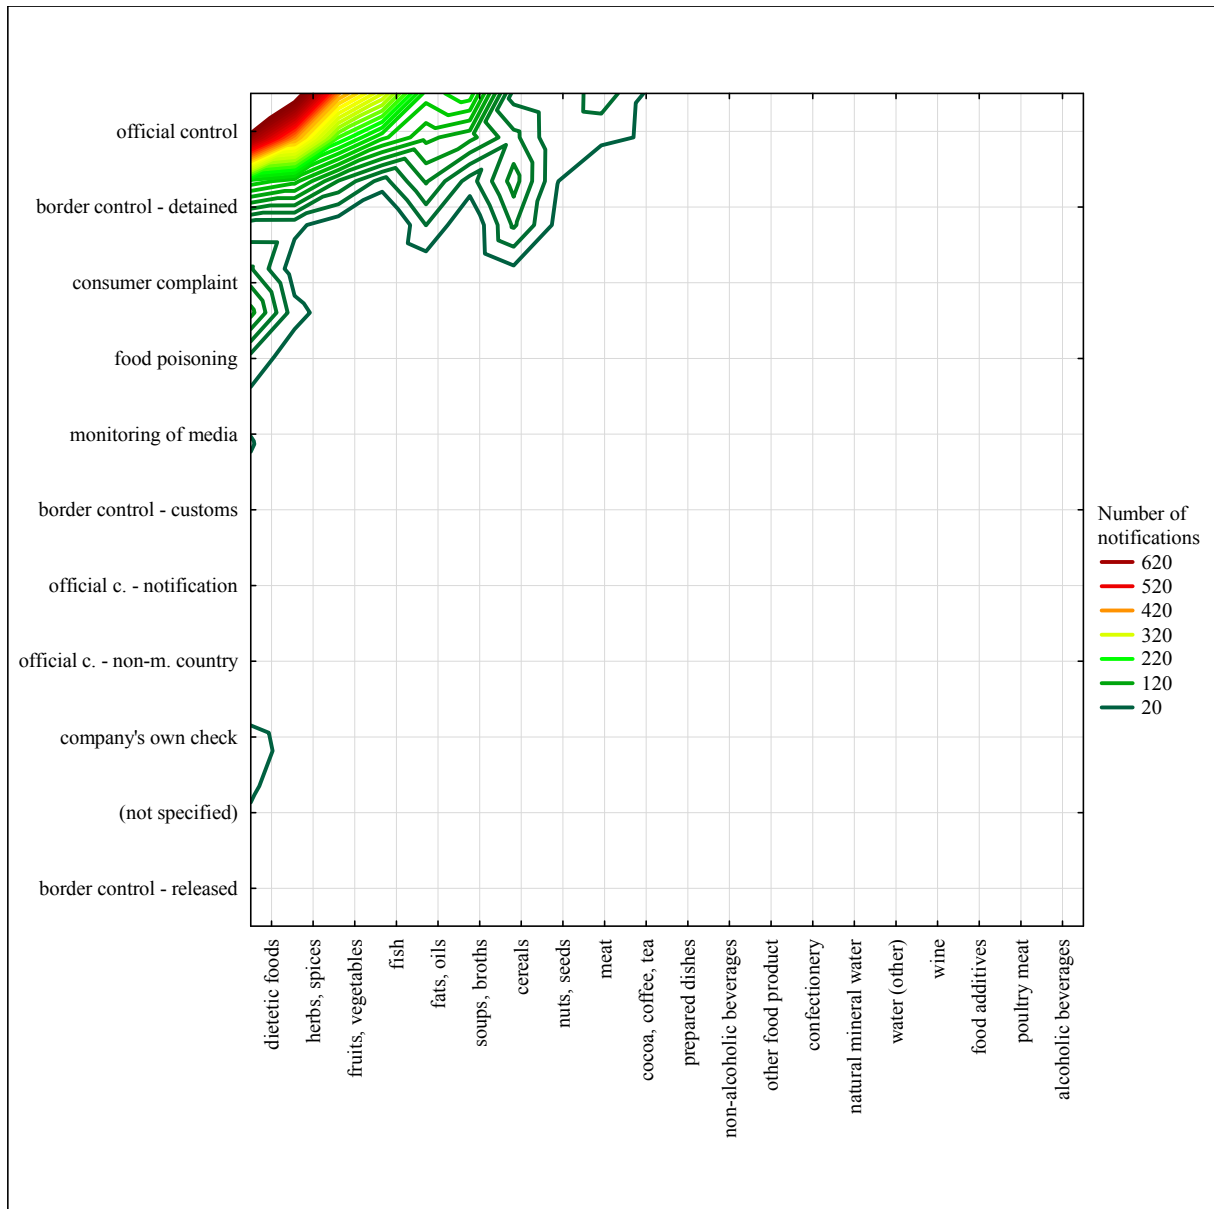

cereals – cereals and bakery products  
 cocoa, coffee, tea – cocoa and cocoa preparations, coffee and tea  
 dietetic foods – dietetic foods, food supplements, fortified foods  
 fats, oils – fats and oils  
 fish – fish and fish products  
 food additives – food additives and flavourings  
 fruits, vegetables – fruits and vegetables  
 herbs, spices – herbs and spices  
 meat – meat and meat products (other than poultry)  
 nuts, seeds – nuts, nut products and seeds  
 other food product – other food product / mixed  
 poultry meat – poultry meat and poultry meat products  
 prepared dishes – prepared dishes and snacks  
 soups, broths – soups, broths, sauces and condiments  
 water (other) – water for human consumption (other)

border control - customs – border control - consignment under customs  
 border control - detained – border control - consignment detained  
 border control - released – border control - consignment released  
 official c. - non-m. country – official control in non-member country  
 official c. - notification – official control following RASFF notification  
 official control – official control on the market

**FIGURE S45** Similarities between product category and notification basis within notifications on composition.

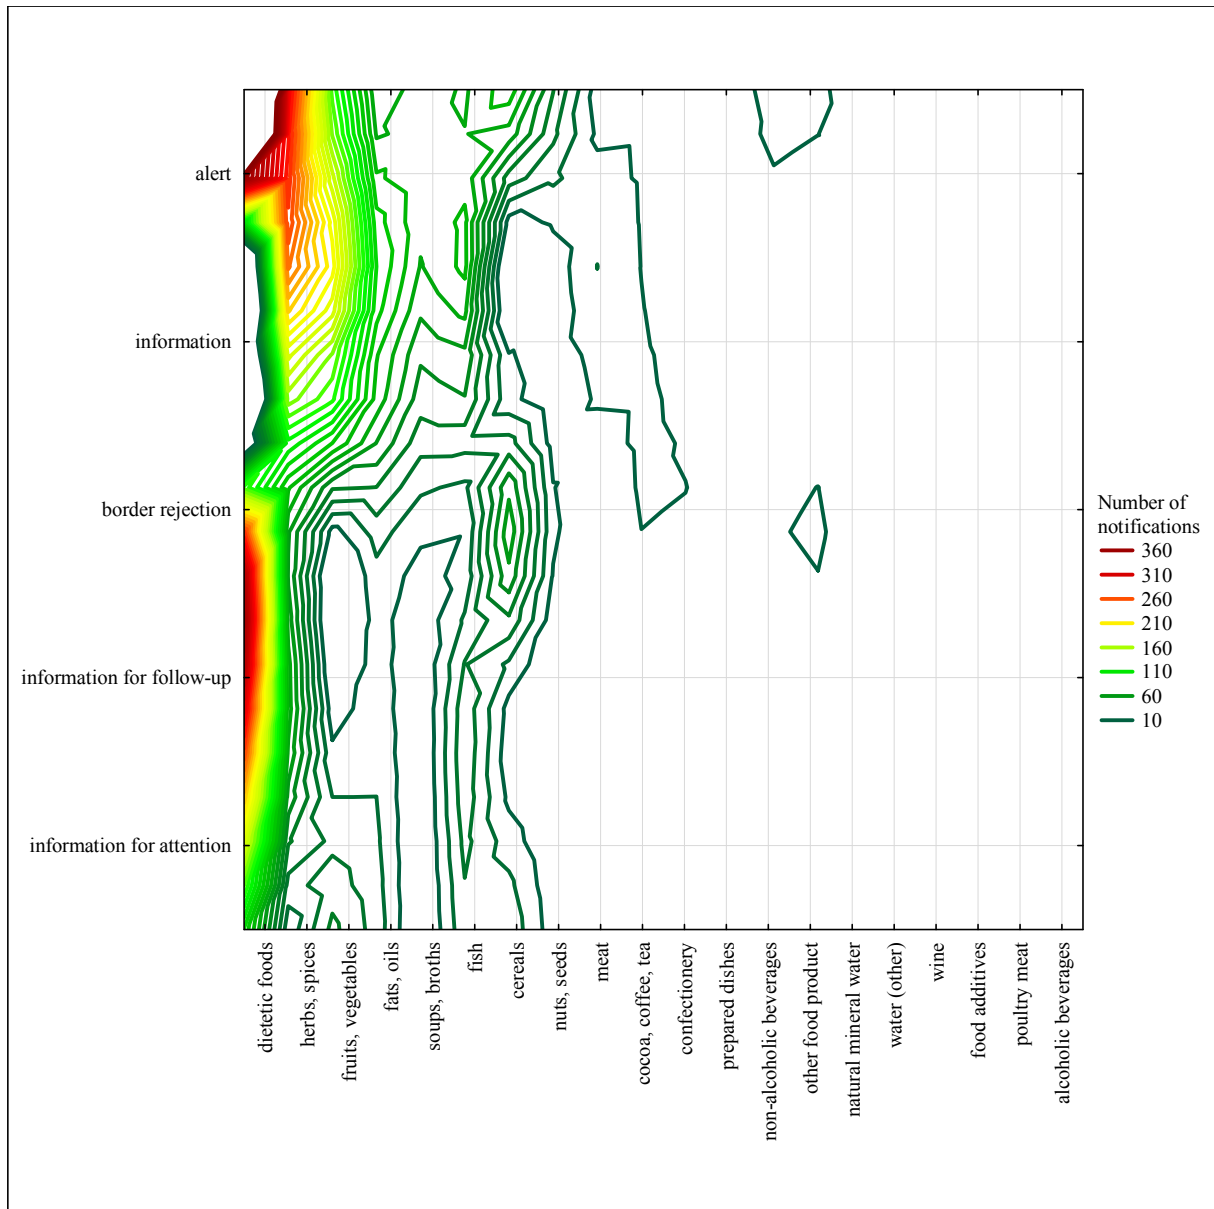

cereals – cereals and bakery products  
 cocoa, coffee, tea – cocoa and cocoa preparations, coffee and tea  
 dietetic foods – dietetic foods, food supplements, fortified foods  
 fats, oils – fats and oils  
 fish – fish and fish products  
 food additives – food additives and flavourings  
 fruits, vegetables – fruits and vegetables  
 herbs, spices – herbs and spices  
 meat – meat and meat products (other than poultry)  
 nuts, seeds – nuts, nut products and seeds  
 other food product – other food product / mixed  
 poultry meat – poultry meat and poultry meat products  
 prepared dishes – prepared dishes and snacks  
 soups, broths – soups, broths, sauces and condiments  
 water (other) – water for human consumption (other)

**FIGURE S46** Similarities between product category and notification type within notifications on composition.

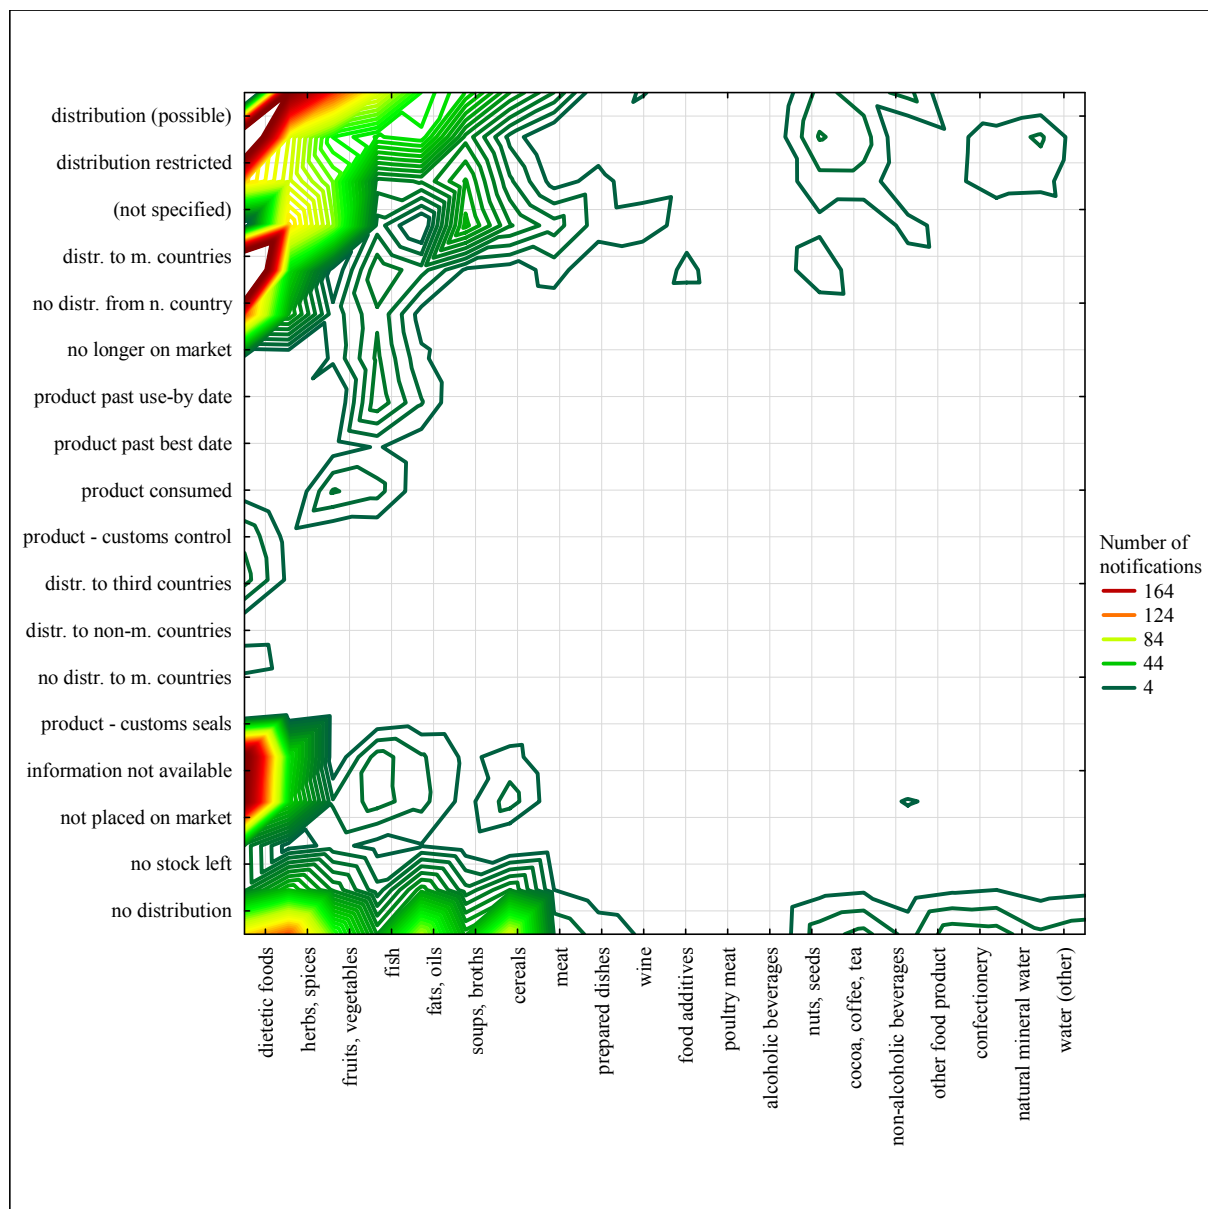

cereals – cereals and bakery products  
 cocoa, coffee, tea – cocoa and cocoa preparations, coffee and tea  
 dietetic foods – dietetic foods, food supplements, fortified foods  
 fats, oils – fats and oils  
 fish – fish and fish products  
 food additives – food additives and flavourings  
 fruits, vegetables – fruits and vegetables  
 herbs, spices – herbs and spices  
 meat – meat and meat products (other than poultry)  
 nuts, seeds – nuts, nut products and seeds  
 other food product – other food product / mixed  
 poultry meat – poultry meat and poultry meat products  
 prepared dishes – prepared dishes and snacks  
 soups, broths – soups, broths, sauces and condiments  
 water (other) – water for human consumption (other)

distr. to m. countries – distribution to other member countries  
 distr. to non-m. countries – distribution to non-member countries

distr. to third countries – distribution to third countries  
 distribution (possible) – distribution on the market (possible)  
 distribution restricted – distribution restricted to notifying country  
 information not available – information on distribution not (yet) available  
 no distr. from n. country – no distribution from notifying country  
 no distr. to m. countries – no distribution to other member countries  
 no longer on market – product (presumably) no longer on the market  
 not placed on market – product not (yet) placed on the market  
 product - customs control – product under customs control  
 product - customs seals – product allowed to travel to destination under customs seals  
 product consumed – product already consumed  
 product past best date – product past best before date

FIGURE S47 Similarities between product category and distribution status within notifications on composition.

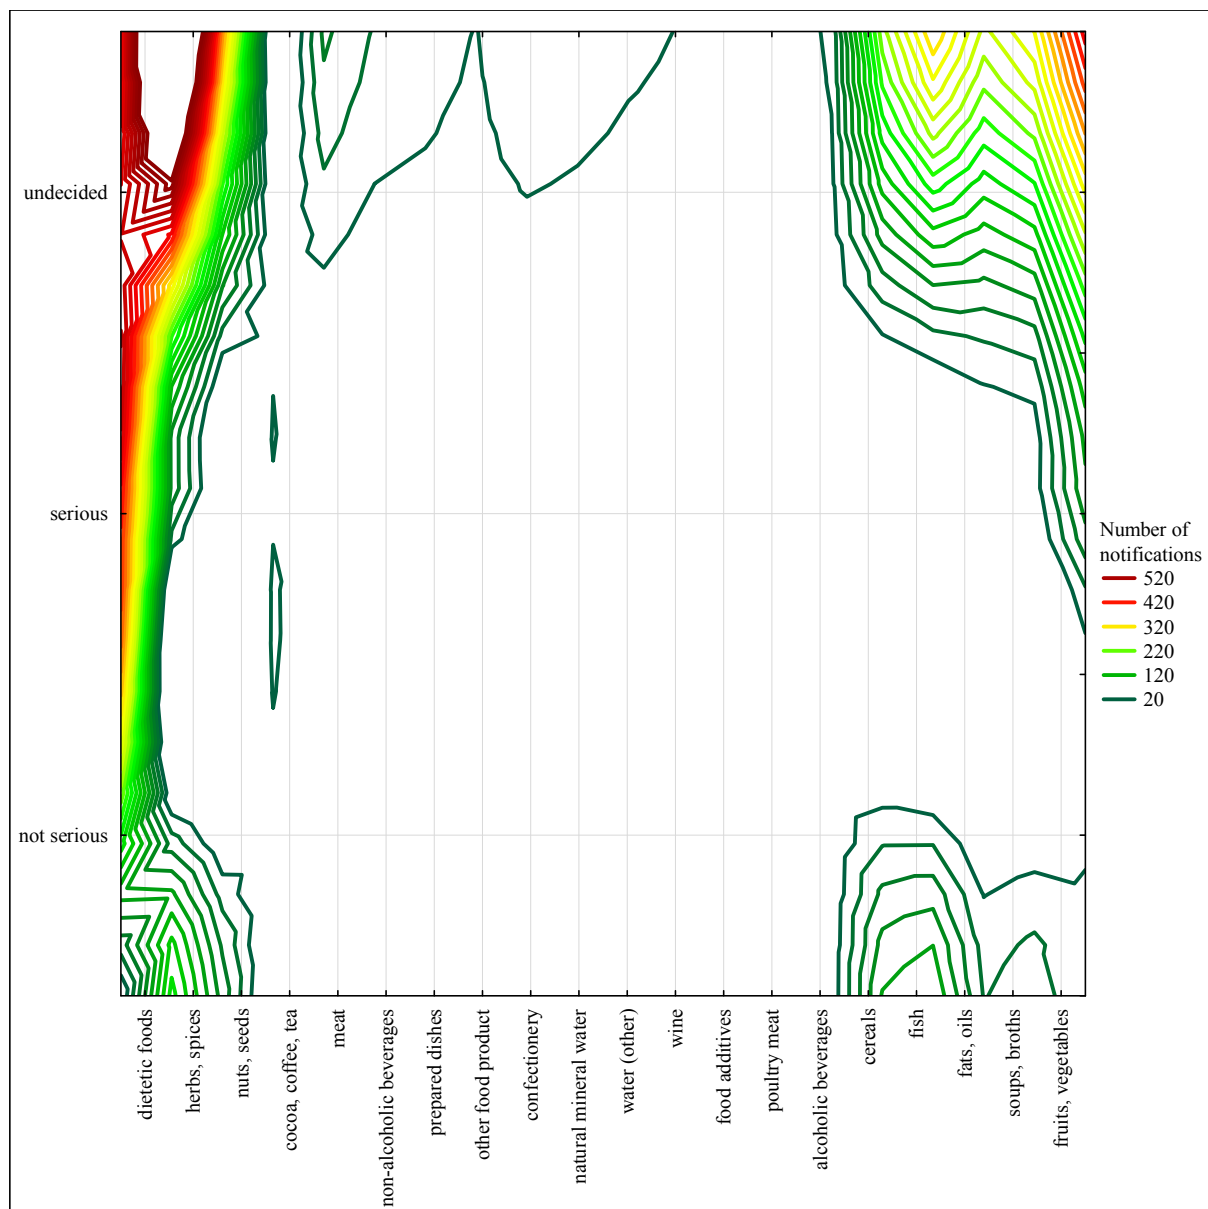

cereals – cereals and bakery products  
 cocoa, coffee, tea – cocoa and cocoa preparations, coffee and tea  
 dietetic foods – dietetic foods, food supplements, fortified foods  
 fats, oils – fats and oils  
 fish – fish and fish products  
 food additives – food additives and flavourings  
 fruits, vegetables – fruits and vegetables  
 herbs, spices – herbs and spices  
 meat – meat and meat products (other than poultry)  
 nuts, seeds – nuts, nut products and seeds  
 other food product – other food product / mixed  
 poultry meat – poultry meat and poultry meat products  
 prepared dishes – prepared dishes and snacks  
 soups, broths – soups, broths, sauces and condiments  
 water (other) – water for human consumption (other)

**FIGURE S48** Similarities between product category and risk decision within notifications on composition.



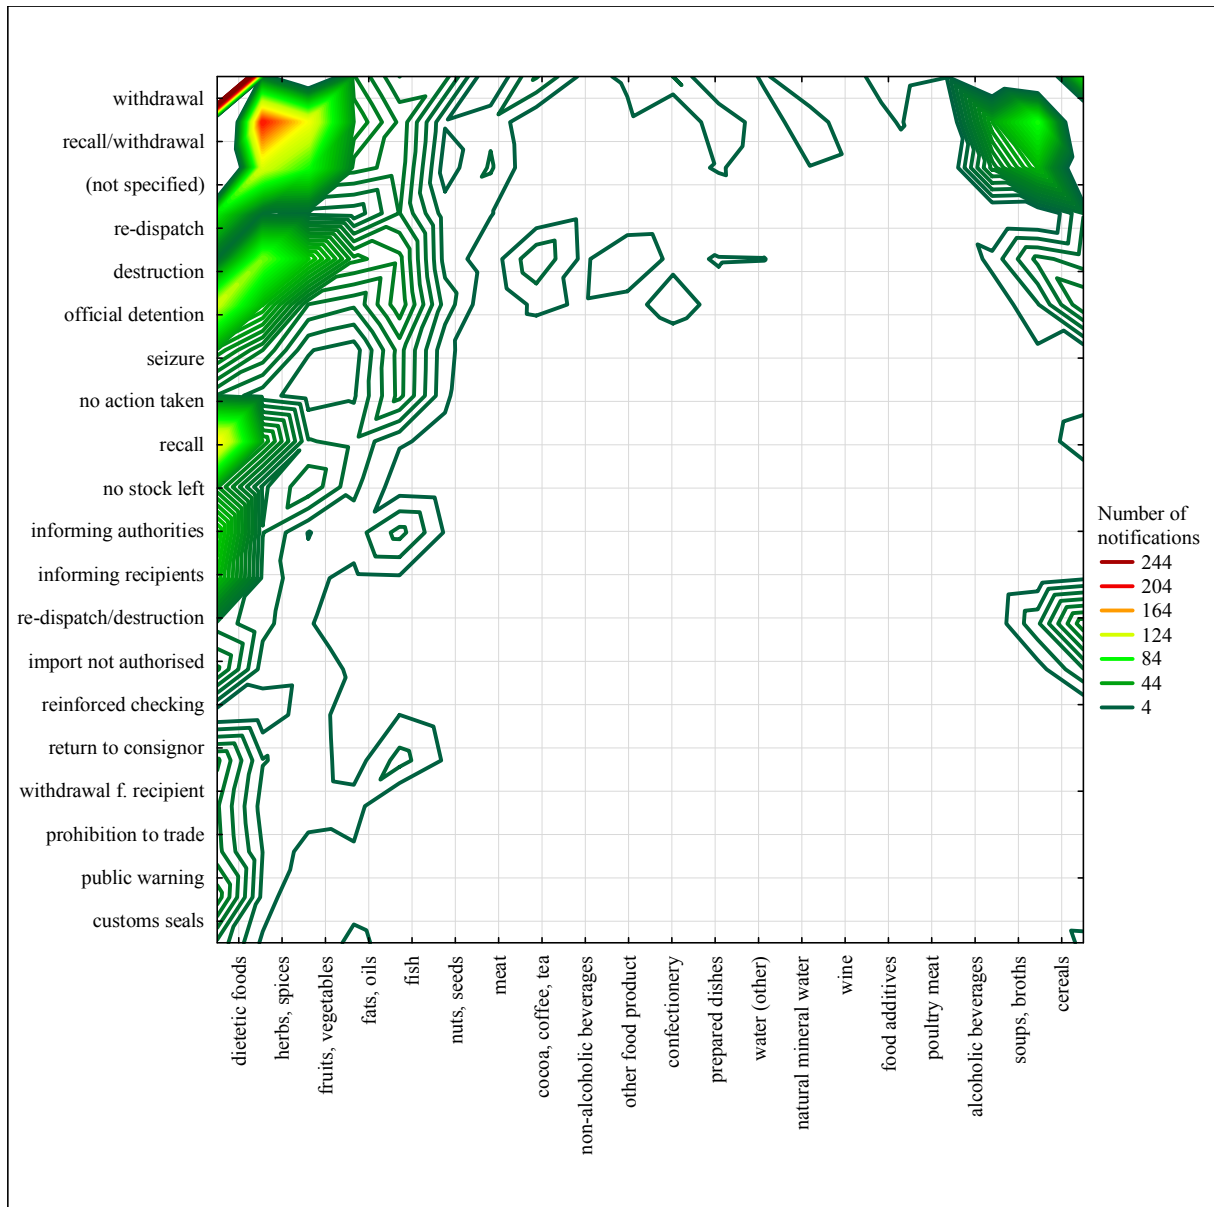

cereals – cereals and bakery products  
 cocoa, coffee, tea – cocoa and cocoa preparations, coffee and tea  
 dietetic foods – dietetic foods, food supplements, fortified foods  
 fats, oils – fats and oils  
 fish – fish and fish products  
 food additives – food additives and flavourings  
 fruits, vegetables – fruits and vegetables  
 herbs, spices – herbs and spices  
 meat – meat and meat products (other than poultry)  
 nuts, seeds – nuts, nut products and seeds  
 other food product – other food product / mixed  
 poultry meat – poultry meat and poultry meat products  
 prepared dishes – prepared dishes and snacks  
 soups, broths – soups, broths, sauces and condiments  
 water (other) – water for human consumption (other)

customs seals – placed under customs seals  
 prohibition to trade – prohibition to trade - sales ban  
 public warning – public warning - press release  
 recall – recall from consumers  
 recall/withdrawal – product recall or withdrawal  
 re-dispatch/destruction – re-dispatch or destruction  
 withdrawal – withdrawal from the market  
 withdrawal f. recipient – withdrawal from recipient(s)

**FIGURE S49** Similarities between product category and action taken within notifications on composition.

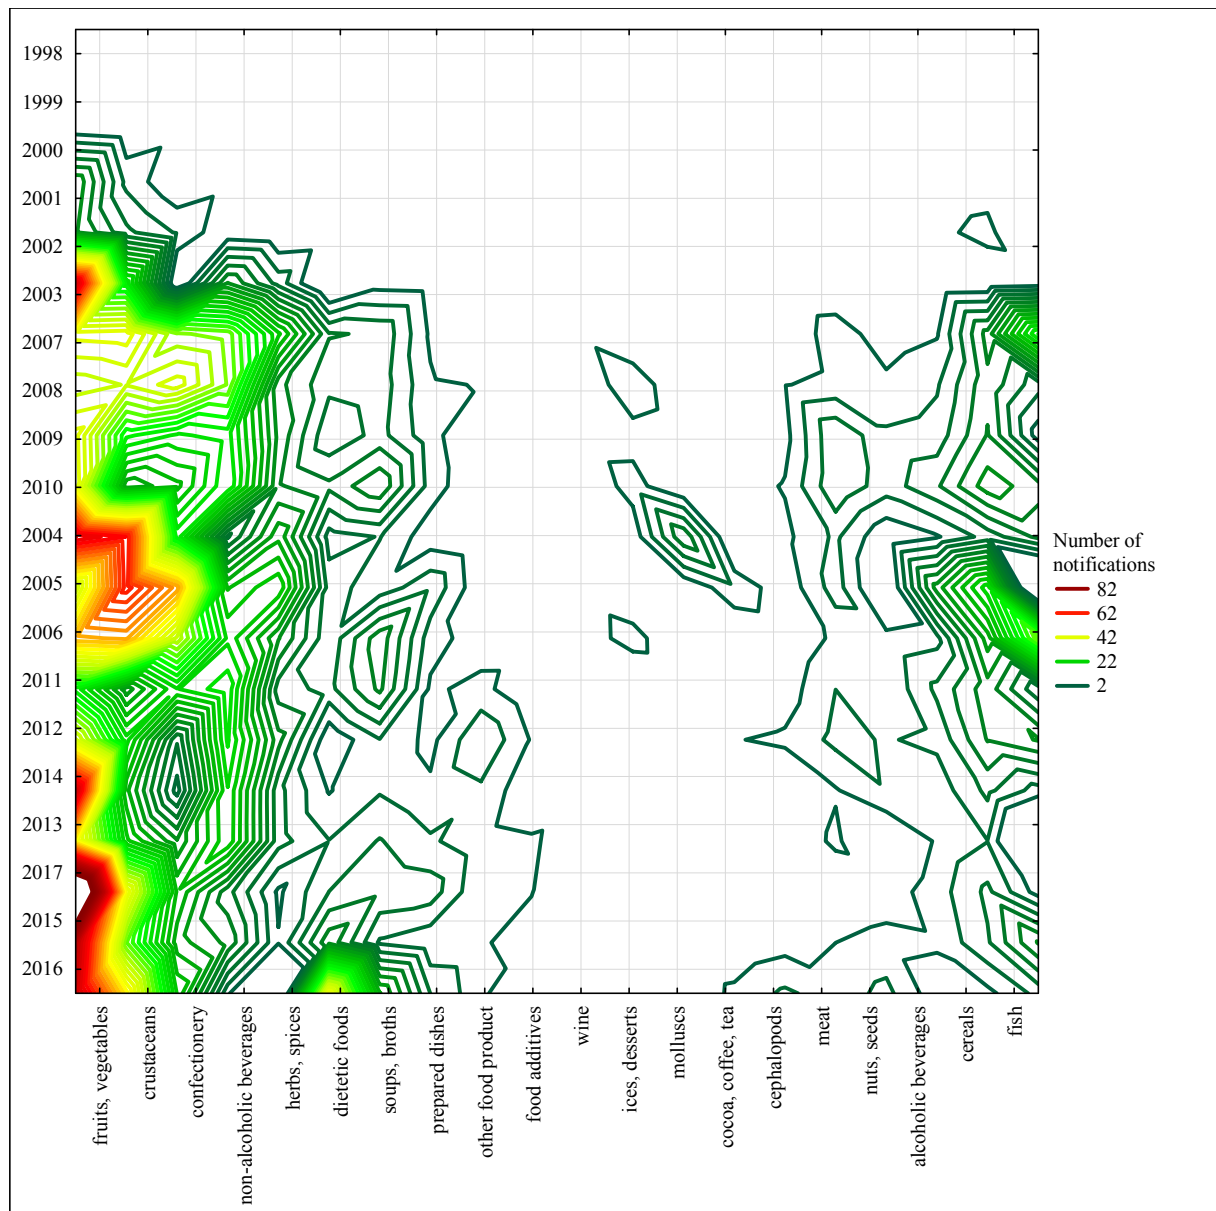

cephalopods – cephalopods and products thereof  
 cereals – cereals and bakery products  
 cocoa, coffee, tea – cocoa and cocoa preparations, coffee and tea  
 crustaceans – crustaceans and products thereof  
 dietetic foods – dietetic foods, food supplements, fortified foods  
 fish – fish and fish products  
 food additives – food additives and flavourings  
 fruits, vegetables – fruits and vegetables  
 herbs, spices – herbs and spices  
 ices, desserts – ices and desserts  
 meat – meat and meat products (other than poultry)  
 molluscs – molluscs and products thereof - (obsolete)  
 nuts, seeds – nuts, nut products and seeds  
 other food product – other food product / mixed  
 prepared dishes – prepared dishes and snacks  
 soups, broths – soups, broths, sauces and condiments

**FIGURE S50** Similarities between product category and year within notifications on food additives and flavourings.

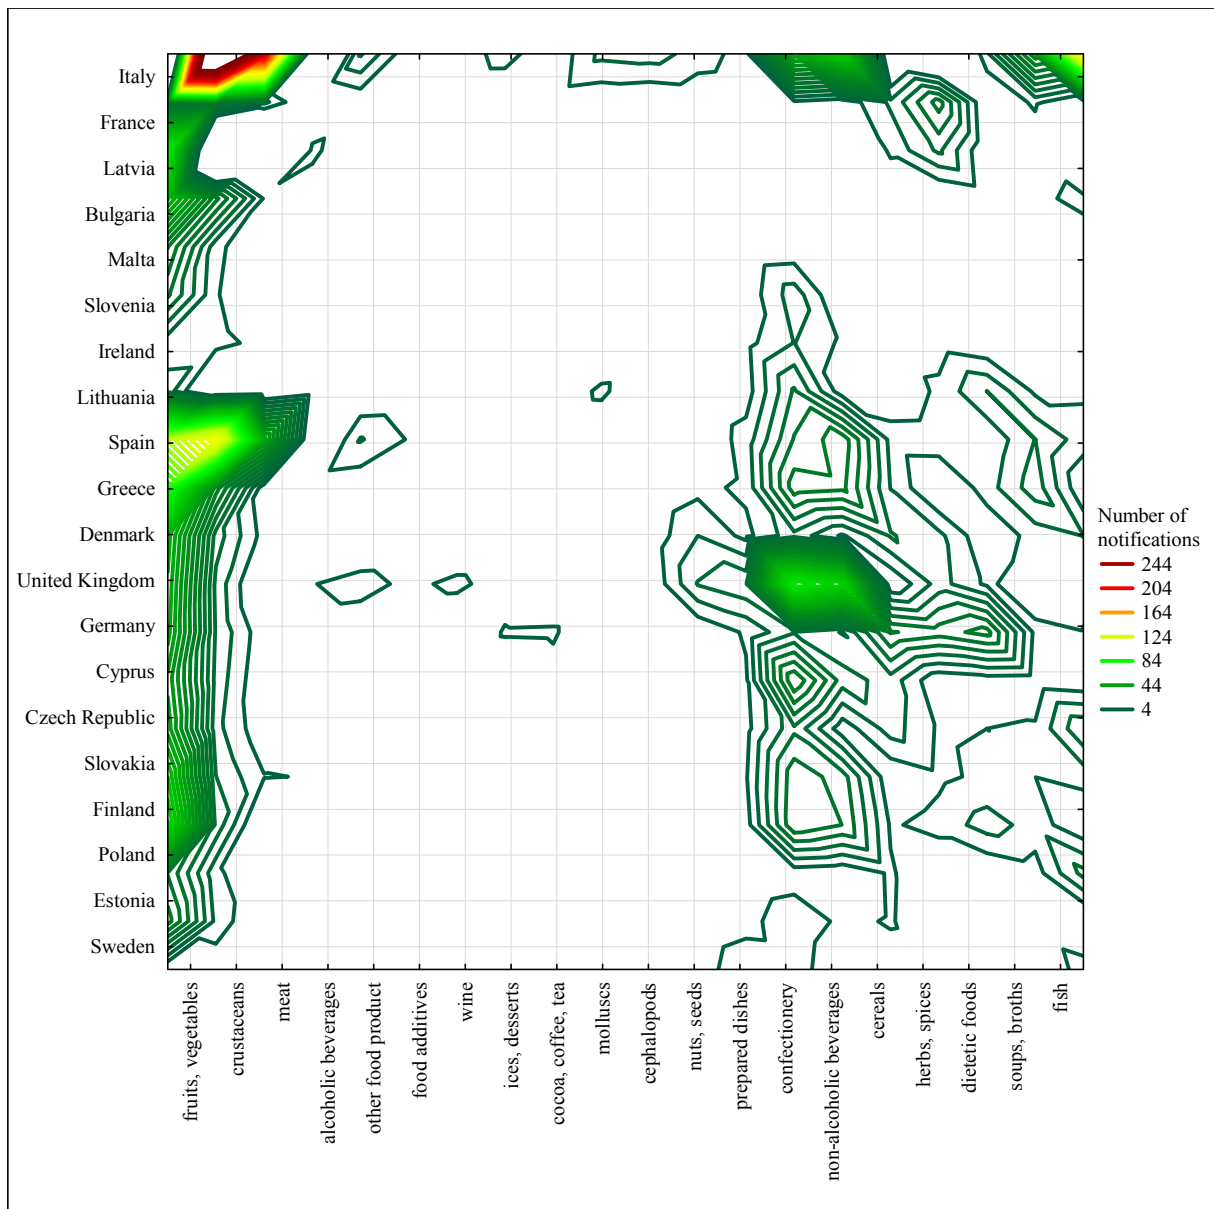

cephalopods – cephalopods and products thereof  
 cereals – cereals and bakery products  
 cocoa, coffee, tea – cocoa and cocoa preparations, coffee and tea  
 crustaceans – crustaceans and products thereof  
 dietetic foods – dietetic foods, food supplements, fortified foods  
 fish – fish and fish products  
 food additives – food additives and flavourings  
 fruits, vegetables – fruits and vegetables  
 herbs, spices – herbs and spices  
 ices, desserts – ices and desserts  
 meat – meat and meat products (other than poultry)  
 molluscs – molluscs and products thereof - (obsolete)  
 nuts, seeds – nuts, nut products and seeds  
 other food product – other food product / mixed  
 prepared dishes – prepared dishes and snacks  
 soups, broths – soups, broths, sauces and condiments

**FIGURE S51** Similarities between product category and notifying country within notifications on food additives and flavourings.

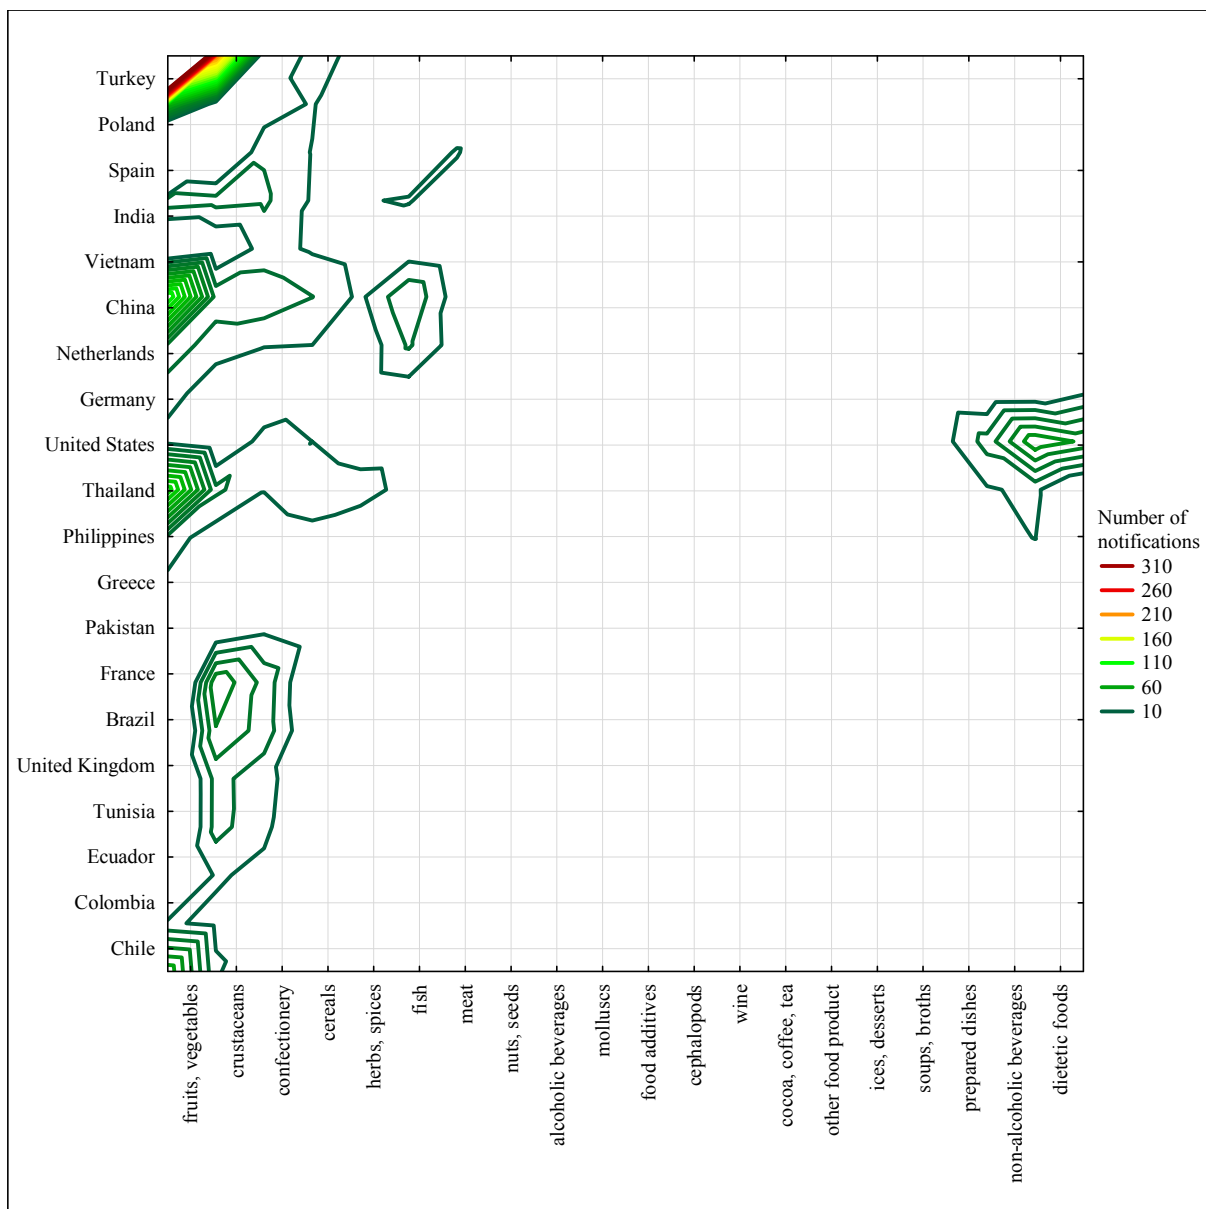

cephalopods – cephalopods and products thereof  
 cereals – cereals and bakery products  
 cocoa, coffee, tea – cocoa and cocoa preparations, coffee and tea  
 crustaceans – crustaceans and products thereof  
 dietetic foods – dietetic foods, food supplements, fortified foods  
 fish – fish and fish products  
 food additives – food additives and flavourings  
 fruits, vegetables – fruits and vegetables  
 herbs, spices – herbs and spices  
 ices, desserts – ices and desserts  
 meat – meat and meat products (other than poultry)  
 molluscs – molluscs and products thereof - (obsolete)  
 nuts, seeds – nuts, nut products and seeds  
 other food product – other food product / mixed  
 prepared dishes – prepared dishes and snacks  
 soups, broths – soups, broths, sauces and condiments

**FIGURE S52** Similarities between product category and origin country within notifications on food additives and flavourings.

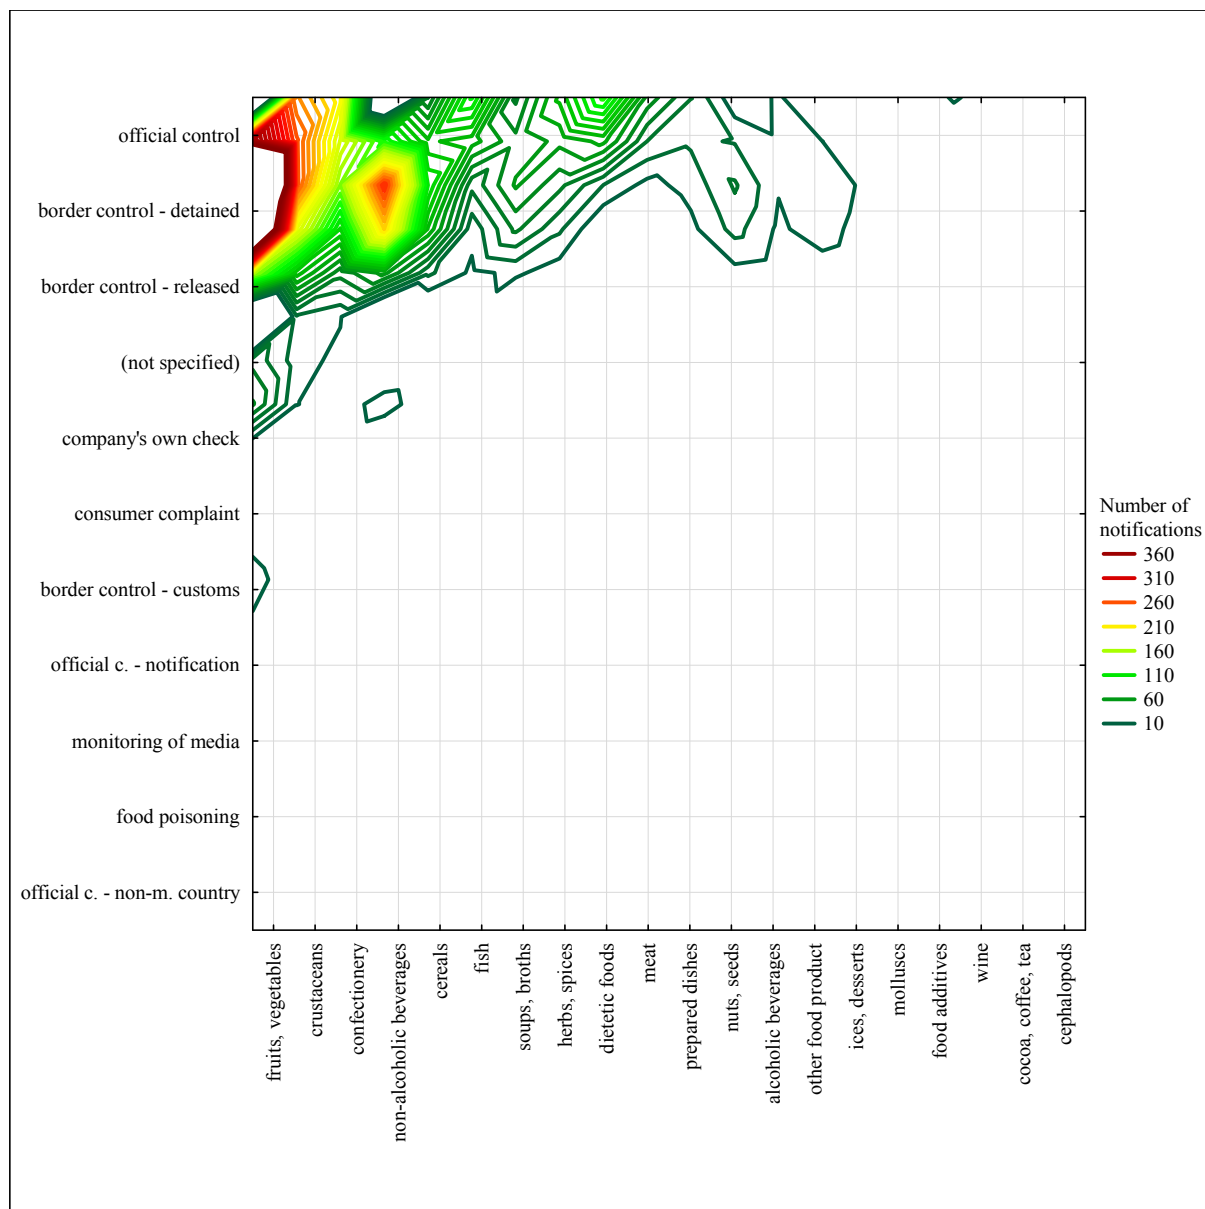

cephalopods – cephalopods and products thereof  
 cereals – cereals and bakery products  
 cocoa, coffee, tea – cocoa and cocoa preparations, coffee and tea  
 crustaceans – crustaceans and products thereof  
 dietetic foods – dietetic foods, food supplements, fortified foods  
 fish – fish and fish products  
 food additives – food additives and flavourings  
 fruits, vegetables – fruits and vegetables  
 herbs, spices – herbs and spices  
 ices, desserts – ices and desserts  
 meat – meat and meat products (other than poultry)  
 molluscs – molluscs and products thereof - (obsolete)  
 nuts, seeds – nuts, nut products and seeds  
 other food product – other food product / mixed  
 prepared dishes – prepared dishes and snacks  
 soups, broths – soups, broths, sauces and condiments

border control - detained – border control - consignment detained  
 border control - released – border control - consignment released  
 border control - customs – border control - consignment under customs  
 official c. - non-m. country – official control in non-member country  
 official c. - notification – official control following RASFF notification  
 official control – official control on the market

**FIGURE S53** Similarities between product category and notification basis within notifications on food additives and flavourings.

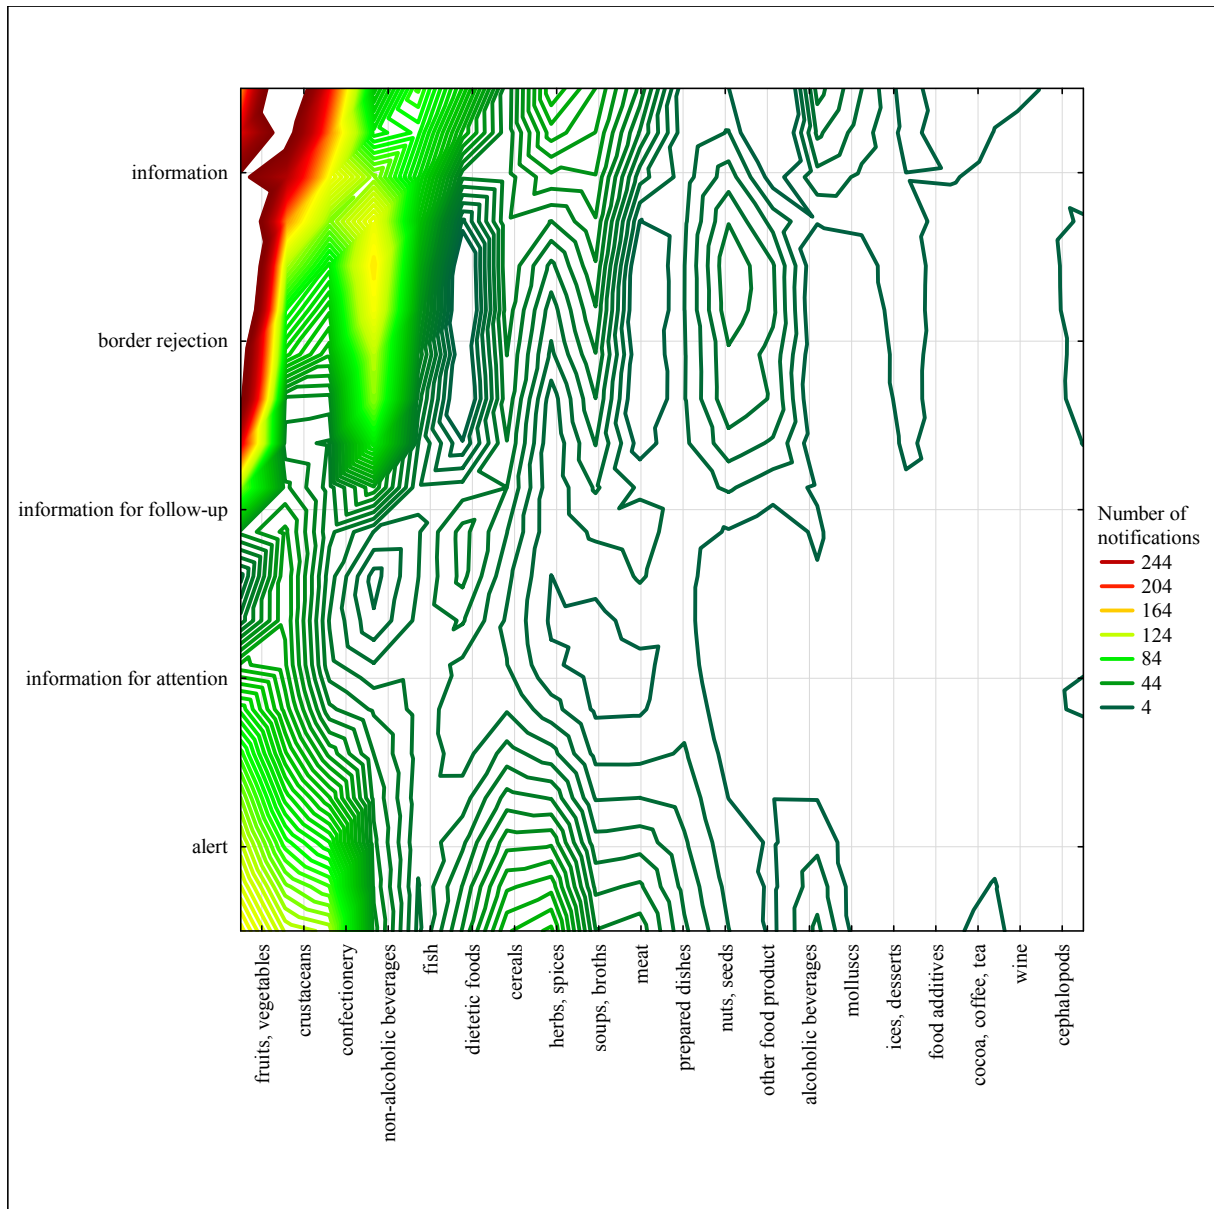

cephalopods – cephalopods and products thereof  
 cereals – cereals and bakery products  
 cocoa, coffee, tea – cocoa and cocoa preparations, coffee and tea  
 crustaceans – crustaceans and products thereof  
 dietetic foods – dietetic foods, food supplements, fortified foods  
 fish – fish and fish products  
 food additives – food additives and flavourings  
 fruits, vegetables – fruits and vegetables  
 herbs, spices – herbs and spices  
 ices, desserts – ices and desserts  
 meat – meat and meat products (other than poultry)  
 molluscs – molluscs and products thereof - (obsolete)  
 nuts, seeds – nuts, nut products and seeds  
 other food product – other food product / mixed  
 prepared dishes – prepared dishes and snacks  
 soups, broths – soups, broths, sauces and condiments

**FIGURE S54** Similarities between product category and notification type within notifications on food additives and flavourings.

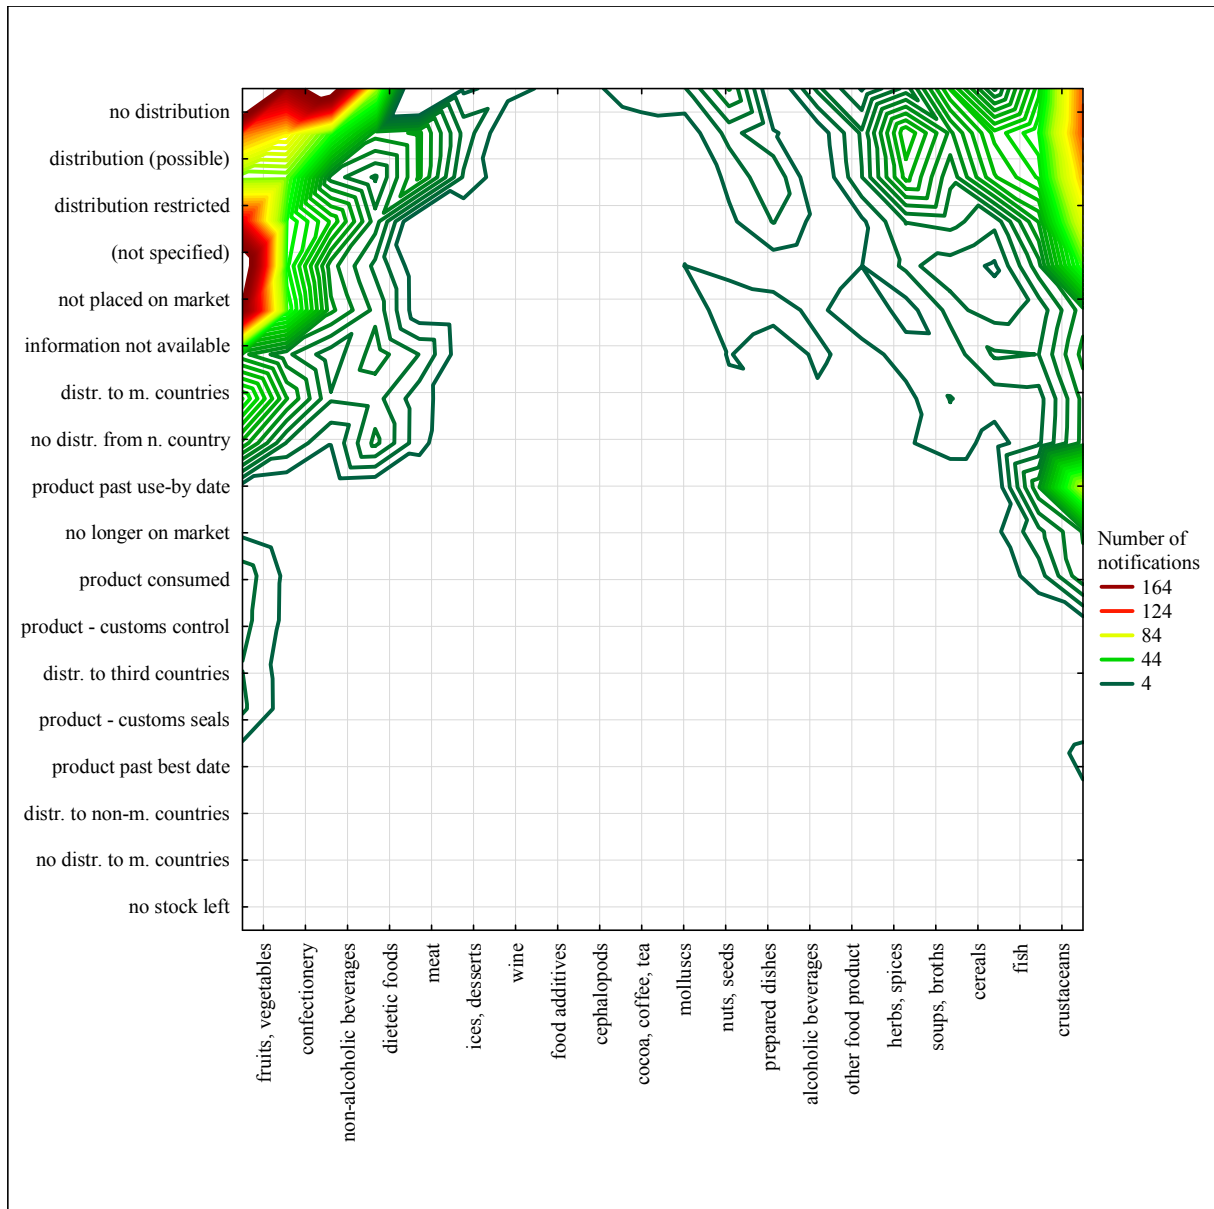

cephalopods – cephalopods and products thereof  
 cereals – cereals and bakery products  
 cocoa, coffee, tea – cocoa and cocoa preparations, coffee and tea  
 crustaceans – crustaceans and products thereof  
 dietetic foods – dietetic foods, food supplements, fortified foods  
 fish – fish and fish products  
 food additives – food additives and flavourings  
 fruits, vegetables – fruits and vegetables  
 herbs, spices – herbs and spices  
 ices, desserts – ices and desserts  
 meat – meat and meat products (other than poultry)  
 molluscs – molluscs and products thereof - (obsolete)  
 nuts, seeds – nuts, nut products and seeds  
 other food product – other food product / mixed  
 prepared dishes – prepared dishes and snacks  
 soups, broths – soups, broths, sauces and condiments

distr. to m. countries – distribution to other member countries

distr. to non-m. countries – distribution to non-member countries  
 distr. to third countries – distribution to third countries  
 distribution (possible) – distribution on the market (possible)  
 distribution restricted – distribution restricted to notifying country  
 information not available – information on distribution not (yet) available  
 no distr. from n. country – no distribution from notifying country  
 no distr. to m. countries – no distribution to other member countries  
 no longer on market – product (presumably) no longer on the market  
 not placed on market – product not (yet) placed on the market  
 product - customs control – product under customs control  
 product - customs seals – product allowed to travel to destination under customs seals  
 product consumed – product already consumed  
 product past best date – product past best before date

**FIGURE S55** Similarities between product category and distribution status within notifications on food additives and flavourings.

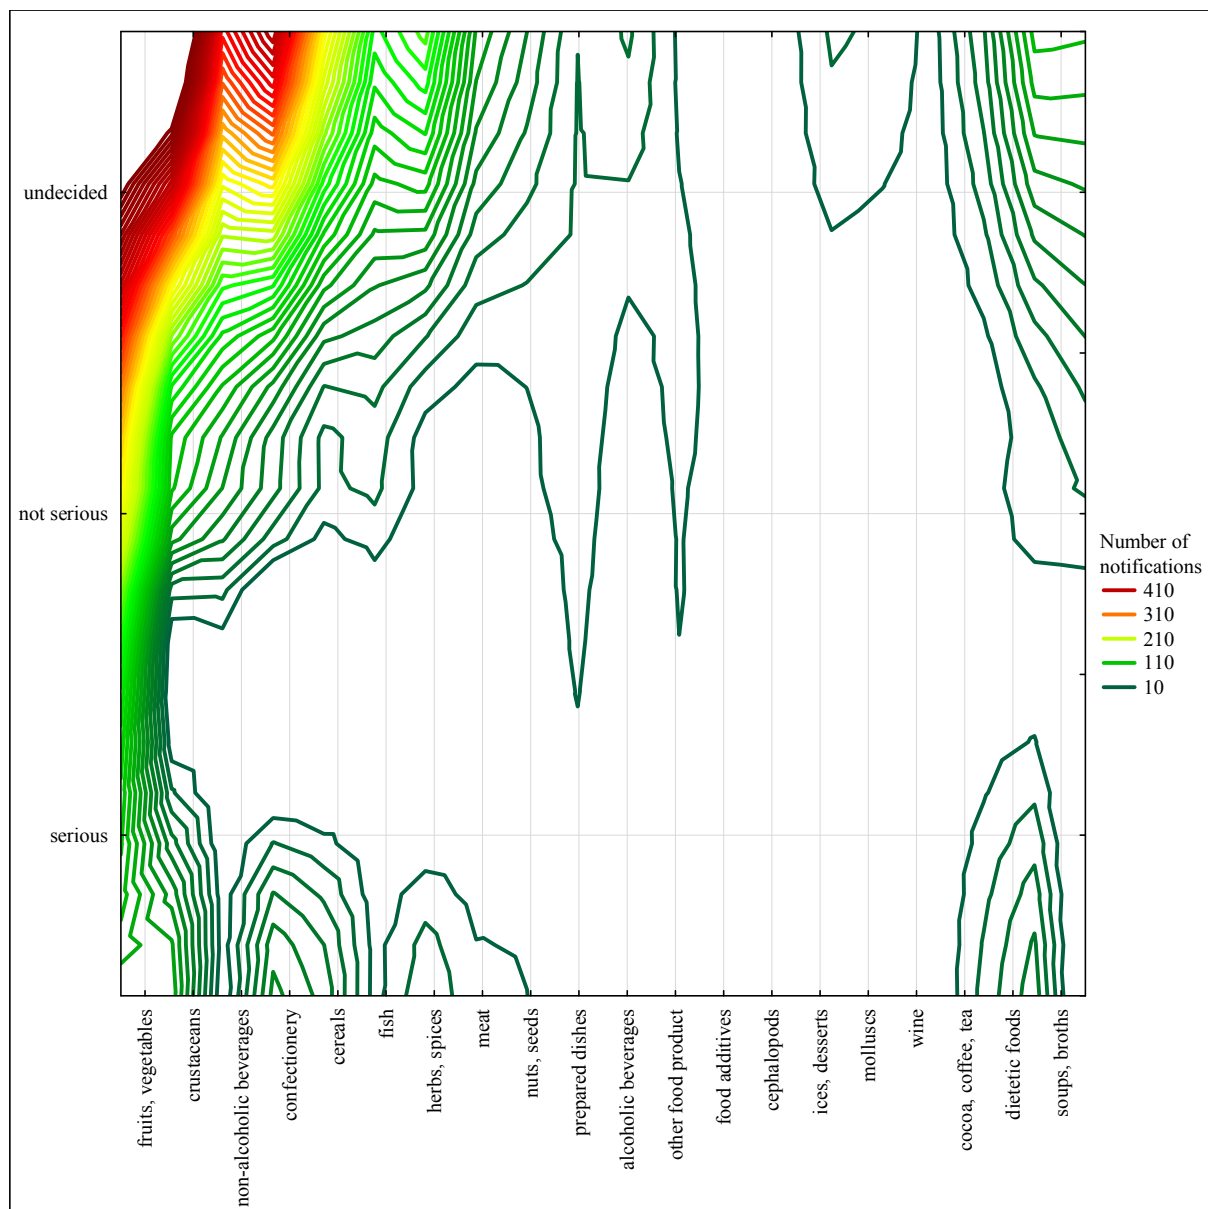

cephalopods – cephalopods and products thereof  
 cereals – cereals and bakery products  
 cocoa, coffee, tea – cocoa and cocoa preparations, coffee and tea  
 crustaceans – crustaceans and products thereof  
 dietetic foods – dietetic foods, food supplements, fortified foods  
 fish – fish and fish products  
 food additives – food additives and flavourings  
 fruits, vegetables – fruits and vegetables  
 herbs, spices – herbs and spices  
 ices, desserts – ices and desserts  
 meat – meat and meat products (other than poultry)  
 molluscs – molluscs and products thereof - (obsolete)  
 nuts, seeds – nuts, nut products and seeds  
 other food product – other food product / mixed  
 prepared dishes – prepared dishes and snacks  
 soups, broths – soups, broths, sauces and condiments

**FIGURE S56** Similarities between product category and risk decision within notifications on food additives and flavourings.



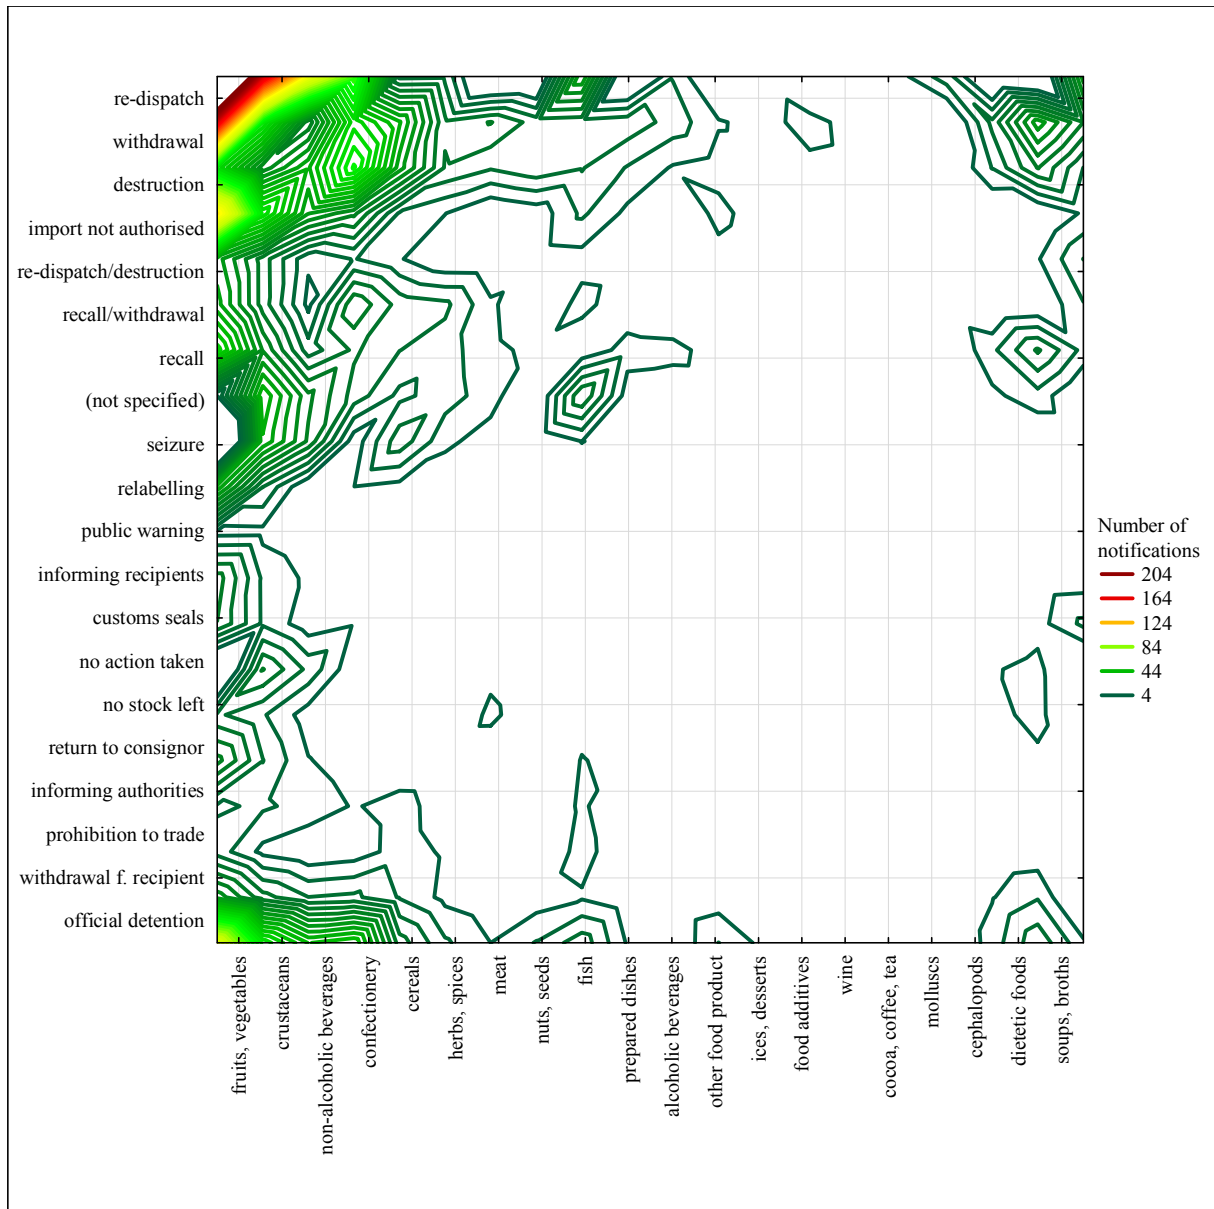

cephalopods – cephalopods and products thereof  
 cereals – cereals and bakery products  
 cocoa, coffee, tea – cocoa and cocoa preparations, coffee and tea  
 crustaceans – crustaceans and products thereof  
 dietetic foods – dietetic foods, food supplements, fortified foods  
 fish – fish and fish products  
 food additives – food additives and flavourings  
 fruits, vegetables – fruits and vegetables  
 herbs, spices – herbs and spices  
 ices, desserts – ices and desserts  
 meat – meat and meat products (other than poultry)  
 molluscs – molluscs and products thereof (obsolete)  
 nuts, seeds – nuts, nut products and seeds  
 other food product – other food product / mixed  
 prepared dishes – prepared dishes and snacks  
 soups, broths – soups, broths, sauces and condiments

customs seals – placed under customs seals  
 prohibition to trade – prohibition to trade - sales ban  
 public warning – public warning - press release  
 recall – recall from consumers  
 recall/withdrawal – product recall or withdrawal  
 re-dispatch/destruction – re-dispatch or destruction  
 withdrawal – withdrawal from the market  
 withdrawal f. recipient – withdrawal from recipient(s)

**FIGURE S57** Similarities between product category and action taken within notifications on food additives and flavourings.

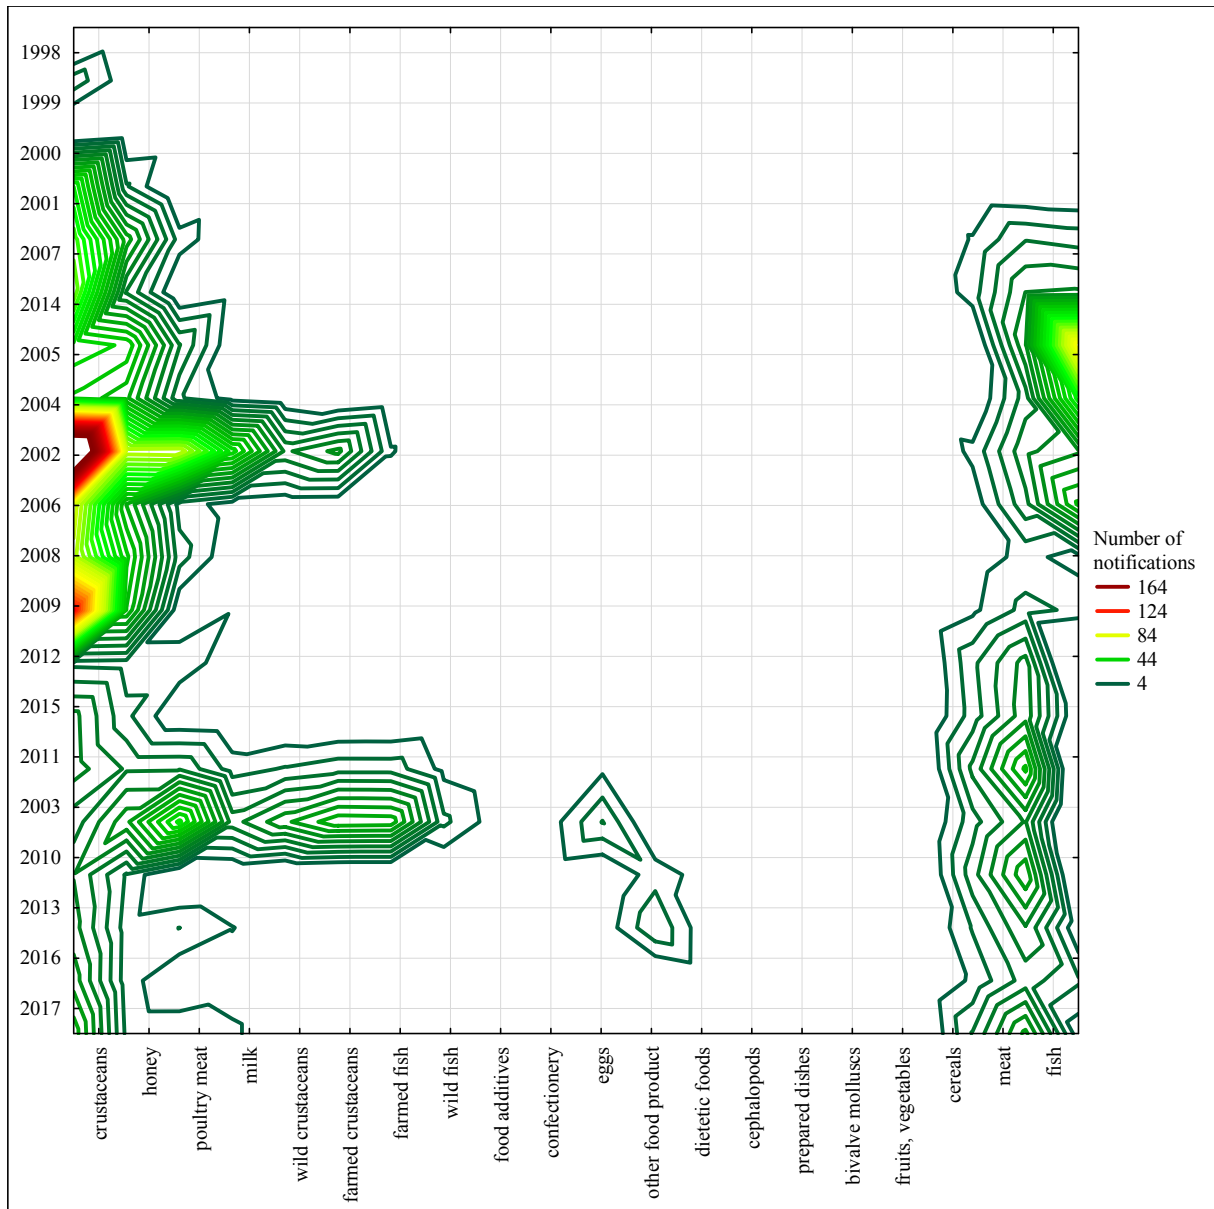

bivalve molluscs – bivalve molluscs and products thereof  
 cephalopods – cephalopods and products thereof  
 cereals – cereals and bakery products  
 crustaceans – crustaceans and products thereof  
 dietetic foods – dietetic foods, food supplements, fortified foods  
 eggs – eggs and egg products  
 farmed crustaceans – farmed crustaceans and products thereof - (obsolete)  
 farmed fish – farmed fish and products thereof (other than crustaceans and molluscs) - (obsolete)  
 fish – fish and fish products  
 food additives – food additives and flavourings  
 fruits, vegetables – fruits and vegetables  
 honey – honey and royal jelly  
 meat – meat and meat products (other than poultry)  
 milk – milk and milk products  
 other food product – other food product / mixed  
 poultry meat – poultry meat and poultry meat products  
 prepared dishes – prepared dishes and snacks  
 wild fish – wild caught fish and products thereof (other than crustaceans and molluscs) - (obsolete)  
 wild crustaceans – wild caught crustaceans and products thereof - (obsolete)

**FIGURE S58** Similarities between product category and year within notifications on residues of veterinary medicinal products.

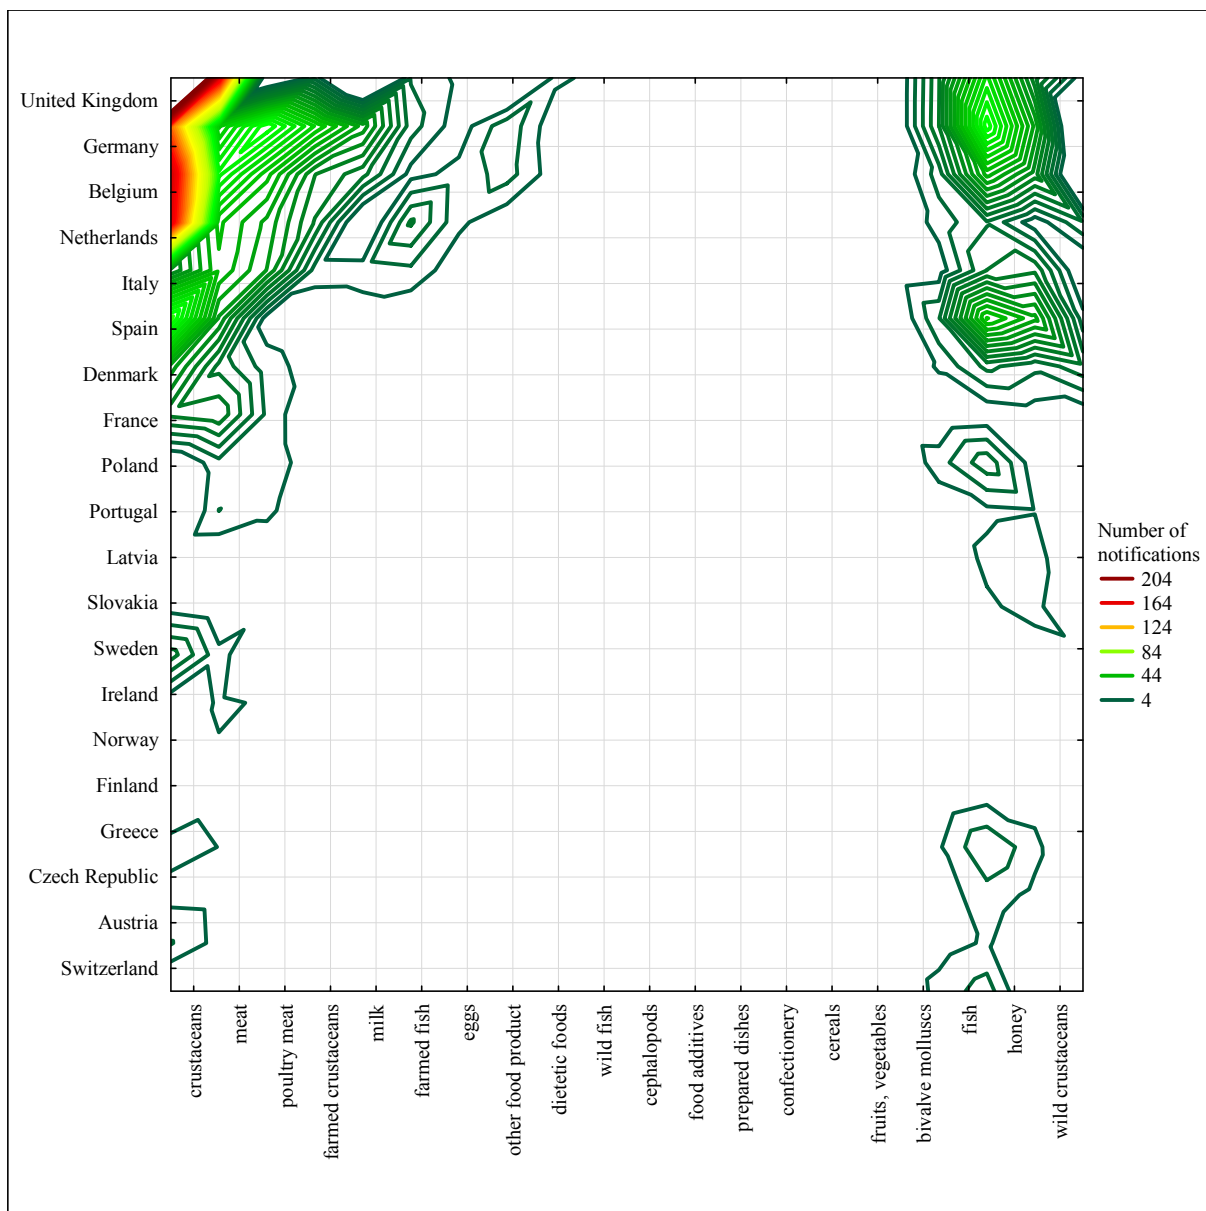

bivalve molluscs – bivalve molluscs and products thereof  
 cephalopods – cephalopods and products thereof  
 cereals – cereals and bakery products  
 crustaceans – crustaceans and products thereof  
 dietetic foods – dietetic foods, food supplements, fortified foods  
 eggs – eggs and egg products  
 farmed crustaceans – farmed crustaceans and products thereof - (obsolete)  
 farmed fish – farmed fish and products thereof (other than crustaceans and molluscs) - (obsolete)  
 fish – fish and fish products  
 food additives – food additives and flavourings  
 fruits, vegetables – fruits and vegetables  
 honey – honey and royal jelly  
 meat – meat and meat products (other than poultry)  
 milk – milk and milk products  
 other food product – other food product / mixed  
 poultry meat – poultry meat and poultry meat products  
 prepared dishes – prepared dishes and snacks  
 wild fish – wild caught fish and products thereof (other than crustaceans and molluscs) - (obsolete)  
 wild crustaceans – wild caught crustaceans and products thereof - (obsolete)

**FIGURE S59** Similarities between product category and notifying country within notifications on residues of veterinary medicinal products.

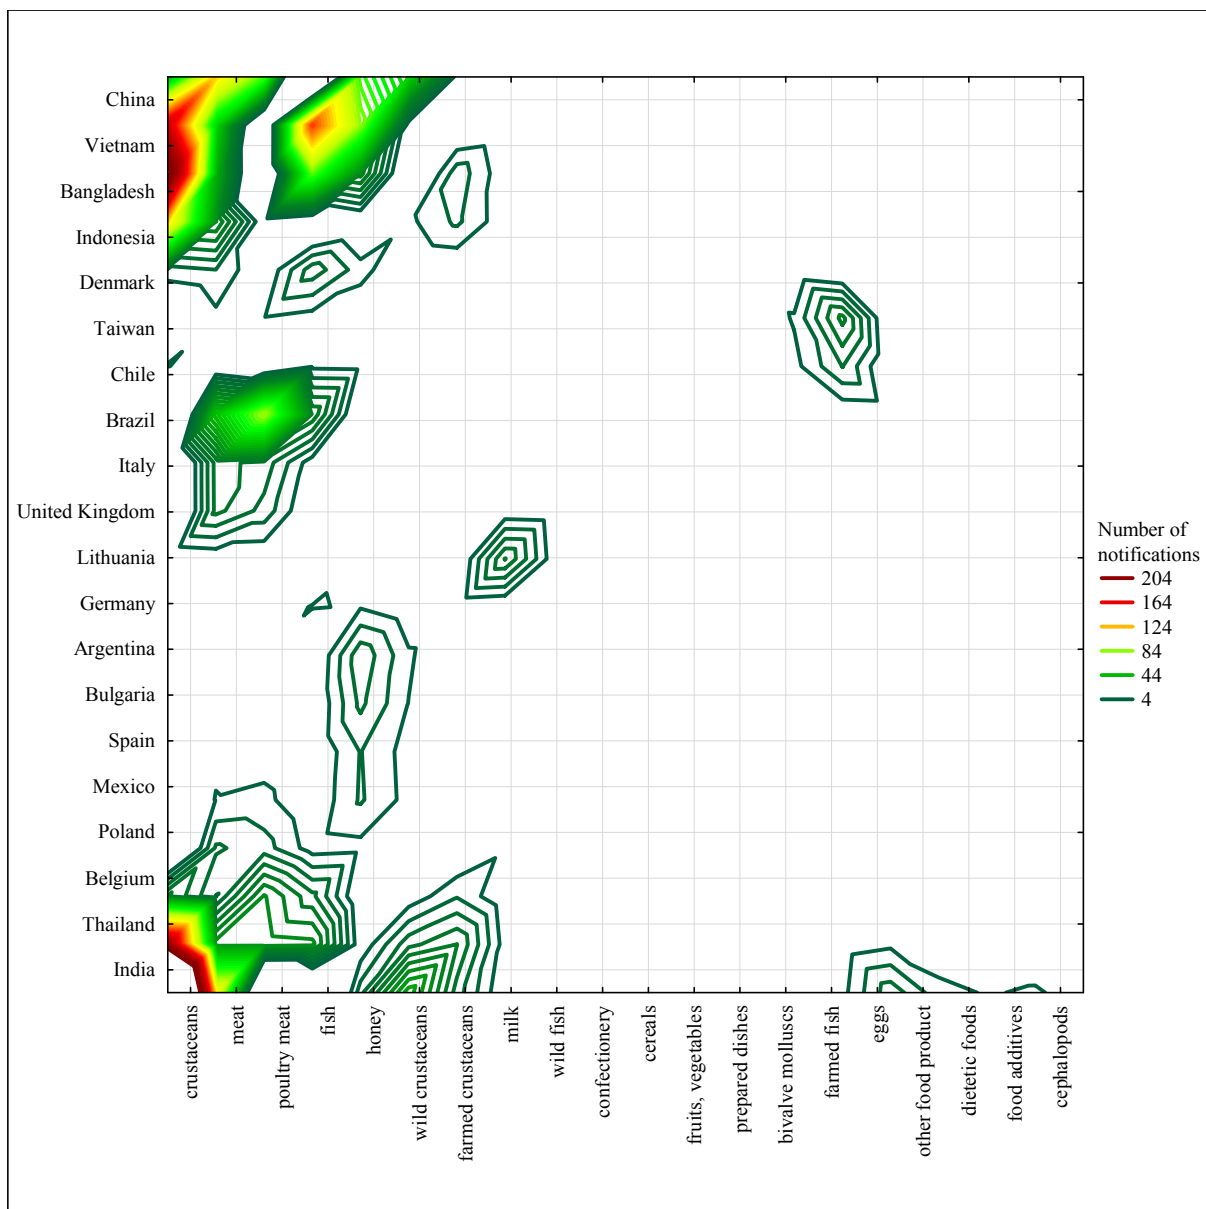

bivalve molluscs – bivalve molluscs and products thereof  
 cephalopods – cephalopods and products thereof  
 cereals – cereals and bakery products  
 crustaceans – crustaceans and products thereof  
 dietetic foods – dietetic foods, food supplements, fortified foods  
 eggs – eggs and egg products  
 farmed crustaceans – farmed crustaceans and products thereof - (obsolete)  
 farmed fish – farmed fish and products thereof (other than crustaceans and molluscs) - (obsolete)  
 fish – fish and fish products  
 food additives – food additives and flavourings  
 fruits, vegetables – fruits and vegetables  
 honey – honey and royal jelly  
 meat – meat and meat products (other than poultry)  
 milk – milk and milk products  
 other food product – other food product / mixed  
 poultry meat – poultry meat and poultry meat products  
 prepared dishes – prepared dishes and snacks  
 wild fish – wild caught fish and products thereof (other than crustaceans and molluscs) - (obsolete)  
 wild crustaceans – wild caught crustaceans and products thereof - (obsolete)

**FIGURE S60** Similarities between product category and origin country within notifications on residues of veterinary medicinal products.

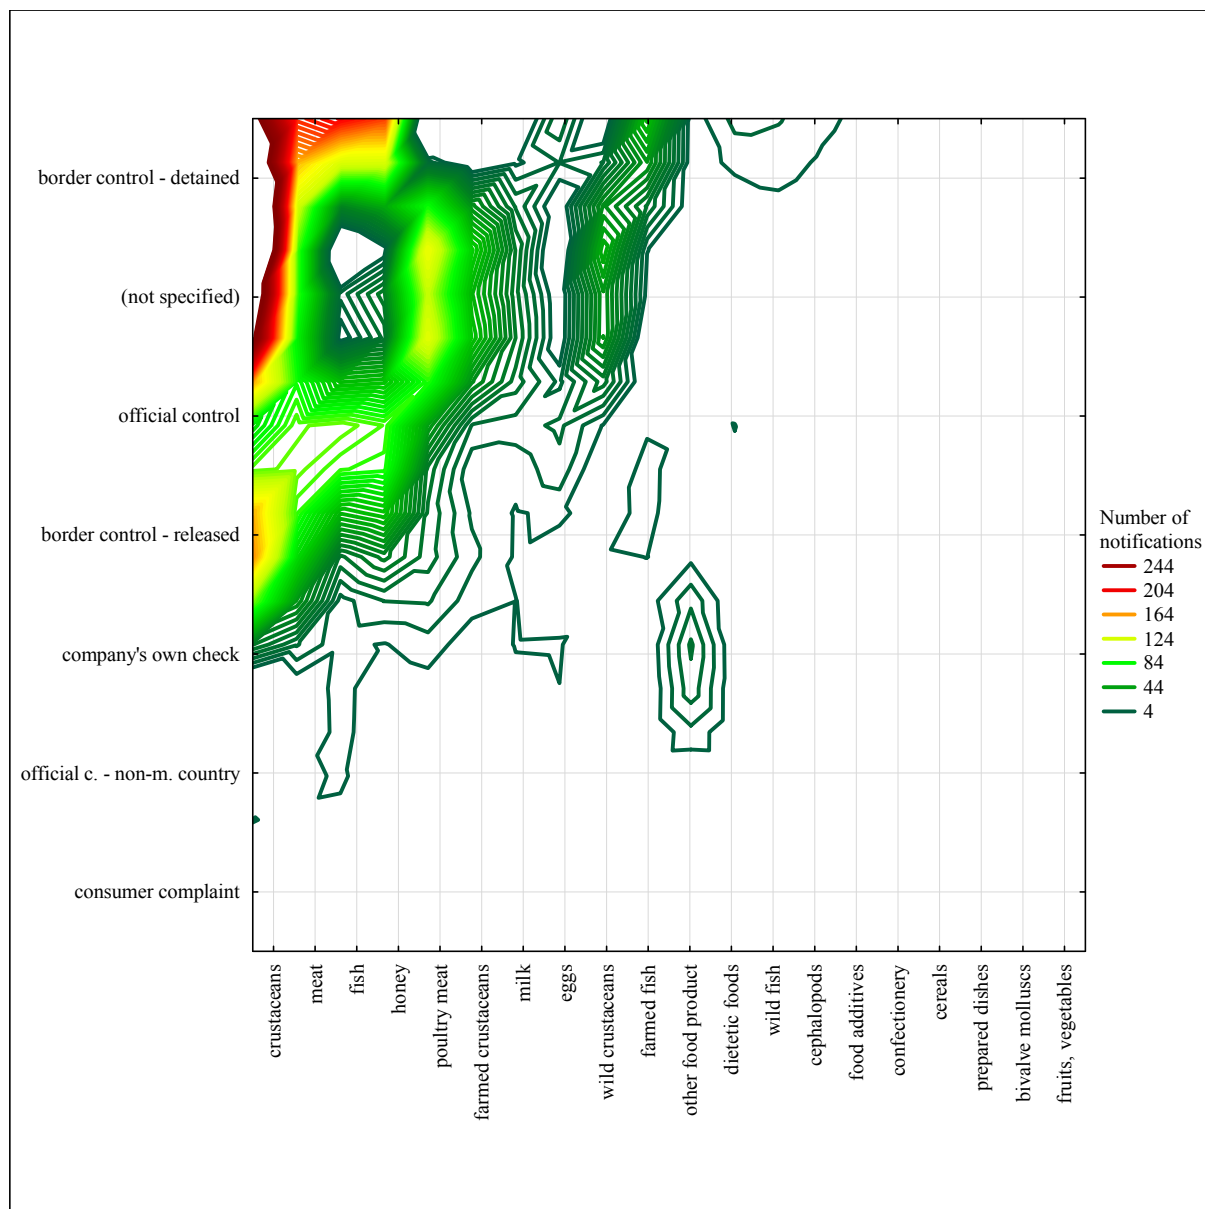

bivalve molluscs – bivalve molluscs and products thereof  
 cephalopods – cephalopods and products thereof  
 cereals – cereals and bakery products  
 crustaceans – crustaceans and products thereof  
 dietetic foods – dietetic foods, food supplements, fortified foods  
 eggs – eggs and egg products  
 farmed crustaceans – farmed crustaceans and products thereof - (obsolete)  
 farmed fish – farmed fish and products thereof (other than crustaceans and molluscs) - (obsolete)  
 fish – fish and fish products  
 food additives – food additives and flavourings  
 fruits, vegetables – fruits and vegetables  
 honey – honey and royal jelly  
 meat – meat and meat products (other than poultry)  
 milk – milk and milk products  
 other food product – other food product / mixed  
 poultry meat – poultry meat and poultry meat products  
 prepared dishes – prepared dishes and snacks  
 wild fish – wild caught fish and products thereof (other than crustaceans and molluscs) - (obsolete)  
 wild crustaceans – wild caught crustaceans and products thereof - (obsolete)

border control - detained – border control - consignment detained  
 border control - released – border control - consignment released  
 official c. - non-m. country – official control in non-member country  
 official control – official control on the market

**FIGURE S61** Similarities between product category and notification basis within notifications on residues of veterinary medicinal products.

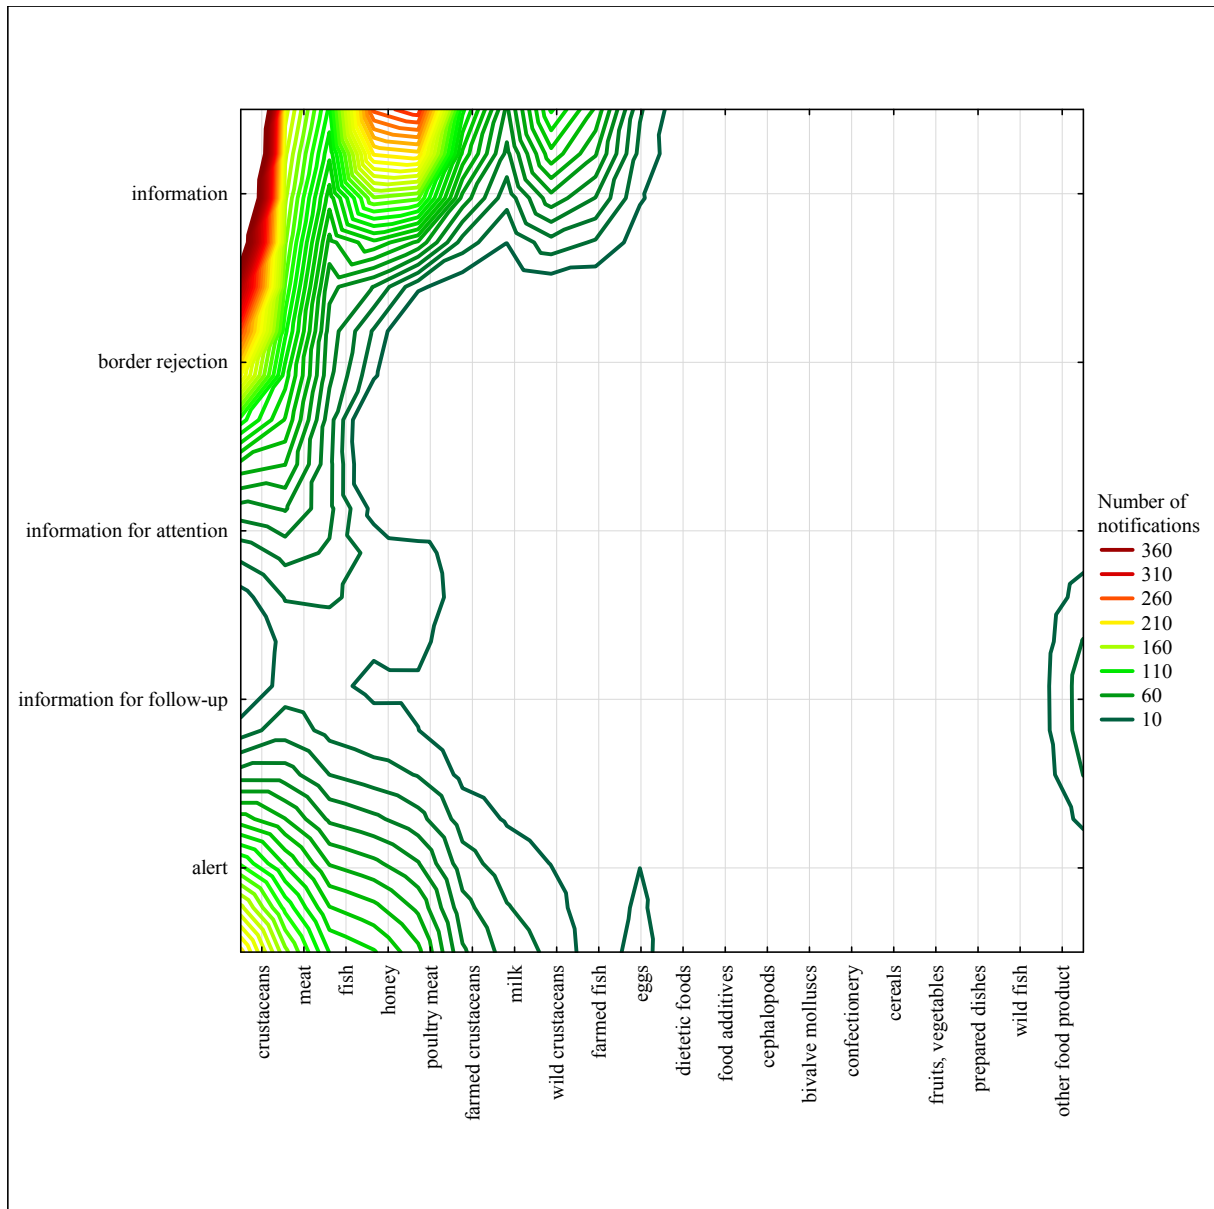

bivalve molluscs – bivalve molluscs and products thereof  
 cephalopods – cephalopods and products thereof  
 cereals – cereals and bakery products  
 crustaceans – crustaceans and products thereof  
 dietetic foods – dietetic foods, food supplements, fortified foods  
 eggs – eggs and egg products  
 farmed crustaceans – farmed crustaceans and products thereof - (obsolete)  
 farmed fish – farmed fish and products thereof (other than crustaceans and molluscs) - (obsolete)  
 fish – fish and fish products  
 food additives – food additives and flavourings  
 fruits, vegetables – fruits and vegetables  
 honey – honey and royal jelly  
 meat – meat and meat products (other than poultry)  
 milk – milk and milk products  
 other food product – other food product / mixed  
 poultry meat – poultry meat and poultry meat products  
 prepared dishes – prepared dishes and snacks  
 wild fish – wild caught fish and products thereof (other than crustaceans and molluscs) - (obsolete)  
 wild crustaceans – wild caught crustaceans and products thereof - (obsolete)

**FIGURE S62** Similarities between product category and notification type within notifications on residues of veterinary medicinal products.

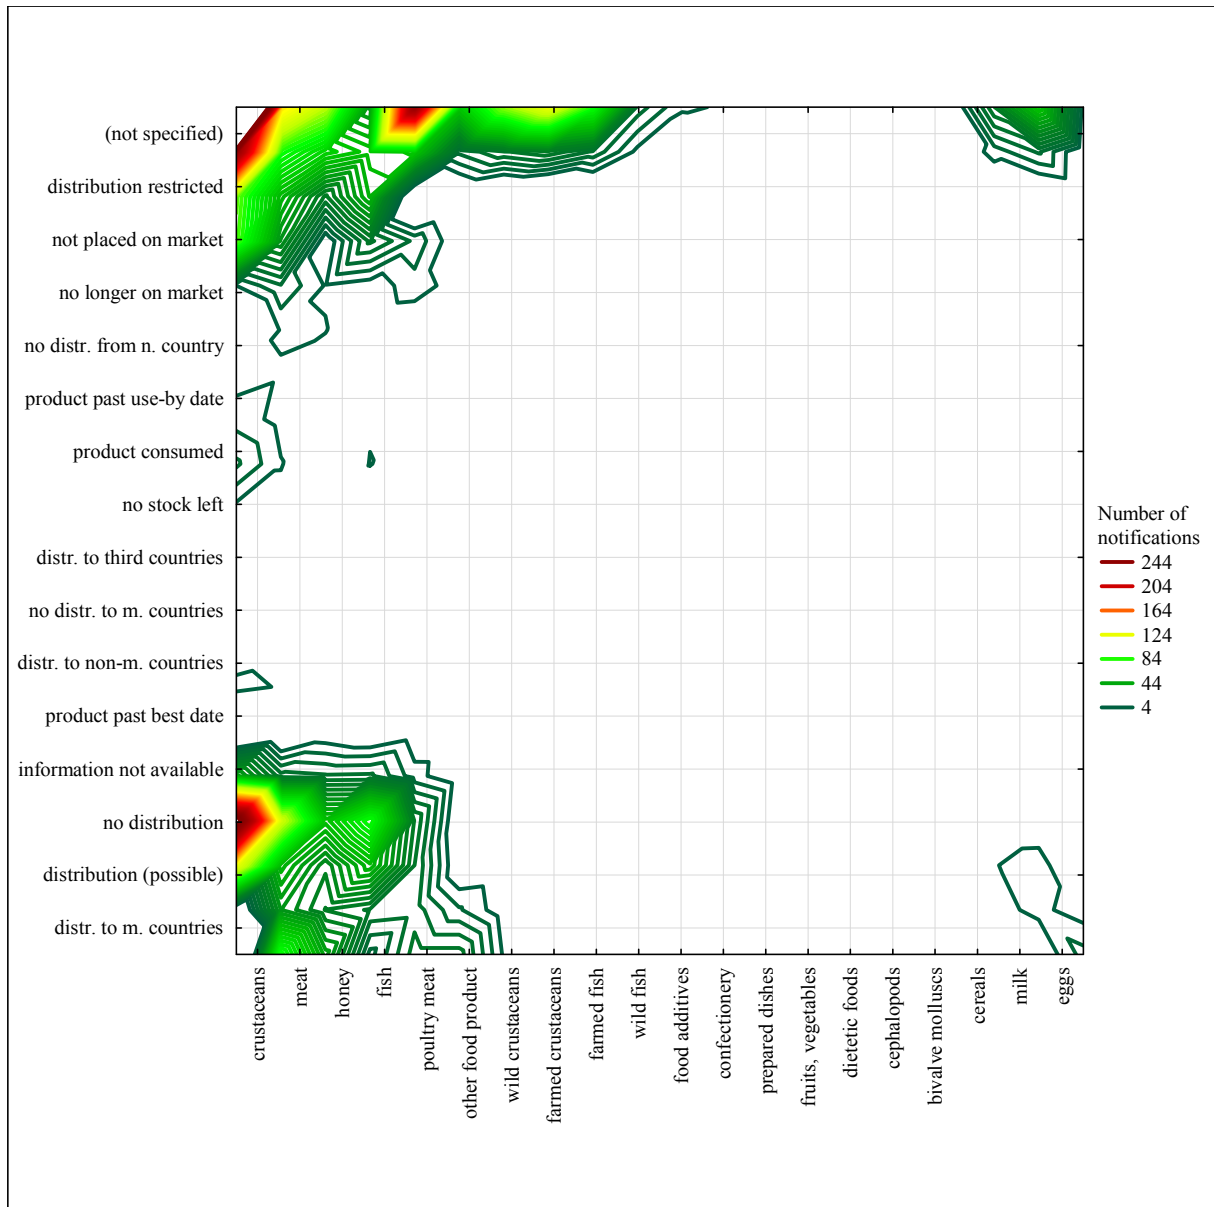

bivalve molluscs – bivalve molluscs and products thereof  
 cephalopods – cephalopods and products thereof  
 cereals – cereals and bakery products  
 crustaceans – crustaceans and products thereof  
 dietetic foods – dietetic foods, food supplements, fortified foods  
 eggs – eggs and egg products  
 farmed crustaceans – farmed crustaceans and products thereof - (obsolete)  
 farmed fish – farmed fish and products thereof (other than crustaceans and molluscs) - (obsolete)  
 fish – fish and fish products  
 food additives – food additives and flavourings  
 fruits, vegetables – fruits and vegetables  
 honey – honey and royal jelly  
 meat – meat and meat products (other than poultry)  
 milk – milk and milk products  
 other food product – other food product / mixed  
 poultry meat – poultry meat and poultry meat products  
 prepared dishes – prepared dishes and snacks

wild fish – wild caught fish and products thereof (other than crustaceans and molluscs) - (obsolete)  
 wild crustaceans – wild caught crustaceans and products thereof - (obsolete)  
 distr. to m. countries – distribution to other member countries  
 distr. to non-m. countries – distribution to non-member countries  
 distr. to third countries – distribution to third countries  
 distribution (possible) – distribution on the market (possible)  
 distribution restricted – distribution restricted to notifying country  
 information not available – information on distribution not (yet) available  
 no distr. from n. country – no distribution from notifying country  
 no distr. to m. countries – no distribution to other member countries  
 no longer on market – product (presumably) no longer on the market  
 not placed on market – product not (yet) placed on the market  
 product consumed – product already consumed

**FIGURE S63** Similarities between product category and distribution status within notifications on residues of veterinary medicinal products.

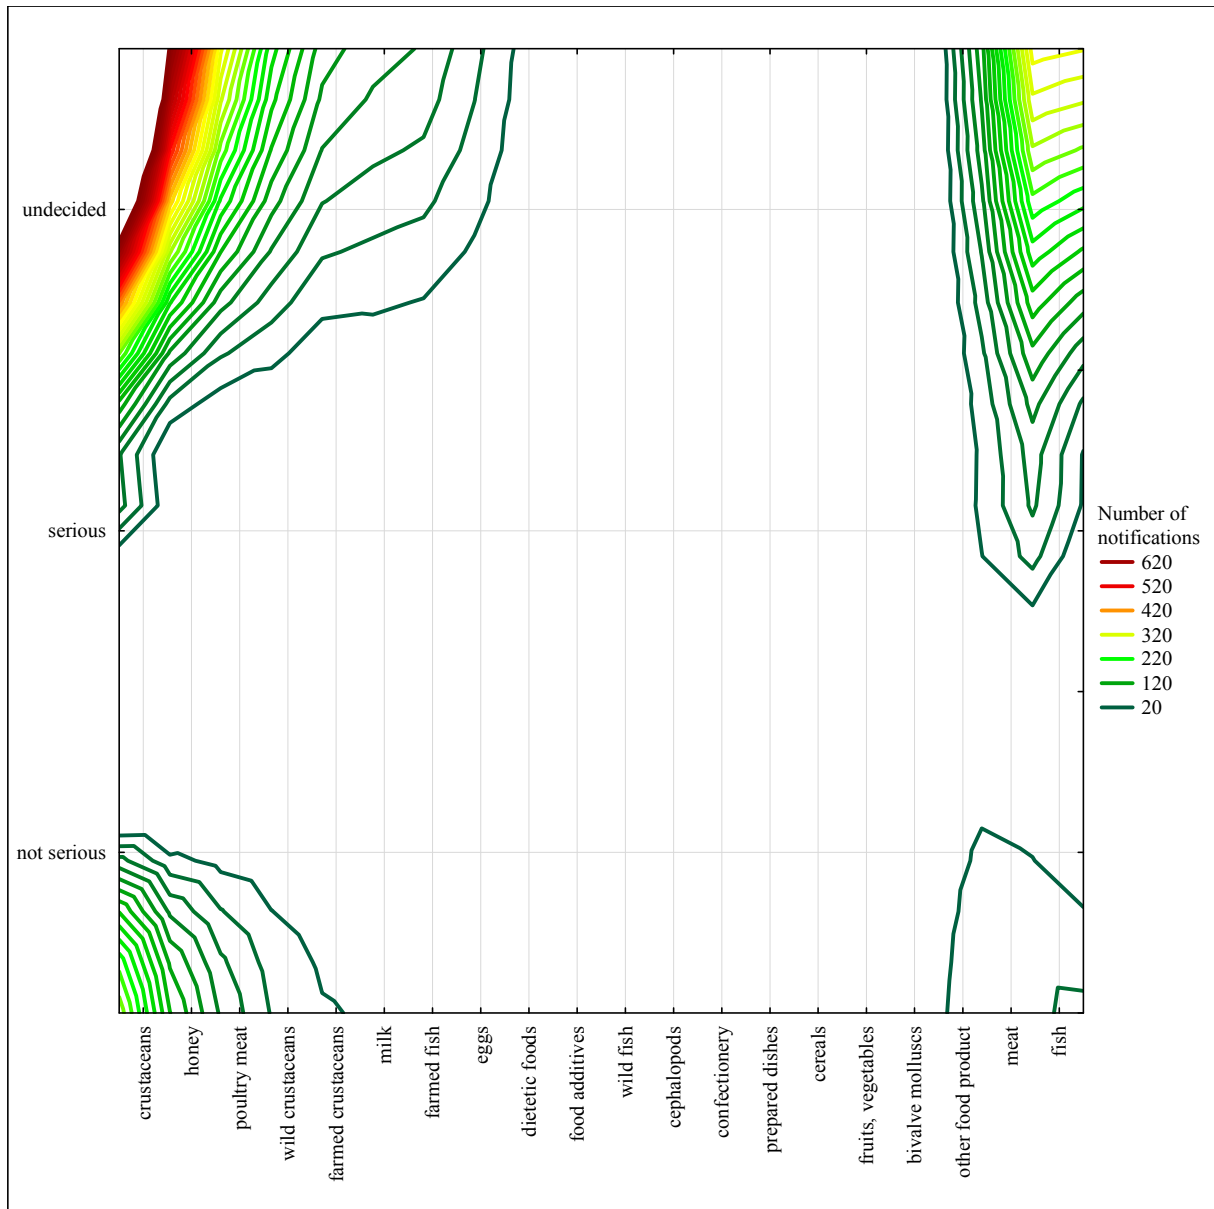

bivalve molluscs – bivalve molluscs and products thereof  
 cephalopods – cephalopods and products thereof  
 cereals – cereals and bakery products  
 crustaceans – crustaceans and products thereof  
 dietetic foods – dietetic foods, food supplements, fortified foods  
 eggs – eggs and egg products  
 farmed crustaceans – farmed crustaceans and products thereof - (obsolete)  
 farmed fish – farmed fish and products thereof (other than crustaceans and molluscs) - (obsolete)  
 fish – fish and fish products  
 food additives – food additives and flavourings  
 fruits, vegetables – fruits and vegetables  
 honey – honey and royal jelly  
 meat – meat and meat products (other than poultry)  
 milk – milk and milk products  
 other food product – other food product / mixed  
 poultry meat – poultry meat and poultry meat products  
 prepared dishes – prepared dishes and snacks  
 wild fish – wild caught fish and products thereof (other than crustaceans and molluscs) - (obsolete)  
 wild crustaceans – wild caught crustaceans and products thereof - (obsolete)

**FIGURE S64** Similarities between product category and risk decision within notifications on residues of veterinary medicinal products.



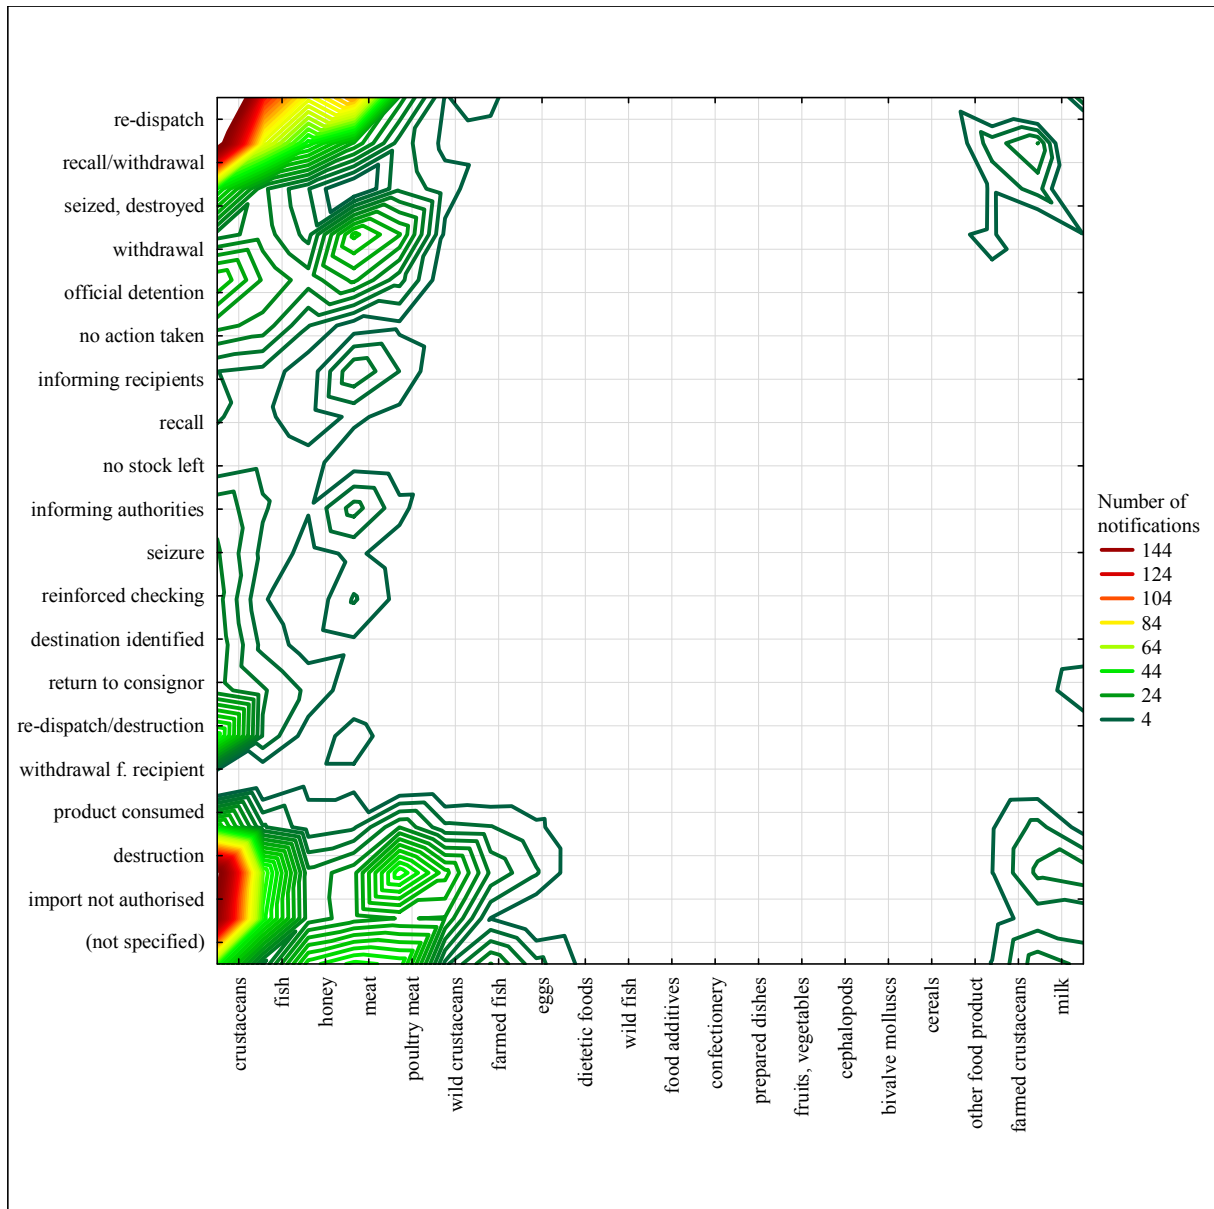

bivalve molluscs – bivalve molluscs and products thereof  
 cephalopods – cephalopods and products thereof  
 cereals – cereals and bakery products  
 crustaceans – crustaceans and products thereof  
 dietetic foods – dietetic foods, food supplements, fortified foods  
 eggs – eggs and egg products  
 farmed crustaceans – farmed crustaceans and products thereof - (obsolete)  
 farmed fish – farmed fish and products thereof (other than crustaceans and molluscs) - (obsolete)  
 fish – fish and fish products  
 food additives – food additives and flavourings  
 fruits, vegetables – fruits and vegetables  
 honey – honey and royal jelly  
 meat – meat and meat products (other than poultry)  
 milk – milk and milk products

other food product – other food product / mixed  
 poultry meat – poultry meat and poultry meat products  
 prepared dishes – prepared dishes and snacks  
 wild fish – wild caught fish and products thereof (other than crustaceans and molluscs) - (obsolete)  
 wild crustaceans – wild caught crustaceans and products thereof - (obsolete)  
 destination identified – destination of the product identified  
 product consumed – product already consumed  
 recall/withdrawal – product recall or withdrawal  
 re-dispatch/destruction – re-dispatch or destruction  
 seized, destroyed – product seized and will be destroyed  
 withdrawal – withdrawal from the market  
 withdrawal f. recipient – withdrawal from recipient(s)

**FIGURE S65** Similarities between product category and action taken within notifications on residues of veterinary medicinal products.

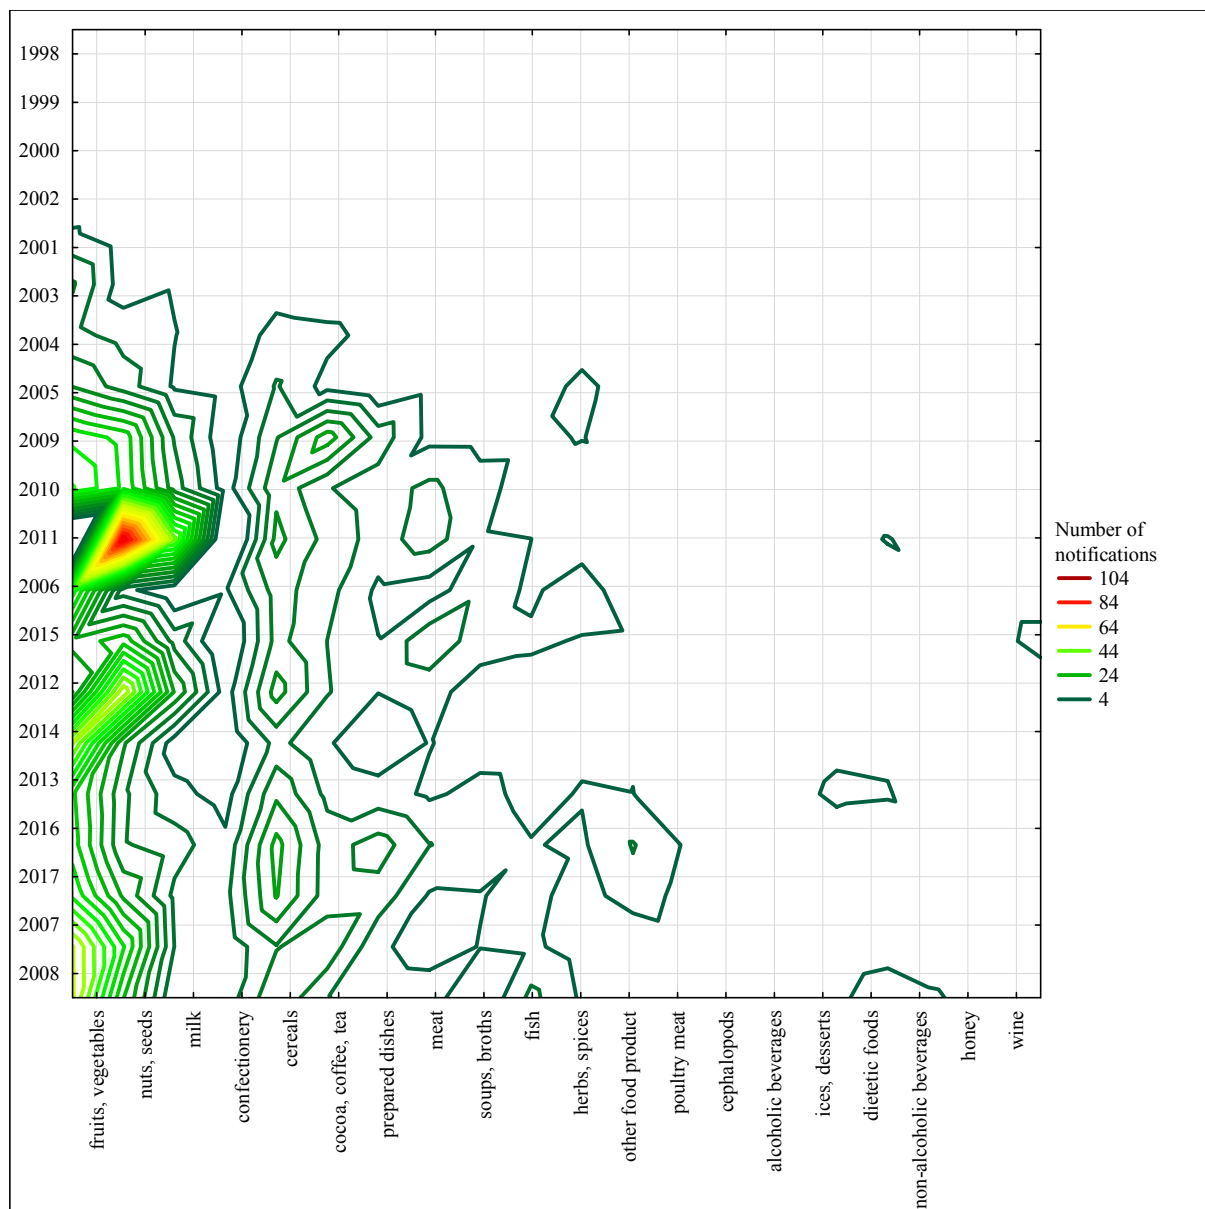

cephalopods – cephalopods and products thereof  
 cereals – cereals and bakery products  
 cocoa, coffee, tea – cocoa and cocoa preparations, coffee and tea  
 dietetic foods – dietetic foods, food supplements, fortified foods  
 fish – fish and fish products  
 fruits, vegetables – fruits and vegetables  
 herbs, spices – herbs and spices  
 honey – honey and royal jelly  
 ices, desserts – ices and desserts  
 meat – meat and meat products (other than poultry)  
 milk – milk and milk products  
 nuts, seeds – nuts, nut products and seeds  
 other food product – other food product / mixed  
 poultry meat – poultry meat and poultry meat products  
 prepared dishes – prepared dishes and snacks  
 soups, broths – soups, broths, sauces and condiments

**FIGURE S66** Similarities between product category and year within notifications on foreign bodies.

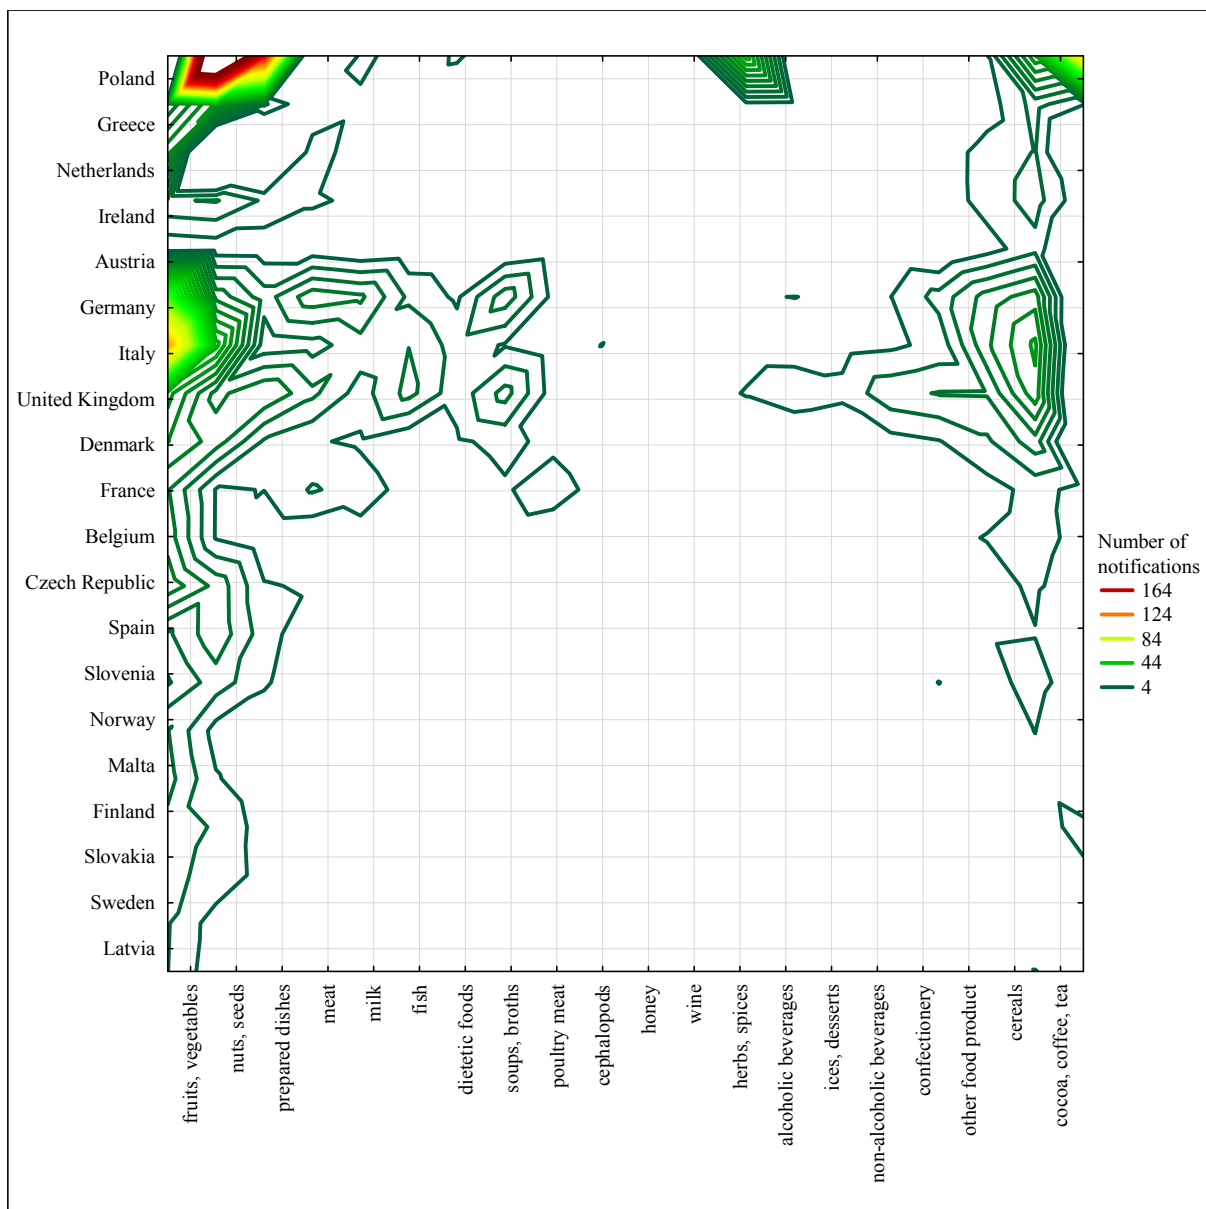

cephalopods – cephalopods and products thereof  
 cereals – cereals and bakery products  
 cocoa, coffee, tea – cocoa and cocoa preparations, coffee and tea  
 dietetic foods – dietetic foods, food supplements, fortified foods  
 fish – fish and fish products  
 fruits, vegetables – fruits and vegetables  
 herbs, spices – herbs and spices  
 honey – honey and royal jelly  
 ices, desserts – ices and desserts  
 meat – meat and meat products (other than poultry)  
 milk – milk and milk products  
 nuts, seeds – nuts, nut products and seeds  
 other food product – other food product / mixed  
 poultry meat – poultry meat and poultry meat products  
 prepared dishes – prepared dishes and snacks  
 soups, broths – soups, broths, sauces and condiments

**FIGURE S67** Similarities between product category and notifying country within notifications on foreign bodies.

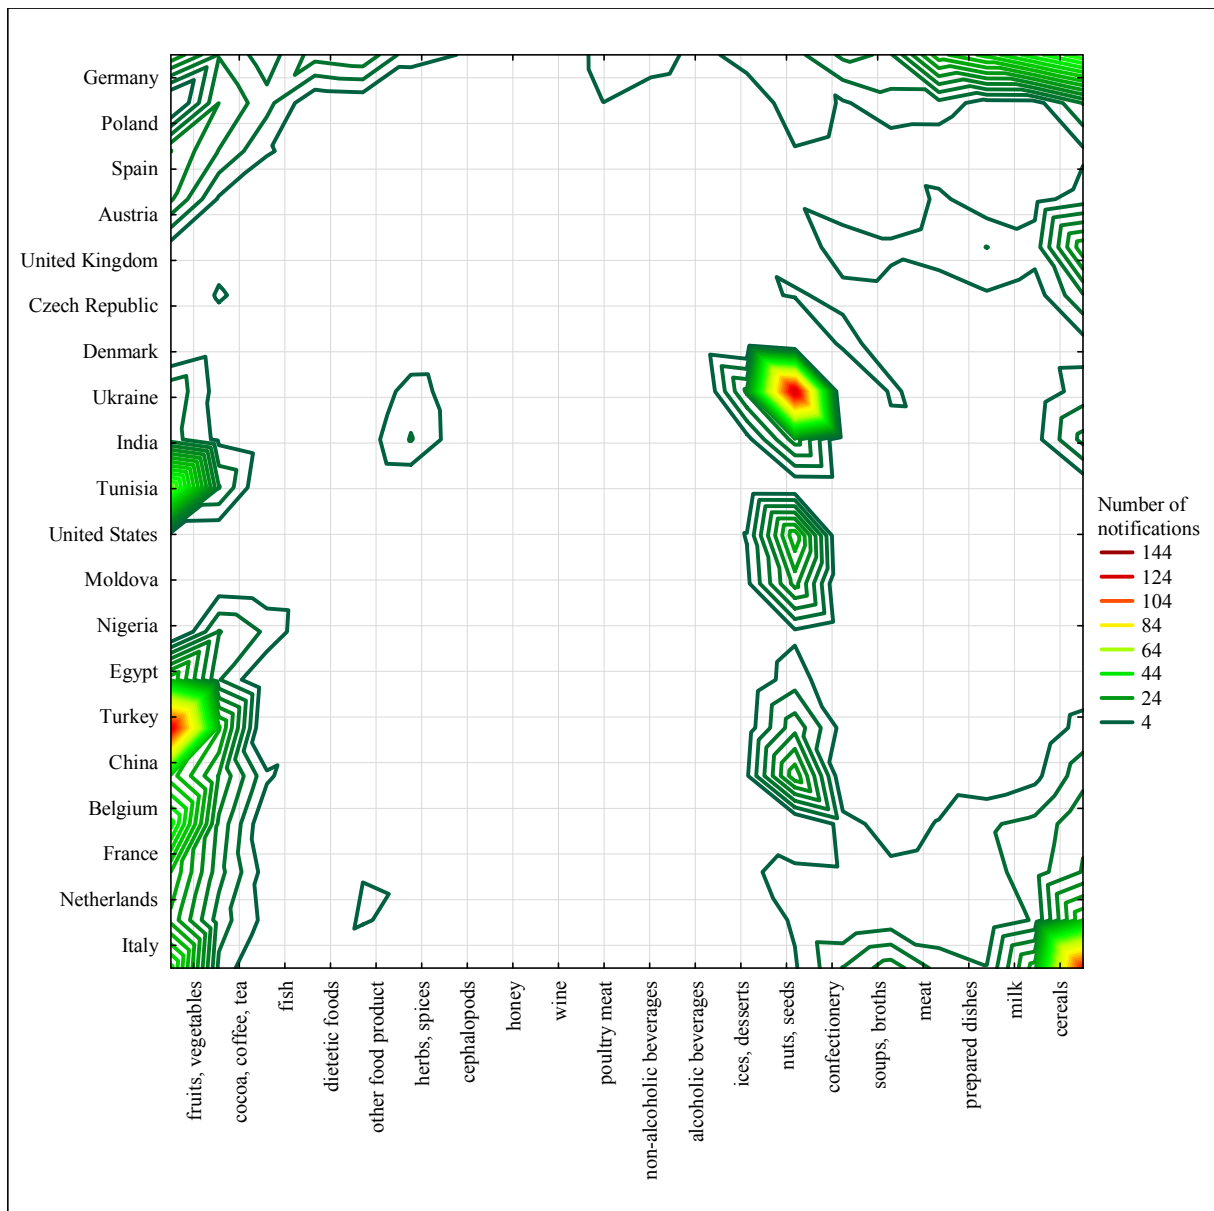

cephalopods – cephalopods and products thereof  
 cereals – cereals and bakery products  
 cocoa, coffee, tea – cocoa and cocoa preparations, coffee and tea  
 dietetic foods – dietetic foods, food supplements, fortified foods  
 fish – fish and fish products  
 fruits, vegetables – fruits and vegetables  
 herbs, spices – herbs and spices  
 honey – honey and royal jelly  
 ices, desserts – ices and desserts  
 meat – meat and meat products (other than poultry)  
 milk – milk and milk products  
 nuts, seeds – nuts, nut products and seeds  
 other food product – other food product / mixed  
 poultry meat – poultry meat and poultry meat products  
 prepared dishes – prepared dishes and snacks  
 soups, broths – soups, broths, sauces and condiments

**FIGURE S68** Similarities between product category and origin country within notifications on foreign bodies.

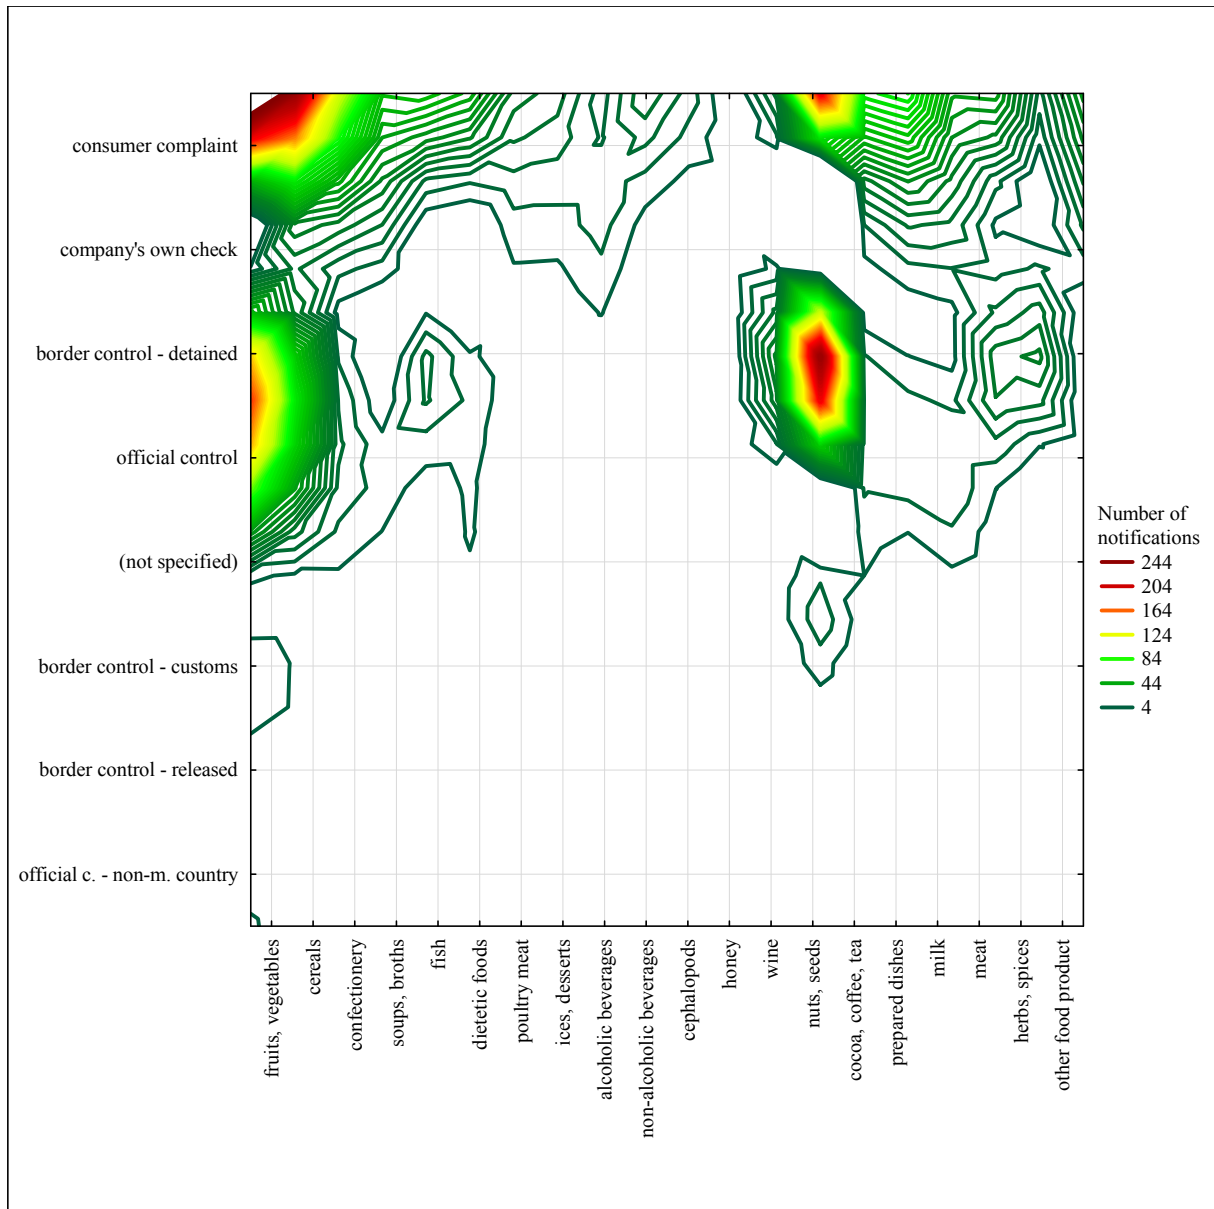

cephalopods – cephalopods and products thereof  
 cereals – cereals and bakery products  
 cocoa, coffee, tea – cocoa and cocoa preparations, coffee and tea  
 dietetic foods – dietetic foods, food supplements, fortified foods  
 fish – fish and fish products  
 fruits, vegetables – fruits and vegetables  
 herbs, spices – herbs and spices  
 honey – honey and royal jelly  
 ices, desserts – ices and desserts  
 meat – meat and meat products (other than poultry)  
 milk – milk and milk products  
 nuts, seeds – nuts, nut products and seeds  
 other food product – other food product / mixed  
 poultry meat – poultry meat and poultry meat products  
 prepared dishes – prepared dishes and snacks  
 soups, broths – soups, broths, sauces and condiments

border control - customs – border control - consignment under customs  
 border control - detained – border control - consignment detained  
 border control - released – border control - consignment released  
 official c. - non-m. country – official control in non-member country  
 official control – official control on the market

**FIGURE S69** Similarities between product category and notification basis within notifications on foreign bodies.

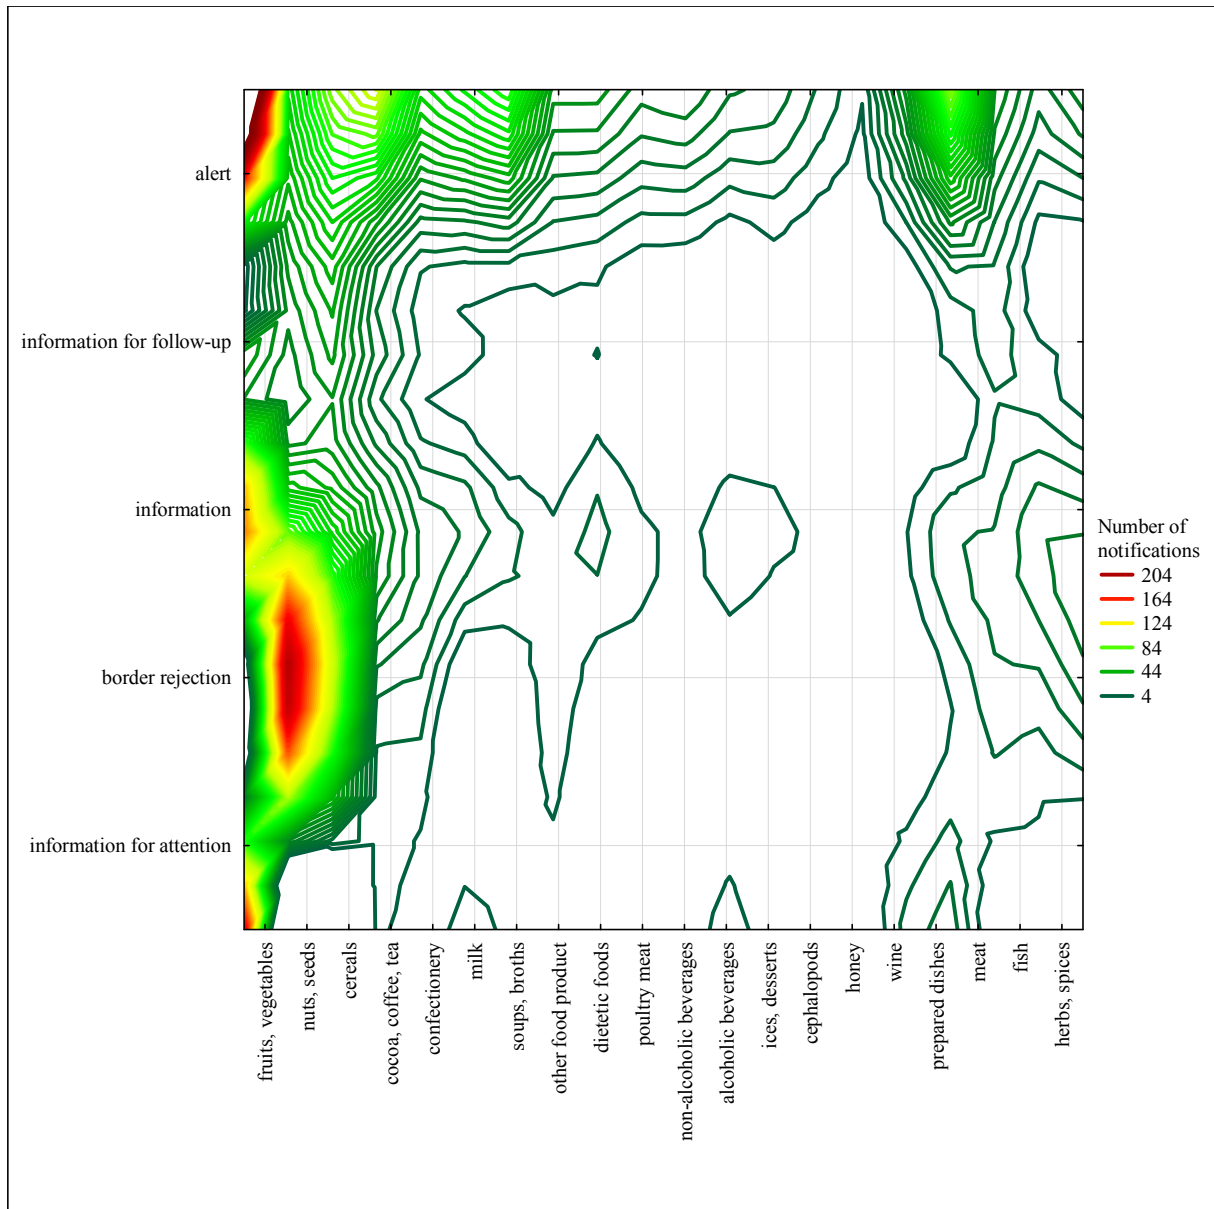

cephalopods – cephalopods and products thereof  
 cereals – cereals and bakery products  
 cocoa, coffee, tea – cocoa and cocoa preparations, coffee and tea  
 dietetic foods – dietetic foods, food supplements, fortified foods  
 fish – fish and fish products  
 fruits, vegetables – fruits and vegetables  
 herbs, spices – herbs and spices  
 honey – honey and royal jelly  
 ices, desserts – ices and desserts  
 meat – meat and meat products (other than poultry)  
 milk – milk and milk products  
 nuts, seeds – nuts, nut products and seeds  
 other food product – other food product / mixed  
 poultry meat – poultry meat and poultry meat products  
 prepared dishes – prepared dishes and snacks  
 soups, broths – soups, broths, sauces and condiments

**FIGURE S70** Similarities between product category and notification type within notifications on foreign bodies.

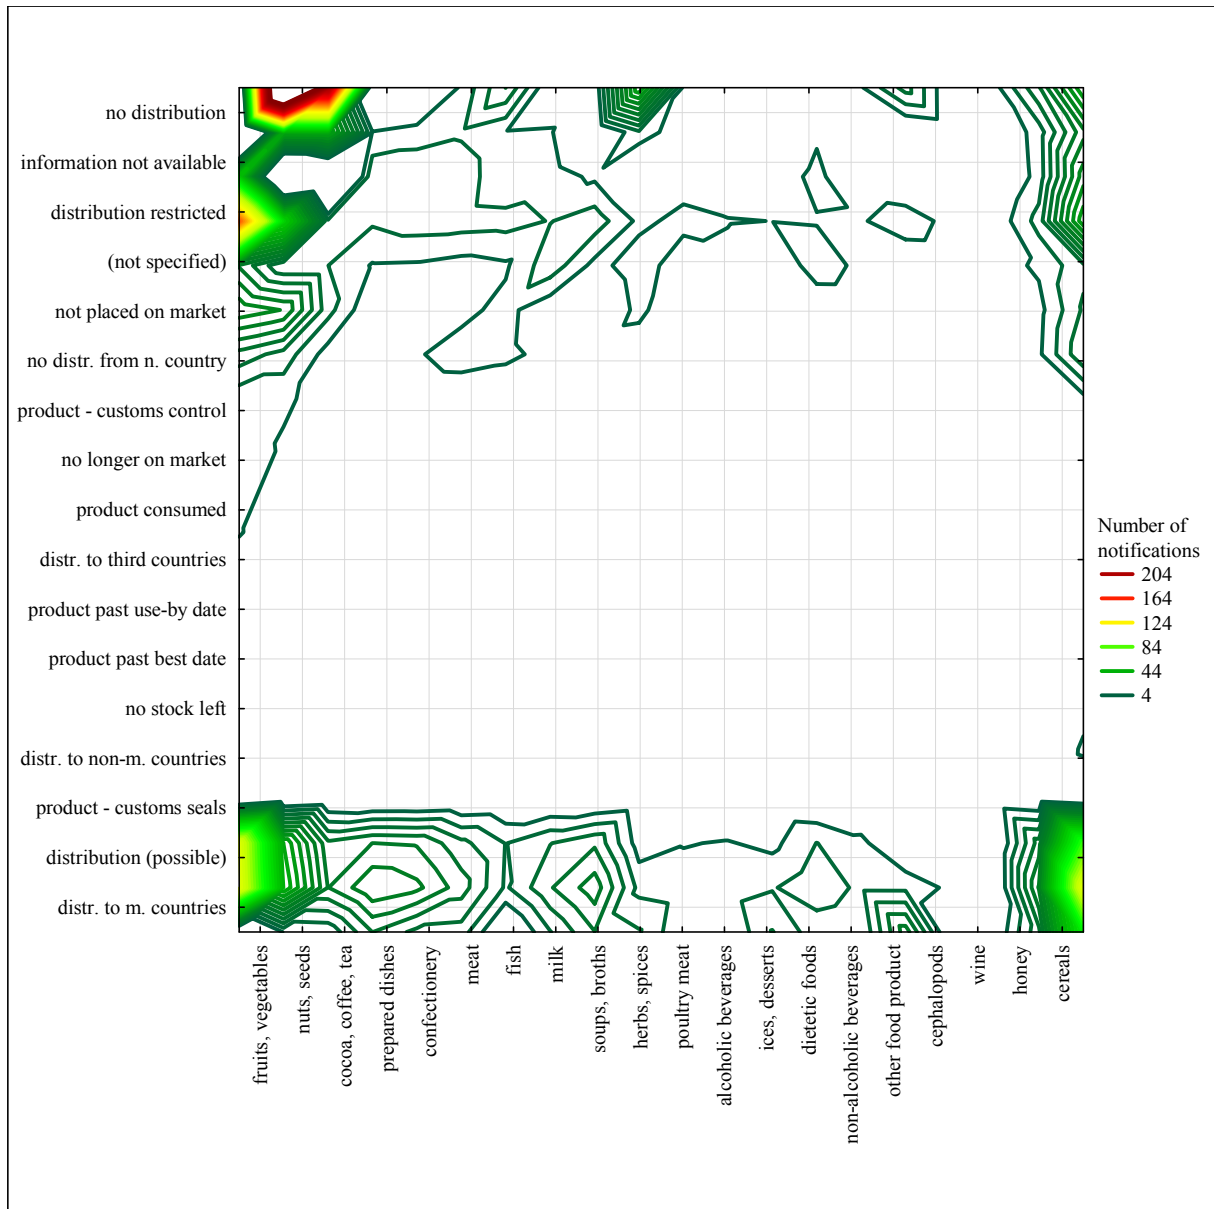

cephalopods – cephalopods and products thereof

cereals – cereals and bakery products

cocoa, coffee, tea – cocoa and cocoa preparations, coffee and tea

dietetic foods – dietetic foods, food supplements, fortified foods

fish – fish and fish products

fruits, vegetables – fruits and vegetables

herbs, spices – herbs and spices

honey – honey and royal jelly

ices, desserts – ices and desserts

meat – meat and meat products (other than poultry)

milk – milk and milk products

nuts, seeds – nuts, nut products and seeds

other food product – other food product / mixed

poultry meat – poultry meat and poultry meat products

prepared dishes – prepared dishes and snacks

soups, broths – soups, broths, sauces and condiments

distr. to m. countries – distribution to other member countries

distr. to non-m. countries – distribution to non-member countries

distr. to third countries – distribution to third countries

distribution (possible) – distribution on the market (possible)

distribution restricted – distribution restricted to notifying country

information not available – information on distribution not (yet) available

no distr. from n. country – no distribution from notifying country  
no longer on market – product (presumably) no longer on the market

not placed on market – product not (yet) placed on the market

product - customs control – product under customs control

product - customs seals – product allowed to travel to destination under customs seals

product consumed – product already consumed

product past best date – product past best before date

**FIGURE S71** Similarities between product category and distribution status within notifications on foreign bodies.

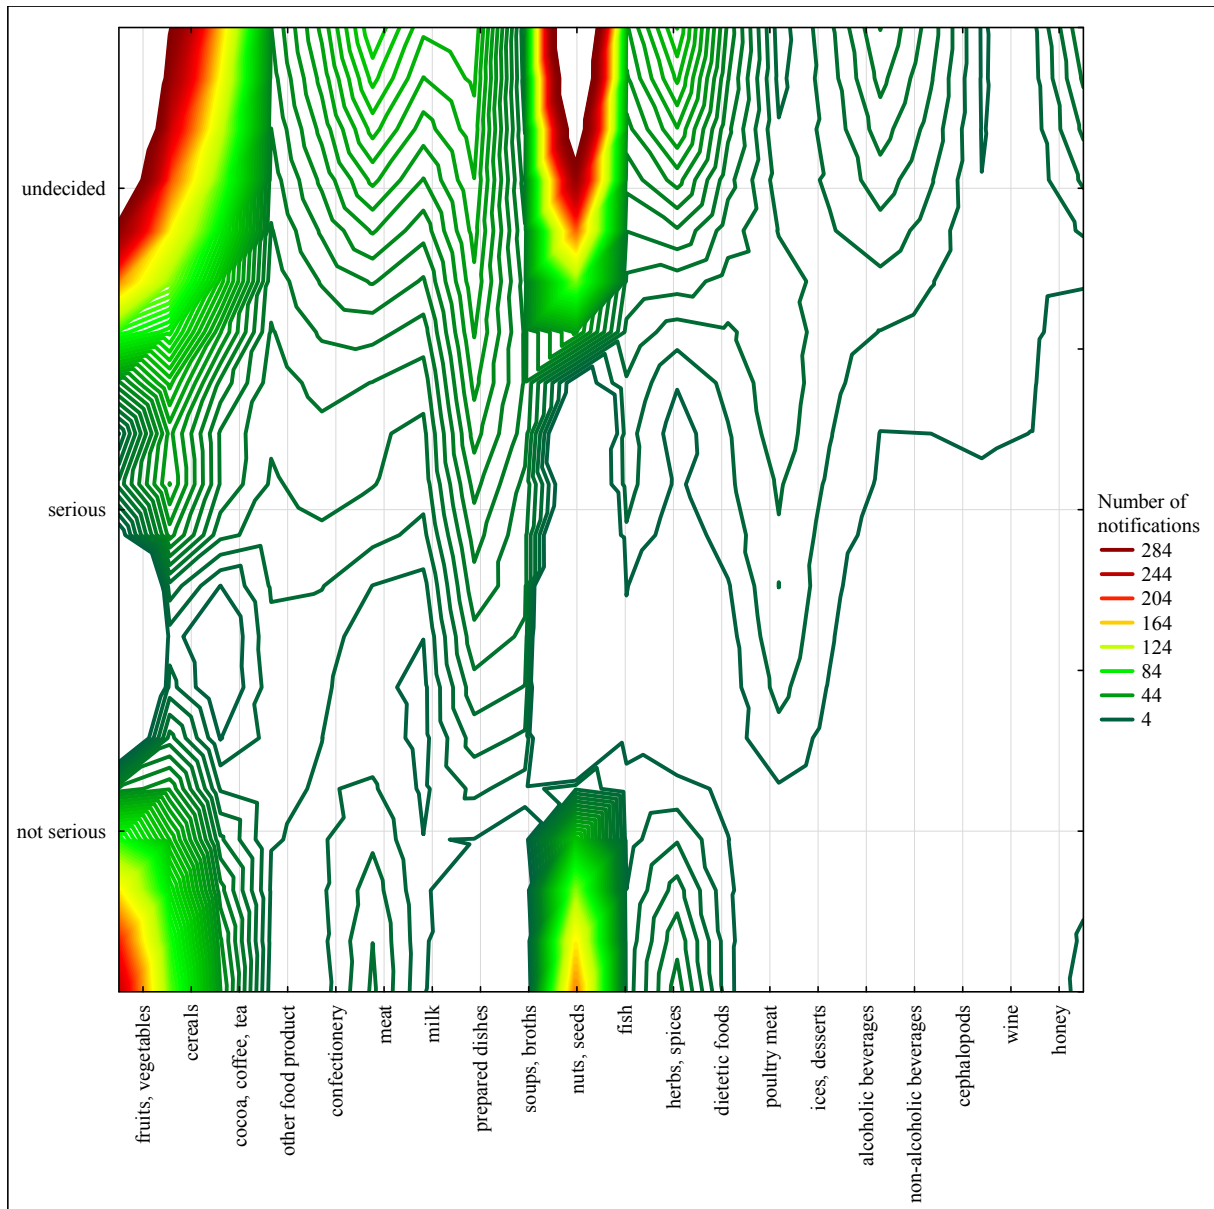

cephalopods – cephalopods and products thereof  
 cereals – cereals and bakery products  
 cocoa, coffee, tea – cocoa and cocoa preparations, coffee and tea  
 dietetic foods – dietetic foods, food supplements, fortified foods  
 fish – fish and fish products  
 fruits, vegetables – fruits and vegetables  
 herbs, spices – herbs and spices  
 honey – honey and royal jelly  
 ices, desserts – ices and desserts  
 meat – meat and meat products (other than poultry)  
 milk – milk and milk products  
 nuts, seeds – nuts, nut products and seeds  
 other food product – other food product / mixed  
 poultry meat – poultry meat and poultry meat products  
 prepared dishes – prepared dishes and snacks  
 soups, broths – soups, broths, sauces and condiments

**FIGURE S72** Similarities between product category and risk decision within notifications on foreign bodies.



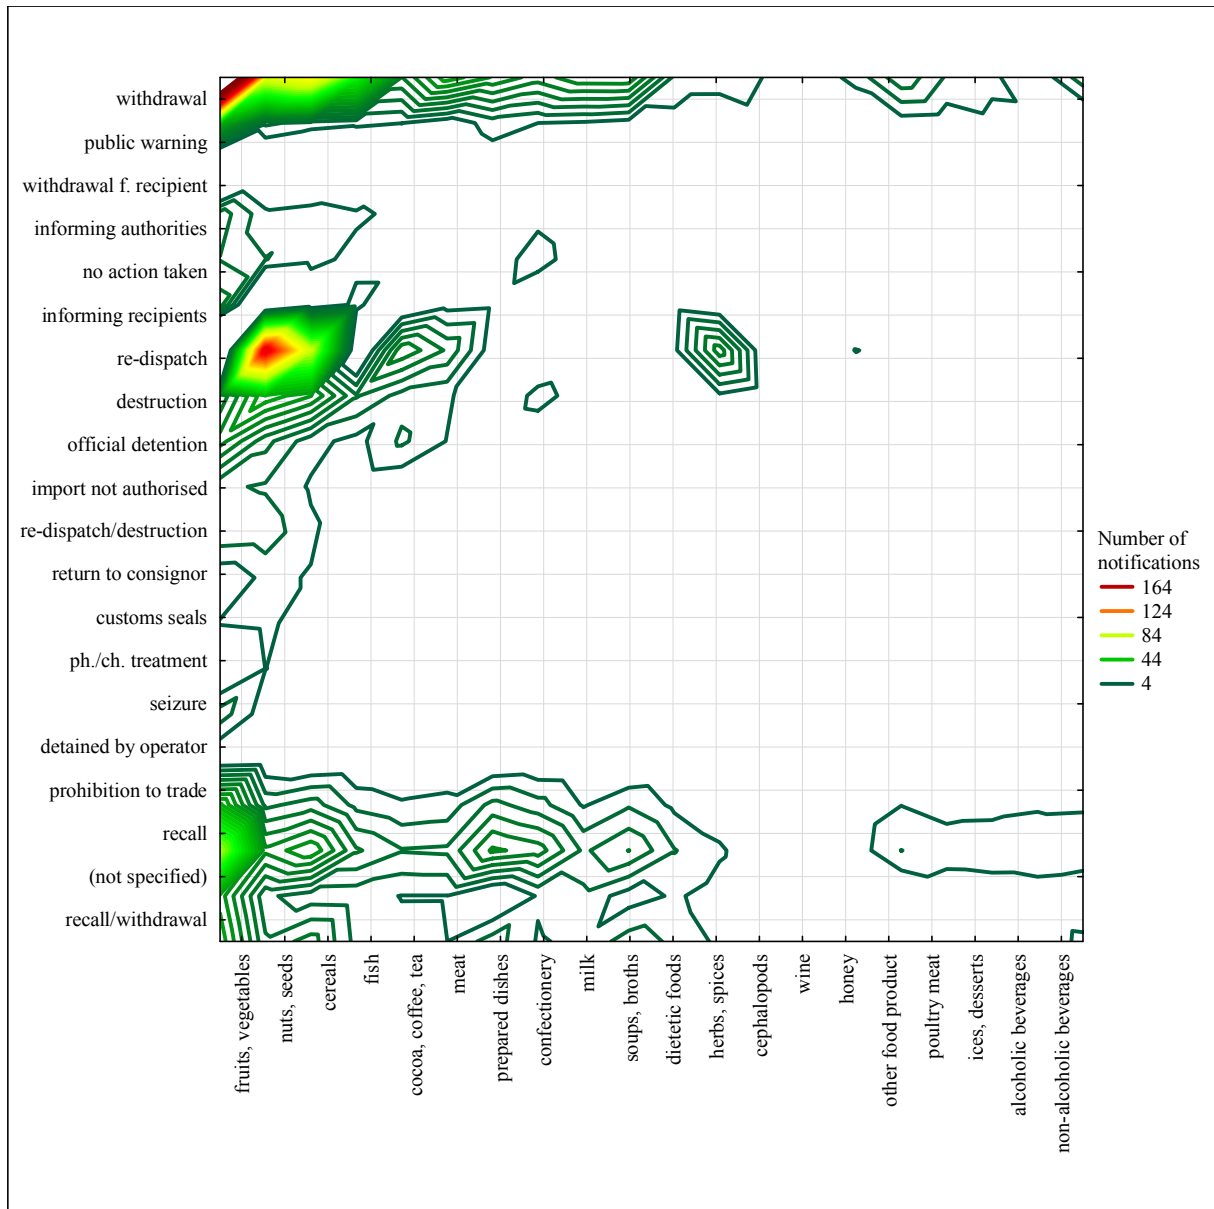

cephalopods – cephalopods and products thereof  
 cereals – cereals and bakery products  
 cocoa, coffee, tea – cocoa and cocoa preparations, coffee and tea  
 dietetic foods – dietetic foods, food supplements, fortified foods  
 fish – fish and fish products  
 fruits, vegetables – fruits and vegetables  
 herbs, spices – herbs and spices  
 honey – honey and royal jelly  
 ices, desserts – ices and desserts  
 meat – meat and meat products (other than poultry)  
 milk – milk and milk products  
 nuts, seeds – nuts, nut products and seeds  
 other food product – other food product / mixed  
 poultry meat – poultry meat and poultry meat products  
 prepared dishes – prepared dishes and snacks  
 soups, broths – soups, broths, sauces and condiments

customs seals – placed under customs seals  
 ph./ch. treatment – physical/chemical treatment  
 prohibition to trade – prohibition to trade - sales ban  
 public warning – public warning - press release  
 recall – recall from consumers  
 recall/withdrawal – product recall or withdrawal  
 re-dispatch/destruction – re-dispatch or destruction  
 withdrawal – withdrawal from the market  
 withdrawal f. recipient – withdrawal from recipient(s)

**FIGURE S73** Similarities between product category and action taken within notifications on foreign bodies.
